# Supplementary material
Source: publisher figshare collection journal article supplement (https://tandf.figshare.com/articles/dataset/_/1378789)
Supplement: Supplementary file 1 [file 3]

Archive with 2 entries (2 files):
- Supplementary Tables.xlsx
- Supplementary Figures.pdf
