# Supplementary material
Source: publisher figshare collection journal article supplement (https://tandf.figshare.com/articles/dataset/_/1378789)
Supplement: Supplementary file 1 [file 3 › Supplementary Tables.xlsx]

## Sheet: SuppTable1
Supplementary Table 1 |Summary of TCGA cohorts and sample sizes.
Cohort	Cancer Type	Tumors with RNA-Seq	Matched Normals with RNA-Seq	Tumors with Copy Number Calls	Tumors with Mutation Calls	Read Length
BLCA	Bladder Urothelial Carcinoma	154	19	134	98	2x50 bp
BRCA	Breast Invasive Carcinoma	719	104	707	686	2x50 bp
CRC	Colon Adenocarcinoma (COAD) and Rectum Adenocarcinoma (READ)	521	21	521	200	1x76 bp
HNSC	Head and Neck Squamous Cell Carcinoma	304	37	304	300	2x50 bp
KIRC	Kidney Renal Cell Carcinoma	481	69	477	331	2x50 bp
LUAD	Lung Adenocarcinoma	299	55	299	149	2x50 bp
LUSC	Lung Squamous Cell Carcinoma	234	34	234	177	2x50 bp
UCEC	Uterine Corpus Endometrial Carcinoma	166	10	164	141	1x76 bp
Total		2878	349	2840	2082

## Sheet: SuppTable2
Supplementary Table 2 | LncRNAs altered across eight cancer types. The number of significantly up-regulated, down-regulated, and outlier lncRNAs are reported. LncRNAs are sorted by the number of cohorts in which they are altered. For significantly differentially expressed (DE) lncRNAs, the false discovery rate (FDR) and log2 fold change (log FC) from edgeR are reported. For significant outliers, …
						BLCA					BRCA					CRC					HNSC					KIRC					LUAD					LUSC					UCEC
TranscriptID	GeneSymbol	TotalAltered	TotalUpDE	TotalDownDE	Outliers	DE FDR	log FC	Outlier FDR	AvgTumorFPKM	AvgNormalFPKM	DE FDR	log FC	Outlier FDR	AvgTumorFPKM	AvgNormalFPKM	DE FDR	log FC	Outlier FDR	AvgTumorFPKM	AvgNormalFPKM	DE FDR	log FC	Outlier FDR	AvgTumorFPKM	AvgNormalFPKM	DE FDR	log FC	Outlier FDR	AvgTumorFPKM	AvgNormalFPKM	DE FDR	log FC	Outlier FDR	AvgTumorFPKM	AvgNormalFPKM	DE FDR	log FC	Outlier FDR	AvgTumorFPKM	AvgNormalFPKM	DE FDR	log FC	Outlier FDR	AvgTumorFPKM	AvgNormalFPKM
uc011ara.2		5	5	0	0	3.27866e-09	3.479		0.616	3.802	7.89046e-53	2.495		0.316	2.343																6.32382e-41	3.327		0.151	1.777	8.1442e-55	4.354		0.189	2.655	1.8012e-11	5.117		0.131	4.942
ENST00000553153	DUXAP10	5	5	0	0	3.77115e-13	3.785		0.795	6.254						9.70788e-07	2.121		0.194	2.351	4.37962e-19	3.865		0.328	4.344	4.64418e-32	2.625		0.446	3.009						8.31365e-25	3.18		0.554	6.293
NR_033849	FAM83H-AS1	5	4	0	1						4.21092e-40	2.194		4.522	20.507	5.3546e-35	3.076		1.098	9.55			0.00509	12.941	7.579						1.20478e-48	2.047		2.106	9.993	1.66392e-61	2.978		1.859	16.031
ENST00000594027		5	2	0	3	2.86593e-10	6.03		0.797	10.628			0	0.408	0.169													0.00587	1.239	0.031			0.01313	0.686	0.018	1.17199e-26	7.964		0.127	7.69
NR_109779	LINC01279	5	0	5	0	5.47466e-15	-3.455		15.72	1.649	1.63988e-93	-8.472		9.283	0.211	1.50951e-16	-2.568		4.989	1.045						2.14012e-16	-8.163		2.005	1.173											3.49391e-10	-5.239		9.347	0.015
TCONS_00019822		5	0	2	3			0.00772	2.336	2.423			0	0.584	0.034								0.01587	1.124	0.418						2.26327e-10	-2.409		9.385	13.233	2.0944e-12	-3.674		8.029	18.545
ENST00000504082		5	0	1	5			0.02316	16.089	13.733								0	56.712	14.618			0	15.045	17.519	1.19215e-10	-8.899	0	14.14	12.498								0.00591	22.564	13.726
TCONS_l2_00017848	BMS1P17/BMS1P18	4	4	0	0	4.60416e-12	3.707		0.924	7.171						4.87459e-08	2.376		0.281	2.892	4.93365e-19	3.666		0.573	6.512											1.26364e-28	3.149		0.807	9.149
uc001vvk.1	DUXAP10	4	4	0	0	2.08386e-11	3.495		0.697	5.795						9.64992e-07	2.104		0.254	2.411	6.354e-18	3.73		0.365	4.053											1.04815e-25	2.721		0.683	5.677
ENST00000504531	CASC9	4	3	0	2																2.52038e-29	6.497		0.251	4.926			0.00034	0.569	0.244	1.28446e-05	3.72		0.044	1.96	3.02548e-73	8.456	0.0264	0.032	6.726
ENST00000415479		4	3	0	1								0	0.172	0.025						4.30655e-28	6.409		0.022	1.629						1.52573e-27	3.36		0.163	2.2	1.8552e-22	3.607		0.324	2.715
ENST00000457958	LINC00511	4	3	0	1						5.5924e-28	2.083		0.448	2.94			0.00947	12.608	9.541											1.01042e-41	3.031		1.067	9.035	5.53344e-66	4.488		0.817	17.588
TCONS_00011213		4	2	0	3			0.02632	8.709	3.962								0.00129	4.396	1.668	1.51129e-56	4.069	0.007	3.234	36.359											6.80985e-20	3.034		1.684	18.485
TCONS_00019120	LINC00958	4	2	0	3								0.0374	1.345	1.779						2.92142e-08	2		3.326	11.973			0.01028	4.97	3.853						2.90748e-16	4.96	0.02176	0.126	7.095
NR_110468	HAGLR	4	1	3	0											4.78617e-20	-2.656		7.502	1.915	4.77506e-10	2.037		0.223	1.355											5.63414e-20	-2.443		10.107	3.256	2.52437e-11	-3.969		5.172	1.846
TCONS_00026823	TINCR	4	1	2	2						8.01649e-27	2.258		1.335	8.237	4.11923e-14	-3.128	0.00048	1.671	0.303											8.85412e-31	-3.272		3.643	1.02								0.00454	1.173	0.335
ENST00000609300	LINC00261	4	1	2	2								0	0.147	0.004																1.07346e-11	-2.221		8.621	4.881	1.8044e-31	-6.186	0	6.974	0.974	1.6036e-25	8.818		0.446	23.717
ENST00000583942	LOC100505817	4	1	0	4			0.01379	1.509	0.063								0	1.03	0.03	1.79735e-10	2.902	0.021	0.19	3.202								0.00739	0.37	0.078
TCONS_00008143		4	0	4	0											2.1376e-09	-3.114		45.544	9.626	9.77801e-07	-2.829		11.414	4.115						3.14133e-20	-2.525		15.496	6.046	1.47241e-27	-3.657		14.867	3.643
TCONS_00014342	MAGI2-AS3	4	0	4	0	6.00406e-09	-2.262		2.319	0.638	9.30606e-77	-2.069		5.556	1.316																					9.78927e-37	-2.345		3.827	0.856	5.29339e-09	-4.074		3.182	0.286
ENST00000600553	FENDRR	4	0	4	0	7.46716e-15	-4.616		16.09	0.859						5.8032e-12	-2.401		11.472	1.71											3.1467e-56	-4.405		9.743	0.506	1.18943e-38	-5.821		9.678	0.459
NR_026779	LINC00341	4	0	4	0	1.99871e-06	-2.097		1.685	0.571	5.44969e-56	-2.973		12.494	1.658																8.1195e-44	-2.211		3.455	0.762	6.22033e-25	-2.308		3.303	0.654
TCONS_00024657		4	0	3	1																					3.30907e-39	-9.944		10.469	0.421	3.83439e-16	-2.647		7.071	2.126	2.14145e-06	-2.161		4.069	1.598			0.00106	0.24	15.863
TCONS_00025560	LINC00675	4	0	2	2																1.34405e-08	-3.98		2.154	0.252	1.26256e-69	-8.069		6.115	0.036			0.00328	0.526	0.036			0.00823	0.568	0.031
NR_026860	LINC00473	4	0	2	2	2.1834e-07	-3.883		0.777	0.29			0	0.482	0.192											3.35795e-58	-6.102		5.03	0.267			0	1.837	0.136
TCONS_l2_00001826		4	0	1	4								0.00958	0.128	0.032											1.56388e-46	-6.248	0	19.501	4.929			0.01254	3.306	0.02			0	0.488	0.007
TCONS_l2_00025426		3	3	0	0																5.40921e-22	5.119		0.043	1.845						3.6617e-63	6.307		0.025	5.084	6.73371e-33	7.279		0.023	6.686
TCONS_00019596		3	3	0	0											2.84756e-24	4.687		0.108	3.164	5.88116e-15	2.786		1.438	4.972											5.47906e-75	7.311		0.042	6.653
TCONS_00020864		3	3	0	0	5.33207e-06	4.961		1.004	2.441											4.36067e-14	6.697		0.031	1.117											5.95334e-30	9.425		0.004	2.843
NR_103783	BLACAT1	3	3	0	0											5.08757e-29	5.544		0.041	1.501											3.35635e-31	2.695		0.19	1.341	5.50412e-11	2.193		0.171	1.025
uc003njq.2	FKSG63	3	3	0	0																1.72293e-31	3.189		0.337	2.768	1.07805e-29	2.035		0.655	3.399						4.62253e-21	2.459		0.405	2.109
ENST00000550223	LINC01234	3	3	0	0											7.92893e-16	8.926		0.002	1.397	1.67897e-28	7.982		0.01	0.953											2.32136e-38	7.196		0.007	2.053
ENST00000601079	LOC284801	3	2	1	1											3.43116e-14	2.84	0	0.743	18.587	4.47745e-18	2.807		0.581	5.203	1.03602e-14	-5.492		1.693	1.442
TCONS_00004507	LINC01116	3	2	1	0																6.96564e-07	2.104		0.545	3.101											3.26871e-08	2.335		0.453	3.133	1.15735e-06	-3.654		6.151	2.296
TCONS_00018114	LINC00707	3	2	0	1								0.00421	0.753	0.21						2.16338e-06	2.619		0.479	1.403	5.56963e-18	2.474		0.142	0.981
TCONS_00026750	UCA1	3	2	0	1											1.15221e-12	3.537		0.699	15.937													0.01254	3.07	0.052	1.4829e-15	3.763		0.067	2.107
TCONS_00029745		3	2	0	1																1.50603e-24	2.982		1.074	8.433			0.00034	0.554	0.166	1.09132e-21	2.09		0.785	6.269
ENST00000440326		3	2	0	1																8.30113e-16	2.737		0.344	2.956			0	0.193	0.088						3.60198e-24	3.402		0.148	1.791
ENST00000455984		3	2	0	1																4.23702e-12	4.49		0.282	4.56								0.01818	1.695	0.016	8.46398e-52	8.518		0.022	9.887
uc003ysa.2	CCAT1	3	2	0	1											4.31414e-26	4.516		0.232	4.311													0.00739	0.616	0.008	5.85525e-20	6.491		0.013	4.123
ENST00000509399		3	2	0	1													0	2.655	0.026	1.44551e-13	4.901		0.169	6.285											6.89608e-11	4.73		0.014	2.785
TCONS_00009975	PART1	3	1	2	1																7.75623e-14	-3.422		12.948	3.234	1.37737e-43	-7.545	0	2.453	1.447						1.00259e-12	4.483		0.137	6.732
TCONS_l2_00004762		3	1	2	0	4.91886e-06	-2.706		7.084	2.648						4.26273e-10	-2.053		4.864	1.429						1.57849e-34	2.332		1.924	12.191
TCONS_00000759		3	1	1	2													0	7.383	5.791						5.28727e-13	-6.227	0	3.083	1.835						3.87468e-24	2.281		2.386	17.799
TCONS_00000698		3	1	1	1																8.09128e-31	2.814		0.901	5.169	1.33766e-09	-5.842		1.121	0.939													0	0.594	7.1
ENST00000400831	LOC441178	3	1	1	1								0	0.61	0.084	6.36819e-11	2.306		0.206	0.746	5.06258e-27	-5.891		8.602	0.297
ENST00000433510		3	1	1	1													0.00048	14.533	13.66	2.6227e-22	6.219		0.043	1.967	1.2562e-18	-6.665		1.299	0.877
TCONS_00011854		3	1	0	3			0.00772	3.775	0.061						1.21974e-10	4.017	0.00477	2.021	34.94																		0	3.974	1.105
NR_004855	HULC	3	1	0	3											4.18272e-09	7.049	0	0.029	17.065								0	0.158	0.027								0	0.671	0.094
ENST00000505089		3	1	0	3								0	17.004	10.969											1.33704e-20	3.969	0	0.134	5.274													0	7.993	2.95
TCONS_00029630		3	1	0	2								0	0.294	0.176						9.26001e-08	2.991		1.077	9.051													0.0384	5.042	0.244
ENST00000519144	LINC00968	3	0	3	1						2.38095e-50	-3.977	0.00053	3.314	0.214																2.17095e-64	-3.783		3.266	0.286	4.35629e-51	-4.758		3.724	0.192
TCONS_00005695		3	0	3	0																					9.51688e-59	-4.461		2.575	0.197	2.77753e-09	-2.068		3.031	1.759	2.67679e-34	-4.508		2.771	0.266
TCONS_00007953		3	0	3	0	4.3687e-06	-2.148		0.98	0.374																					4.34141e-32	-2.274		2.943	0.587	1.13592e-45	-3.352		3.615	0.351
TCONS_00008319		3	0	3	0											2.63567e-05	-2.628		1.561	1.014						2.93374e-67	-10.088		1.501	0.092						1.45413e-15	-4.895		0.901	0.149
TCONS_l2_00022885	LOC100506674	3	0	3	0	2.43204e-07	-2.566		0.753	0.19						8.53158e-15	-2.877		0.81	0.088						6.87934e-17	-7.494		1.049	0.321
TCONS_00010138	MIR143HG	3	0	3	0	1.22421e-15	-4.021		3.346	0.168	2.43683e-144	-3.428		4.988	0.503	3.87082e-23	-3.337		1.99	0.161
TCONS_l2_00029054		3	0	3	0																5.44146e-14	-2.35		3.097	0.847	2.86992e-16	-7.8		4.274	1.546						1.61923e-22	-2.443		6.979	1.834
TCONS_00020243		3	0	3	0																					1.06503e-12	-6.074		2.061	1.111	2.28727e-32	-3.614		5.783	1.582	1.12572e-43	-5.181		4.854	0.347
TCONS_00021896	LINC00551	3	0	3	0																					1.50423e-45	-8.204		1.547	0.066	1.16506e-13	-2.978		1.531	0.17	1.02459e-16	-3.786		0.774	0.099
TCONS_00022428		3	0	3	0																					4.91178e-48	-8.395		0.815	0.138	1.01864e-08	-2.391		2.446	2.631	1.6892e-47	-6.374		2.002	0.155
TCONS_00023441	LOC102723344	3	0	3	0											2.44568e-13	-3.402		1.809	0.303	6.82123e-11	-3.356		0.742	0.088	2.77607e-33	-7.048		1.438	0.085
TCONS_l2_00009224	LOC100996492	3	0	3	0																					8.01348e-33	-9.073		1.468	0.223	1.93551e-51	-4.569		1.382	0.15	3.82868e-60	-5.766		1.099	0.052
TCONS_00025721		3	0	3	0																					7.07502e-22	-6.534		4.056	1.082	5.50805e-48	-2.718		4.197	0.743	2.05635e-21	-3.247		4.069	0.953
TCONS_00026862		3	0	3	0																					1.89113e-15	-7.818		1.512	0.597	1.28541e-39	-2.611		1.693	0.425	3.24332e-32	-3.306		1.303	0.182
TCONS_l2_00012922		3	0	3	0																					2.01727e-62	-7.994		0.961	0.041	9.65745e-13	-2.129		2.309	1.251	2.3751e-37	-4.066		1.451	0.295
ENST00000597702	PCAT19	3	0	3	0	3.72273e-06	-2.002		1.881	0.723																					3.33046e-60	-2.775		7.499	1.178	1.28155e-69	-3.855		7.906	0.775
ENST00000457989		3	0	3	0																					1.14122e-13	-6.299		2.679	3.112	1.01968e-27	-3.924		3.978	0.938	3.84995e-26	-6.191		3.424	0.366
uc002rnf.1		3	0	3	0																					1.10457e-15	-2.111		1.787	0.612	5.91621e-33	-2.339		4.963	0.877	2.51314e-39	-4.296		5.449	0.448
NR_033957	LINC00842	3	0	3	0						5.81494e-50	-3.765		1.047	0.22	9.22577e-27	-4.821		0.763	0.062											3.33918e-38	-3.807		1.347	0.225
NR_024283	LINC00961	3	0	3	0						2.77786e-39	-2.332		2.558	0.825																2.1168e-59	-2.675		2.545	0.379	1.08821e-61	-3.617		2.455	0.249
uc010irg.3	HAND2-AS1	3	0	3	0	1.35667e-09	-4.574		4.01	0.205						3.55455e-24	-5.78		6.784	0.131																					6.19603e-07	-4.61		4.379	0.684
ENST00000453666		3	0	3	0																					9.9868e-25	-2.799		11.482	3.344	3.27389e-23	-3.953		14.443	3.212	7.5145e-60	-7.1		13.003	0.349
ENST00000580756		3	0	3	0	9.58929e-06	-2.423		2.296	0.601																					5.08516e-25	-2.03		5.395	1.519	6.86557e-23	-2.892		5.744	0.718
ENST00000551450		3	0	3	0																					6.98326e-16	-5.781		1.746	0.507	1.52359e-39	-2.711		3.339	0.591	1.03742e-43	-3.935		3.296	0.356
TCONS_00009908		3	0	2	2						7.60146e-12	-7.565		2.702	0.207			0	8.27	5.343						1.08956e-13	-10.811	0	9.233	4.125
TCONS_00015968		3	0	2	2													0	0.454	0.422						8.97755e-10	-4.972	0.00034	2.491	4.102						1.38758e-32	-4.293		2.672	0.211
TCONS_00016890		3	0	2	2													0	5.336	7.599						2.38213e-24	-7.783	0	5.732	1.302						4.96337e-11	-2.214		4.996	1.875
ENST00000439707	LINC00284	3	0	2	2								0	0.275	0.506						2.56671e-12	-5.785		1.345	0.088	1.47023e-43	-5.353	0.00921	3.506	0.463
NR_024371	LINC00982	3	0	2	2																					2.42913e-82	-8.141	0.00587	26.595	0.697						1.91013e-32	-4.132		1.492	0.259			0	2.285	1.147
TCONS_00017929	SFTA1P	3	0	2	1																		0.035	1.191	0.096						1.82194e-26	-2.922		73.217	22.493	1.43476e-71	-6.163		70.469	2.878
ENST00000556266	DIO3OS	3	0	2	1	3.66637e-10	-3.448		6.122	1.287			0	0.785	3.165																					1.00749e-20	-2.921		2.562	0.534
ENST00000555928	MEG3	3	0	2	1	1.98525e-07	-2.181		16.254	6.223	2.10543e-56	-2.55		10.176	2.203													0.02086	1.627	0.982
TCONS_00018519		3	0	1	3													0.00504	2.351	0.151						3.56947e-30	-9.471	0.0342	16.265	1.903													0	0.716	11.539
uc002hng.1		3	0	1	3								0.00202	0.156	0.003											8.79923e-56	-7.944	0.03683	6.812	0.489													0.01623	0.855	0.448
ENST00000563192		3	0	1	3													0	22.652	17.069						3.0031e-15	-8.006	0	14.247	6.495													0	5.817	35.57
TCONS_00008501		3	0	1	2			0.00965	0.232	0.006																1.46124e-48	-10.571		1.844	0.033								0	0.37	0.001
TCONS_l2_00021326		3	0	1	2																		0.01587	0.514	0.126	2.8381e-50	-5.614		4.752	0.342			0.02758	0.791	0.416
TCONS_00015431		3	0	1	2								0	0.042	0.003											1.48741e-59	-10.814		2.633	0.033								0	2.067	0
TCONS_00005366		3	0	0	3			0.01447	2.916	0.739								0.00048	6.985	0.149			0	2.15	0.12
ENST00000457364		3	0	0	3			0	16.386	10.605													0	8.739	8.428													0.0032	17.347	11.539
TCONS_00017740		2	2	0	1																					1.39406e-70	4.469	0	1.788	30.424						3.62422e-24	5.868		0.067	5.801
TCONS_l2_00017159		2	2	0	1																6.48636e-31	3.709	0.032	0.461	4.37											1.32388e-15	2.7		0.219	2.04
TCONS_00001511		2	2	0	0											5.34442e-19	4.306		0.04	0.858																5.4682e-36	6.165		0.027	0.929
TCONS_l2_00001306		2	2	0	0																2.86136e-15	2.316		0.36	1.406											4.66341e-22	4.39		0.077	1.748
TCONS_00000371	PCAN-R1	2	2	0	0																										2.78252e-35	2.243		0.671	3.924	2.19086e-30	2.964		0.65	5.391
TCONS_00007922		2	2	0	0																6.15628e-45	3.167		0.649	4.306											4.52543e-14	2.242		0.506	2.149
TCONS_00012377		2	2	0	0																7.94307e-12	4.444		0.128	1.181											1.51447e-07	5.246		0.012	1.526
TCONS_00014973		2	2	0	0											7.26167e-09	2.48		0.127	0.831																4.92401e-18	3.906		0.084	2.404
TCONS_00015365	PVT1	2	2	0	0											7.40586e-19	2.641		1.146	8.337						1.08127e-83	5.123		0.318	10.206
TCONS_00024510		2	2	0	0																9.55168e-26	4.438		0.039	1.309											1.48266e-14	3.042		0.105	0.628
ENST00000443947		2	2	0	0																1.83454e-38	4.375		0.226	2.892											1.79212e-20	3.625		0.134	2.006
uc021wad.1		2	2	0	0																1.0282e-23	5.457		0.032	0.717											4.52868e-27	7.949		0.002	0.485
uc011bta.1		2	2	0	0	2.73827e-06	2.28		0.32	1.539																										2.45199e-16	2.313		0.191	1.197
ENST00000559321		2	2	0	0											5.01146e-25	6.963		0.015	2.611																7.5528e-15	6.805		0.017	1.902
ENST00000512035		2	2	0	0																9.37133e-09	2.81		0.194	1.314											8.82694e-12	2.702		0.213	1.729
NR_026878	FOXD2-AS1	2	2	0	0	4.24391e-08	2.262		0.405	1.389											2.08689e-18	2.281		0.157	0.891
ENST00000444865	LINC00460	2	2	0	0											3.17117e-24	7.494		0.011	1.908	1.90173e-24	5.597		0.041	1.192
NR_103756	LINC00491	2	2	0	0																2.68994e-17	3.214		0.282	1.536											6.25848e-51	6.387		0.014	1.295
ENST00000557518	LINC00519	2	2	0	0																1.95201e-09	2.256		0.557	3.655											5.60867e-29	5.417		0.074	5.402
NR_103549	LUCAT1	2	2	0	0																					3.0732e-45	5.592		0.083	2.5	3.49601e-17	3.003		0.299	2.758
ENST00000537192		2	2	0	0																5.02783e-08	2.081		0.227	1.013											8.86869e-37	6.32		0.067	2.228
ENST00000439804		2	2	0	0																1.32882e-13	7.845		0.011	0.907											1.72126e-63	8.701		0.005	1.771
ENST00000433644		2	2	0	0											7.63037e-10	2.052		0.357	1.244																8.42982e-21	2.331		0.164	0.866
ENST00000561705		2	2	0	0																										1.7379e-07	2.022		0.587	2.893	1.29883e-18	3.836		0.44	5.962
ENST00000546784		2	2	0	0																1.09422e-34	4.349		0.586	7.033											7.32689e-12	2.481		0.361	2.846
ENST00000478294		2	2	0	0																2.75796e-15	3.055		0.219	2.084											4.48216e-25	6.309		0.009	0.976
ENST00000554032		2	2	0	0																										1.96683e-33	2.574		0.557	4.629	1.64897e-18	2.358		0.466	2.937
TCONS_l2_00014536	LOC102723854	2	1	1	1						3.68705e-24	-3.474	0.0187	3.52	1.52	1.99901e-05	4.133		0.072	3.223
uc021qoj.1		2	1	1	1																1.30932e-36	3.025	0.01185	1.215	8.204	5.49469e-13	-6.237		1.726	0.987
ENST00000552324		2	1	1	1																1.58931e-21	2.364		1.41	6.495	2.6816e-12	-6.39	0	2.641	1.906
ENST00000419745		2	1	1	1																1.02883e-37	2.93	0	0.878	5.805	1.95463e-11	-6.791		1.065	0.834
TCONS_00016354		2	1	1	0																4.52607e-17	-5.615		4.188	0.333											2.06211e-09	4.615		0.036	0.822
TCONS_00022099		2	1	1	0																					1.35113e-19	-7.712		3.81	0.89						2.09197e-22	2.157		1.161	6.316
TCONS_l2_00017190		2	1	1	0	5.0801e-06	-3.944		5.278	0.482																										8.0156e-09	2.658		0.258	4.144
uc002jit.1	LINC01152	2	1	1	0						5.31572e-32	-2.731		3.411	0.643											9.5215e-37	3.353		0.076	0.686
NR_026690	LINC00035	2	1	1	0																					6.3667e-24	2.506		0.444	2.416						4.06404e-20	-2.581		3.183	1.336
TCONS_00005419	LINC00506	2	1	0	2																					4.47124e-15	5.29	0	0.04	6.756													0.00195	6.88	2.774
ENST00000413290		2	1	0	2											1.80175e-20	6.323	0.02182	0.014	3.595																		0	0.914	0.005
TCONS_00000008	LINC00626	2	1	0	1																							0.00034	1.344	0.092						1.82303e-24	8.135		0.005	1.314
TCONS_l2_00018982		2	1	0	1																3.39772e-18	8.518		0.124	5.657													0.04345	0.625	0.023
TCONS_00012368	LINC01018	2	1	0	1																4.43284e-25	4.052		0.408	5.411			0.00378	0.493	0.07
TCONS_00017736		2	1	0	1								0	0.334	0.061						1.77623e-10	4.652		0.134	1.317
TCONS_00019179		2	1	0	1											1.59662e-05	2.873		0.382	4.71								0.04443	5.692	0.681
TCONS_l2_00005286	LOC650368	2	1	0	1								0	4.514	4.315						2.85383e-25	2.318		0.544	2.324
TCONS_l2_00009437		2	1	0	1																		0.00156	3.345	1.387											7.08263e-36	3.079		0.639	4.601
TCONS_00024663	CRNDE	2	1	0	1								0	44.592	33.464	1.57536e-17	4.287		0.198	5.362
TCONS_00029315	LINC00162	2	1	0	1																2.88544e-06	3.273		0.24	4.977			0.00034	0.179	0.014
ENST00000538734	LINC00925	2	1	0	1																															1.58957e-11	2.638		0.156	1.647			0.02139	0.741	0.425
ENST00000589662		2	1	0	1													0	1.112	0.095																4.99285e-39	4.559		0.076	1.816
ENST00000423943	LINC01133	2	1	0	1								0.03935	0.706	1.115																					5.7313e-11	3.503		0.716	12.239
ENST00000448374	APCDD1L-AS1	2	0	2	2						2.46064e-44	-3.447	0	3.853	0.775											1.49223e-37	-5.045	0	2.496	0.735
TCONS_00008505		2	0	2	1											6.07532e-15	-3.018		15.527	3.821						3.38143e-29	-6.096	0.00128	3.53	0.38
TCONS_00014250	LOC101927391	2	0	2	1																					1.21189e-14	-6.499	0	1.969	1.239						1.11474e-17	-2.255		1.983	0.567
TCONS_l2_00025701		2	0	2	1																1.09076e-10	-2.268		2.599	0.888	4.89548e-14	-8.293	0	8.641	4.784
TCONS_00013633	WDR86-AS1	2	0	2	1						3.94436e-61	-2.916	0	4.813	0.894																					4.75775e-07	-2.263		4.203	2.405
ENST00000574086		2	0	2	1																1.10262e-15	-3.101		3.364	0.592	9.57471e-16	-7.493	0	6.501	1.972
TCONS_00004835		2	0	2	0																										2.28479e-11	-2.606		2.105	1.466	4.98943e-33	-6.348		1.628	0.099
TCONS_00006644		2	0	2	0																										1.77684e-76	-7.618		4.651	0.102	9.69734e-63	-8.546		3.789	0.042
TCONS_00008694		2	0	2	0																										3.39425e-49	-3.489		6.006	0.523	3.32722e-39	-4.621		5.519	0.303
TCONS_00009526		2	0	2	0																					9.12109e-19	-10.181		5.639	1.693						7.43472e-21	-2.024		3.302	0.939
TCONS_l2_00024193		2	0	2	0																										3.26732e-18	-2.935		0.965	0.389	6.80905e-37	-5.688		0.91	0.083
TCONS_00012018		2	0	2	0																1.67641e-26	-4.703		3.994	0.385	9.52337e-54	-9.097		3.168	0.079
TCONS_l2_00029287		2	0	2	0																					2.32338e-13	-5.724		0.817	0.495						5.75127e-53	-4.059		1.857	0.166
TCONS_l2_00029090	HMCN2	2	0	2	0	4.56896e-07	-3.875		1.876	0.125						3.62288e-08	-2.784		2.012	0.22
TCONS_00016726		2	0	2	0																										1.14051e-60	-3.973		4.979	0.348	3.78168e-50	-5.036		4.113	0.188
TCONS_l2_00003114	ZNF503-AS1	2	0	2	0																3.2537e-08	-2.662		1.691	0.653											1.59087e-12	-2.407		1.609	0.877
TCONS_l2_00004589		2	0	2	0	2.04843e-14	-4.635		3.501	0.213						1.07878e-19	-3.693		1.345	0.11
TCONS_00020237		2	0	2	0																										9.44864e-50	-2.546		2.637	0.697	6.67099e-31	-2.723		2.148	0.351
TCONS_00022469		2	0	2	0																										1.31562e-22	-3.069		7.806	3.04	9.1369e-42	-7.166		6.107	0.258
TCONS_00022803		2	0	2	0																										9.99231e-31	-2.537		1.353	0.655	2.86264e-16	-2.724		1.213	0.336
TCONS_00023353		2	0	2	0																										2.07818e-11	-2.16		2.922	0.855	5.78144e-11	-2.42		2.176	0.512
TCONS_00024586	LOC101927311	2	0	2	0																										5.18165e-28	-2.996		1.641	0.406	1.63149e-34	-3.876		1.622	0.185
TCONS_00025599		2	0	2	0																					9.78729e-131	-11.496		6.795	0.118						6.28306e-13	-2.013		1.76	0.628
TCONS_l2_00011026		2	0	2	0																					2.64184e-50	-8.034		3.246	0.254						1.84814e-12	-2.128		1.2	0.318
TCONS_00027125	ZNF582-AS1	2	0	2	0																					1.47114e-36	-2.209		3.09	1.096						3.60387e-16	-2.165		1.353	0.441
TCONS_l2_00017555	TPTEP1	2	0	2	0																					3.85901e-40	-2.017		6.081	2.614						8.98061e-09	-2.043		3.25	5.789
ENST00000425887		2	0	2	0																										7.1794e-24	-5.02		17.215	3.828	2.05365e-72	-9.259		15.217	0.121
ENST00000423808		2	0	2	0						4.54505e-59	-5.739		4.322	0.136						2.78359e-10	-3.605		1.969	0.317
ENST00000416553		2	0	2	0																										3.54487e-46	-5.781		2.323	0.091	1.1251e-43	-7.599		2.297	0.027
uc002tjx.4		2	0	2	0	2.0501e-20	-6.277		17.786	0.358						1.47557e-23	-4.828		2.813	0.102
uc003gho.3		2	0	2	0																										1.44558e-13	-2.047		2.213	0.752	2.54957e-17	-2.597		1.19	0.311
NR_024129	LINC00092	2	0	2	0																										9.19897e-27	-2.317		0.935	0.247	6.42244e-20	-2.877		0.834	0.321
NR_024065	LINC00312	2	0	2	0	3.13533e-08	-2.063		2.286	0.694																															3.35602e-06	-3.678		1.731	0.169
NR_103859	LINC01082	2	0	2	0	1.29354e-25	-5.707		20.1	1.13						3.89064e-14	-2.987		12.374	1.41
NR_110514	LOC101927279	2	0	2	0																										6.43786e-49	-2.553		6.189	1.272	2.42557e-18	-2.422		4.122	1.067
NR_109861	LOC101929371	2	0	2	0																										1.52244e-33	-4.071		6.577	0.827	3.95923e-50	-5.699		5.433	0.41
NR_027086	LOC284578	2	0	2	0						1.35925e-52	-2.676		0.983	0.345											5.23883e-109	-7.5		22.742	0.237
ENST00000573270		2	0	2	0																										2.07972e-55	-6.404		2.294	0.082	8.70752e-66	-7.835		1.676	0.067
ENST00000508512		2	0	2	0																										1.984e-28	-3.875		3.972	0.781	4.9649e-43	-7.88		4.528	0.212
ENST00000577123		2	0	2	0																										2.23024e-26	-2.15		1.616	0.452	3.85856e-27	-3.045		1.551	0.311
ENST00000477643		2	0	2	0											6.47759e-08	-2.306		9.836	3.963						1.57847e-10	-3.496		4.318	0.505
ENST00000531511		2	0	2	0																					4.90891e-12	-6.076		1.946	1.41						3.54657e-26	-2.93		2.457	0.29
TCONS_l2_00013871		2	0	1	2																					4.55707e-14	-11.351	0	34.581	11.661			0.00328	0.124	0.005
TCONS_00009859		2	0	1	2								0.00246	0.429	0.478											1.26941e-27	-4.249	0.00128	1.676	0.372
TCONS_l2_00029476		2	0	1	2													0	18.777	13.164						1.26205e-13	-7.459	0	8.941	5.292
TCONS_00018618		2	0	1	2								0	0.037	0.001											1.04551e-85	-12.159	0	2.501	0.656
TCONS_00019861		2	0	1	2													0	9.234	3.366						2.87433e-09	-6.526	0	2.337	3.125
TCONS_l2_00007364		2	0	1	2																					6.73318e-13	-8.212	0	2.444	7.278													0	1.127	3.416
TCONS_00023109		2	0	1	2													0	42.337	38.444						5.40386e-12	-9.699	0	25.169	16.57
TCONS_00029068		2	0	1	2													0	2034.09	618.544						1.9619e-12	-14.067	0	838.878	954.511
NR_047498	LINC00853	2	0	1	2													0	0.581	0.314						8.4821e-13	-5.428	0	1.674	0.735
ENST00000567961	LMF1	2	0	1	2						1.51891e-41	-2.734	0	5.056	2.42													0.00034	1.202	0.403
ENST00000562549		2	0	1	2													0	10.621	9.655						7.4486e-13	-9.562	0	11.111	6.646
NR_045196	SNHG18	2	0	1	2													0	12.146	12.369						1.87052e-10	-8.466	0	4.323	4.454
TCONS_00002280	LINC00982	2	0	1	1																					7.90193e-77	-9.342		16.859	0.367													0.01191	2.806	0.389
TCONS_l2_00014333		2	0	1	1													0	7.684	5.068						6.29623e-13	-8.151		5.128	3.012
TCONS_00009133		2	0	1	1																					9.46826e-15	-5.827		1.364	0.288			0	0.129	0.007
TCONS_00010961		2	0	1	1																1.48226e-27	-4.811		3.345	0.362			0.00206	0.409	0.304
TCONS_00015190		2	0	1	1													0	5.018	2.54						1.63929e-17	-6.275		2.738	0.973
TCONS_00023972	LOC145837	2	0	1	1											5.39205e-07	-2.717		2.392	1.155																		0.0032	1.425	0.254
TCONS_00024399	LOC101927364	2	0	1	1			0.00772	0.461	0.015																9.26693e-67	-10.681		2.95	0.009
TCONS_00025378		2	0	1	1													0.02385	2.175	1.466						1.49454e-10	-6.14		1.571	1.357
TCONS_00026970		2	0	1	1																					1.20472e-58	-11.754		16.061	0.015			0.00876	0.175	0.014
TCONS_00028348		2	0	1	1																					2.58364e-66	-10.493		2.561	0.01			0	0.1	0.002
TCONS_00028028		2	0	1	1													0	6.004	4.787						7.7673e-99	-11.864		17.304	0.719
TCONS_00027985		2	0	1	1													0	6.541	1.918						7.13916e-13	-6.293		2.562	2.026
TCONS_00029256		2	0	1	1																							0	0.226	0.006						2.69875e-24	-4.076		3.158	0.268
uc011abu.2		2	0	1	1								0	0.251	0.943																					6.06159e-12	-2.661		0.737	0.234
ENST00000478824		2	0	1	1													0.00578	13.022	6.055						5.52713e-17	-6.239		0.935	0.606
ENST00000595005		2	0	1	1																												0.03201	0.974	1.717	1.75414e-13	-2.044		1.771	0.47
ENST00000580684	LINC00667	2	0	1	1													0.00636	6.568	10.721																					5.86806e-06	-3.084		8.774	1.799
ENST00000599605	LINC00948	2	0	1	1													0.0243	0.685	0.114						1.57952e-12	-4.34		2.675	0.154
NR_103775	LOC100505984	2	0	1	1																		0	0.446	0.236											4.08036e-27	-4.095		1.957	0.408
NR_024418	LOC389332	2	0	1	1											1.06086e-13	-3.059		4.717	2.11																							0.01191	0.38	0.011
ENST00000530759		2	0	1	1													0	4.223	5.225						9.60258e-19	-7.754		7.297	1.817
ENST00000422780		2	0	1	1																		0.00509	5.074	0.933											3.81829e-11	-2.091		0.717	0.692
TCONS_00006403		2	0	0	2													0.00578	0.577	0.183													0.02111	1.072	0.004
TCONS_l2_00025696	LOC102659288	2	0	0	2																							0.02087	12.431	1.131								0.0384	1.117	0.338
TCONS_00013877		2	0	0	2													0	4.155	0.968																							0	0.314	5.15
TCONS_00014977		2	0	0	2													0.01908	11.431	4.29								0.00182	0.232	0.539
TCONS_00020094		2	0	0	2													0	4.202	8.399								0.00587	4.781	0.108
TCONS_l2_00006118		2	0	0	2								0.00384	0.441	0.676								0.01729	0.884	0.39
ENST00000449713		2	0	0	2													0.00129	0.324	0.076			0.01663	0.362	0.024
ENST00000606706	LINC00458	2	0	0	2													0.00245	0.283	0.002																							0.03492	1.443	0.313
uc001lsz.3	MUC5AC	2	0	0	2																		0	1.365	19.551								0.04056	81.498	5.703
ENST00000507644		2	0	0	2													0.00094	3.689	2.473																		0.00192	0.32	0.012
NR_034011	SNHG8	2	0	0	2								0.04437	77.682	112.595													0.00128	64.223	45.14
ENST00000460130	TCL6	2	0	0	2																							0.01219	1.48	4.434								0	0.382	0.051
TCONS_l2_00009500		1	1	0	1																					2.5085e-26	6.407	0	0.036	12.872
TCONS_l2_00000031		1	1	0	0																										1.21658e-29	2.664		0.391	3.642
TCONS_l2_00000146		1	1	0	0																										9.94042e-31	4.978		0.097	6.573
TCONS_00000870		1	1	0	0																3.76799e-23	2.821		0.289	1.571
TCONS_00001307		1	1	0	0																															1.2769e-22	3.643		0.121	1.238
TCONS_00003611		1	1	0	0																										5.08964e-35	2.826		0.156	1.606
TCONS_l2_00019878		1	1	0	0																					9.3723e-46	2.515		0.235	1.952
TCONS_00006384		1	1	0	0																															1.08208e-08	2.546		0.66	5.598
TCONS_00006773		1	1	0	0																															2.37417e-21	2.397		0.207	1.038
TCONS_l2_00020587		1	1	0	0																					1.06342e-60	3.573		0.314	2.513
TCONS_00008682		1	1	0	0																1.01303e-06	2.612		0.169	0.694
TCONS_00010005		1	1	0	0																										3.26706e-28	7.025		0.043	6.13
TCONS_00009259		1	1	0	0																					2.39895e-19	2.152		0.568	2.441
TCONS_00011510		1	1	0	0																															2.53002e-47	8.482		0.007	1.801
TCONS_00012775		1	1	0	0																															1.15448e-25	4.37		0.356	7.54
TCONS_00011229		1	1	0	0																					5.58872e-25	2.035		0.309	1.758
TCONS_l2_00025276		1	1	0	0																															5.62202e-31	3.152		0.279	1.937
TCONS_00013382		1	1	0	0																6.70471e-42	5.286		0.264	4.993
TCONS_00013025		1	1	0	0																															1.4944e-07	2.837		0.221	1.684
TCONS_00012897		1	1	0	0	1.53799e-07	4.457		0.261	1.446
TCONS_l2_00029447		1	1	0	0																															3.28861e-14	3.74		0.143	2.873
TCONS_l2_00029084		1	1	0	0											1.35006e-08	2.676		0.263	1.764
TCONS_00016903		1	1	0	0																															6.20843e-20	4.177		0.106	4.16
TCONS_00018589		1	1	0	0	4.43998e-07	5.806		0.282	3.222
TCONS_00019632		1	1	0	0																4.2006e-19	3.136		0.722	3.376
TCONS_00019368		1	1	0	0											6.20643e-10	3.615		0.058	0.985
TCONS_00079056_HOTAIR	HOTAIR	1	1	0	0						4.67909e-08	2.154		0.58	3.169
TCONS_00020179		1	1	0	0											4.14337e-74	8.709		0.018	3.459
TCONS_00022004		1	1	0	0																					1.01082e-06	7.59		0.229	3.915
TCONS_00022096		1	1	0	0																					1.27735e-26	2.165		0.247	1.545
TCONS_00023756		1	1	0	0																															7.8958e-21	3.974		0.044	0.81
TCONS_00025523		1	1	0	0											2.87652e-07	2.744		0.269	2.582
TCONS_00025525		1	1	0	0											1.58473e-23	2.792		0.329	2.596
TCONS_00028417		1	1	0	0																															9.23102e-44	8.124		0.011	2.236
TCONS_00028187		1	1	0	0																															8.16952e-39	9.055		0.002	1.063
TCONS_00028427		1	1	0	0																															6.0759e-45	9.029		0.004	0.951
TCONS_00029211		1	1	0	0																															6.54364e-11	2.086		0.767	3.87
TCONS_00028769		1	1	0	0																					2.49921e-26	3.442		0.659	3.882
TCONS_l2_00017583		1	1	0	0																					1.24132e-67	5.33		0.531	12.323
TCONS_00029603		1	1	0	0																															1.28601e-31	2.43		0.33	1.973
ENST00000609382		1	1	0	0																															4.56724e-43	4.614		0.054	1.209
ENST00000428647		1	1	0	0																															6.61525e-35	2.97		0.281	1.972
uc001vmb.1	SOX21-AS1	1	1	0	0																															2.10995e-16	3.572		0.102	2.23
uc003jnb.1		1	1	0	0																					1.0053e-40	2.058		0.689	2.669
uc001mjn.1		1	1	0	0																					2.66624e-30	6.649		0.017	1.393
uc002idi.1	LOC101929767	1	1	0	0																					1.54292e-22	2.012		1.153	9.147
uc021set.1		1	1	0	0																										3.53128e-14	2.213		1.07	4.869
ENST00000453784		1	1	0	0																					6.06483e-37	5.328		0.018	1.066
uc003luf.3		1	1	0	0																															7.63465e-16	5.197		0.038	1.626
uc002wsk.1		1	1	0	0																					2.10051e-50	9.206		0.001	1.001
ENST00000589440		1	1	0	0																															1.14744e-25	5.191		0.062	2.022
ENST00000599803		1	1	0	0																7.05499e-35	3.543		0.269	2.43
ENST00000591384		1	1	0	0																3.6487e-21	5.515		0.044	1.102
NR_033863		1	1	0	0																					8.98317e-33	3.575		0.421	3.686
NR_027123	KTN1-AS1	1	1	0	0																															6.31854e-23	2.537		0.145	0.859
NR_026873	LINC00174	1	1	0	0																5.12811e-20	2.122		0.353	1.617
ENST00000591629	LINC00669	1	1	0	0																															1.9801e-28	5.073		0.023	0.684
NR_038464	LINC00857	1	1	0	0																										4.00973e-31	2.058		0.445	2.116
ENST00000429578	LINC00887	1	1	0	0																					4.78092e-139	6.257		0.285	10.071
NR_033878	LINC00944	1	1	0	0																					1.46316e-44	5.271		0.105	1.824
NR_110278	LOC101927881	1	1	0	0																															4.96042e-33	3.933		0.055	0.931
NR_029405	LOC643406	1	1	0	0																					1.00422e-20	3.891		0.047	1.771
NR_109758	LOC644919	1	1	0	0																															4.34619e-18	3.712		0.145	2.6
ENST00000528245	MIR210HG	1	1	0	0																					4.84477e-42	2.48		1.886	14.382
ENST00000490357		1	1	0	0																					6.75271e-47	9.963		0.013	1.309
ENST00000595135		1	1	0	0																															1.50227e-18	5.139		0.029	1.175
ENST00000514519		1	1	0	0																															1.0059e-32	3.12		0.446	3.254
ENST00000515485		1	1	0	0																										2.78e-07	2.336		0.439	3.325
ENST00000507296		1	1	0	0																1.85075e-33	3.49		0.12	1.1
ENST00000521586	CARLo-2	1	1	0	0											1.48446e-16	6.494		0.049	3.608
ENST00000564830		1	1	0	0						2.12315e-81	3.783		0.28	3.418
ENST00000417112		1	1	0	0																															1.77268e-08	4.193		0.056	0.998
ENST00000417483		1	1	0	0																															3.51083e-09	3.038		0.058	2.312
ENST00000560238		1	1	0	0																1.05951e-28	4.45		0.185	2.753
ENST00000434309		1	1	0	0																					9.63475e-14	2.54		0.361	2.173
ENST00000420819		1	1	0	0																															4.52379e-28	9.619		0.041	6.369
ENST00000422022		1	1	0	0											4.21711e-09	2.937		0.339	2.713
ENST00000453988		1	1	0	0																1.80863e-37	3.653		0.648	5.292
NR_033851	SERPINB9P1	1	1	0	0																					9.57404e-39	2.321		0.525	2.388
uc003poi.2	TSG1	1	1	0	0																					1.76513e-47	4.941		0.011	0.57
TCONS_00001385		1	0	1	1																					1.17924e-10	-5.896	0	0.921	1.396
TCONS_00001044		1	0	1	1																					2.95036e-14	-9.185	0	7.532	3.719
TCONS_00004205		1	0	1	1																					1.34333e-11	-7.134	0	4.56	2.645
TCONS_00003380		1	0	1	1																					9.65268e-13	-11.028	0	12.874	6.919
TCONS_00009070		1	0	1	1																					2.15274e-13	-5.83	0.00663	4.797	1.856
TCONS_00008869		1	0	1	1																					1.54813e-12	-5.692	0.04532	4.027	1.253
TCONS_00008317		1	0	1	1																					4.51015e-09	-5.968	0.03409	2.534	9.28
TCONS_00008647		1	0	1	1																					4.25389e-06	-5.402	0	1.218	4.883
TCONS_00009206		1	0	1	1																					4.55858e-12	-7.684	0	7.529	4.084
TCONS_00010530		1	0	1	1																					2.8977e-07	-6.275	0	1.647	2.445
TCONS_00012038		1	0	1	1																					8.43216e-07	-4.765	0.04443	1.107	1.652
TCONS_l2_00025081		1	0	1	1																					1.19874e-56	-4.178	0.00682	9.456	0.764
TCONS_00011355		1	0	1	1																					2.41308e-06	-4.735	0	0.84	3.337
TCONS_00013804		1	0	1	1																					2.9093e-07	-7.061	0	11.334	18.001
TCONS_l2_00028084		1	0	1	1																					1.78083e-11	-5.446	0	4.399	2.319
TCONS_l2_00027779		1	0	1	1																					2.64184e-50	-8.72	0.00067	2.116	0.245
TCONS_l2_00029057		1	0	1	1																					5.19572e-23	-8.943	0	14.325	2.986
TCONS_00026678		1	0	1	1																					1.36665e-12	-6.587	0	6.699	3.318
TCONS_l2_00013205		1	0	1	1																					2.01692e-10	-10.07	0	4.419	3.937
ENST00000590022		1	0	1	1																					7.56592e-12	-7.335	0	6.556	5.301
ENST00000427398		1	0	1	1																					4.54371e-37	-8.444	0.00206	4.498	0.443
ENST00000520275		1	0	1	1																					2.11038e-80	-10.481	0	6.85	4.755
ENST00000523617		1	0	1	1																					3.21272e-34	-7.484	0.00034	1.84	0.29
ENST00000566475	HCG22	1	0	1	1																1.65949e-18	-6.935	0.02505	8.368	0.362
ENST00000602901	LINC00478	1	0	1	1						2.23395e-47	-2.076	0.02805	7.582	2.105
NR_110643	LINC01230	1	0	1	1																					5.58656e-68	-11.724	0	2.928	0.682
ENST00000587011		1	0	1	1																					1.53314e-08	-5.893	0	2.031	2.181
ENST00000555403		1	0	1	1																					2.15836e-16	-8.812	0	18.397	5.117
ENST00000577279		1	0	1	1																					5.90275e-20	-7.481	0	9.776	2.194
TCONS_00001982		1	0	1	0																					3.6828e-08	-5.344		0.664	0.776
TCONS_00001457		1	0	1	0																					4.5478e-11	-7.383		2.552	2.126
TCONS_00000975		1	0	1	0																					6.70745e-25	-3.5		1.725	0.52
TCONS_00001553		1	0	1	0																					7.32267e-22	-5.09		0.656	0.105
TCONS_00001555		1	0	1	0											1.37805e-12	-3.847		1.026	0.262
TCONS_00001590		1	0	1	0																					2.45922e-15	-5.929		1.03	0.379
TCONS_00000587		1	0	1	0																					8.45212e-22	-6.227		3.153	0.543
TCONS_00001058		1	0	1	0																					2.72504e-17	-7.097		2.247	0.407
TCONS_l2_00001460		1	0	1	0																					3.32822e-74	-8.55		5.352	0.095
TCONS_00001139		1	0	1	0																					2.22485e-55	-7.897		0.995	0.042
TCONS_l2_00002208		1	0	1	0																					5.17848e-14	-6.32		0.83	0.426
TCONS_00000643		1	0	1	0																															1.68991e-52	-5.997		2.245	0.047
TCONS_00000324		1	0	1	0																					2.28596e-14	-9.085		4.845	1.973
TCONS_00000330		1	0	1	0																					5.19777e-67	-8.218		2.612	0.033
TCONS_l2_00001801		1	0	1	0																					1.59079e-13	-2.57		2.504	2.946
TCONS_00001304		1	0	1	0	1.19272e-07	-3.915		0.515	0.044
TCONS_l2_00002788		1	0	1	0																					1.31966e-11	-6.337		1.388	1.584
TCONS_00000416		1	0	1	0																					4.29885e-11	-6.624		0.924	0.661
TCONS_00002272		1	0	1	0																					1.75804e-13	-6.902		2.026	1.106
TCONS_00004690		1	0	1	0											2.5911e-14	-2.069		1.757	0.546
TCONS_l2_00014437		1	0	1	0																					6.20001e-66	-9.357		1.685	0.01
TCONS_00003609		1	0	1	0																					8.58952e-29	-6.954		0.897	0.13
TCONS_00004742		1	0	1	0																5.30974e-09	-2.03		0.812	0.255
TCONS_00005168		1	0	1	0																					9.22429e-13	-5.786		0.876	0.401
TCONS_l2_00013783		1	0	1	0																2.19641e-08	-3.254		5.464	1.032
TCONS_00004353		1	0	1	0																					8.85989e-10	-6.301		0.722	0.512
TCONS_00004474		1	0	1	0																					6.5596e-27	-8.26		14.273	2.447
TCONS_00005259		1	0	1	0																					7.1873e-23	-7.458		1.414	0.235
TCONS_00004015		1	0	1	0																					5.0292e-14	-8.885		4.123	1.728
TCONS_00003525		1	0	1	0																					1.06351e-11	-6.128		1.056	0.766
TCONS_l2_00018503		1	0	1	0																					6.73318e-13	-5.248		1.285	0.309
TCONS_00005763		1	0	1	0																					1.53141e-12	-6.622		2.221	0.965
TCONS_00006500		1	0	1	0																															6.52803e-36	-4.251		1.142	0.104
TCONS_00006505		1	0	1	0																					1.00061e-21	-5.899		0.858	0.21
TCONS_00006510		1	0	1	0																					1.16185e-52	-7.167		4.398	0.323
TCONS_00007239		1	0	1	0																					8.84858e-15	-5.836		1.316	0.667
TCONS_00006201		1	0	1	0																					1.27875e-13	-5.944		1.587	0.66
TCONS_l2_00019587		1	0	1	0																1.07893e-06	-4.907		31.348	1.324
TCONS_l2_00019674		1	0	1	0																3.82298e-17	-3.79		0.91	0.124
TCONS_l2_00019088		1	0	1	0																					1.66589e-15	-7.065		1.009	0.831
TCONS_l2_00021050		1	0	1	0																					1.37074e-15	-6.201		1.614	0.529
TCONS_00008451		1	0	1	0																															1.28985e-36	-6.551		1.45	0.077
TCONS_00007754		1	0	1	0																					1.32533e-57	-9.028		2.336	0.041
TCONS_00008809		1	0	1	0																					1.00243e-24	-8.465		0.786	0.024
TCONS_00008904		1	0	1	0																					1.39272e-14	-9.071		3.041	1.174
TCONS_00008328		1	0	1	0											1.12572e-16	-2.996		1.433	0.149
TCONS_00008951		1	0	1	0																					3.27308e-15	-6.447		1.378	0.528
TCONS_00009322		1	0	1	0																					8.85914e-51	-9.747		1.782	0.03
TCONS_00010663		1	0	1	0																					2.14124e-14	-8.251		2.38	1.151
TCONS_00010317		1	0	1	0						4.21283e-50	-6.882		10.57	0.245
TCONS_00011636		1	0	1	0																					1.698e-54	-7.982		2.082	0.093
TCONS_00011695		1	0	1	0																					3.70364e-32	-6.324		3.204	0.35
TCONS_00012085		1	0	1	0																					7.87305e-53	-8.065		2.175	0.04
TCONS_00012437		1	0	1	0																					5.96849e-17	-8.155		3.112	1.036
TCONS_l2_00024745		1	0	1	0																1.00246e-11	-5.297		2.908	0.198
TCONS_00012717		1	0	1	0																					9.07585e-10	-6.318		0.788	0.845
TCONS_00012534		1	0	1	0																					2.22519e-14	-5.723		1.463	0.518
TCONS_l2_00024517		1	0	1	0																										1.22523e-07	-2.209		2.038	0.44
TCONS_00012835		1	0	1	0																					7.83973e-12	-6.465		1.244	0.648
TCONS_00013668		1	0	1	0																					3.41647e-14	-7.9		1.957	0.838
TCONS_00014248		1	0	1	0																					4.56445e-14	-6.963		1.192	0.609
TCONS_l2_00025690		1	0	1	0																															1.88225e-13	-2.19		1.206	0.423
TCONS_l2_00027078		1	0	1	0																															4.40131e-18	-2.29		1.237	0.282
TCONS_00012982		1	0	1	0																					7.27249e-31	-2.752		1.158	0.378
TCONS_00013170		1	0	1	0																					1.79779e-13	-7.203		1.066	0.408
TCONS_00013585		1	0	1	0																					2.03368e-13	-7.084		1.488	0.7
TCONS_l2_00026208		1	0	1	0																					9.4875e-11	-6.33		2.201	2.224
TCONS_00014209		1	0	1	0																					4.21751e-10	-7.016		0.977	1.591
TCONS_00014220		1	0	1	0																					2.26631e-07	-6.49		1.833	3.304
TCONS_00014005		1	0	1	0																					1.45278e-13	-7.368		1.112	0.641
TCONS_00013649		1	0	1	0																					3.55668e-42	-7.349		0.762	0.024
TCONS_00014550		1	0	1	0																					9.66097e-12	-6.202		1.085	0.781
TCONS_00014557		1	0	1	0																					3.34194e-09	-6.056		0.609	0.577
TCONS_00014793		1	0	1	0																					2.40656e-11	-6.068		0.942	0.941
TCONS_00014543		1	0	1	0																					2.95349e-21	-4.017		1.275	0.44
TCONS_00015369		1	0	1	0																					3.43206e-90	-10.544		2.791	0.051
TCONS_00016575		1	0	1	0																					9.32647e-19	-6.879		2.285	0.567
TCONS_00015672		1	0	1	0																										7.64002e-22	-4.207		0.988	0.146
TCONS_l2_00029347		1	0	1	0																					2.15392e-11	-6.023		1.767	0.927
TCONS_l2_00028787		1	0	1	0	2.96661e-13	-5.609		4.881	0.102
TCONS_00016873		1	0	1	0																					6.98581e-33	-2.072		2.706	1.772
TCONS_l2_00029136		1	0	1	0											1.26373e-07	-2.261		2.613	0.541
TCONS_l2_00003945		1	0	1	0																					2.29832e-13	-5.964		0.907	0.463
TCONS_00018175		1	0	1	0																					1.98547e-13	-8.272		2.569	1.242
TCONS_00017823		1	0	1	0																					4.7977e-28	-7.121		2.842	0.357
TCONS_00017969		1	0	1	0																					3.27251e-45	-8.141		2.419	0.193
TCONS_00018503		1	0	1	0																															6.26991e-39	-5.298		0.721	0.041
TCONS_l2_00003584		1	0	1	0																					1.1506e-56	-9.723		1.151	0.006
TCONS_00018253		1	0	1	0																					3.50795e-17	-5.76		1.527	0.381
TCONS_00018604		1	0	1	0																															2.81209e-23	-3.891		1.106	0.11
TCONS_l2_00003833		1	0	1	0																					4.69097e-36	-2.106		3.511	1.294
TCONS_00020033		1	0	1	0																					1.08113e-10	-6.245		1.77	1.769
TCONS_00019602		1	0	1	0																					3.495e-83	-13.376		4.276	0.009
TCONS_00019635		1	0	1	0																															4.28135e-36	-5.883		2.957	0.214
TCONS_00019374		1	0	1	0																					1.46481e-10	-5.834		1.561	1.176
TCONS_00019383		1	0	1	0																4.85424e-09	-2.384		2.636	0.42
TCONS_00019766		1	0	1	0											9.29382e-18	-4.641		41.449	2.101
TCONS_00019767		1	0	1	0																1.11158e-10	-2.179		0.63	0.257
TCONS_00019178		1	0	1	0																3.58886e-19	-4.178		0.947	0.118
TCONS_00020754		1	0	1	0											1.23567e-21	-5.583		1.56	0.062
TCONS_00020389		1	0	1	0																					8.98318e-14	-6.838		6.294	2.789
TCONS_00020440		1	0	1	0	3.55481e-08	-4.812		15.245	0.467
TCONS_00020843		1	0	1	0																					4.99825e-17	-7.235		1.607	0.683
TCONS_00021412		1	0	1	0																					7.62481e-17	-6.57		1.979	0.608
TCONS_00020613		1	0	1	0											1.13595e-11	-7.369		2.3	0.075
TCONS_00020991		1	0	1	0											4.6215e-08	-2.357		10.55	2.235
TCONS_00021458		1	0	1	0						8.54446e-34	-2.086		3.427	1.158
TCONS_00021645		1	0	1	0																					2.73038e-53	-10.132		6.961	0.072
TCONS_l2_00007167		1	0	1	0																					5.16715e-54	-10.112		5.11	0.048
TCONS_00021918		1	0	1	0																					2.01116e-24	-7.271		1.903	0.457
TCONS_00022925		1	0	1	0																															3.89675e-58	-7.078		3.18	0.178
TCONS_00022475		1	0	1	0																3.95881e-23	-4.708		7.902	1.548
TCONS_00022492		1	0	1	0																					2.70014e-65	-10.464		3.106	0.047
TCONS_00022739		1	0	1	0																					3.29237e-41	-7.144		1.571	0.067
TCONS_00022885		1	0	1	0																					1.85517e-16	-7.146		1.289	0.481
TCONS_00023846		1	0	1	0																					6.10131e-12	-6.362		3.309	1.677
TCONS_00023882		1	0	1	0	1.60533e-10	-3.093		0.726	0.206
TCONS_00023883		1	0	1	0	2.12675e-07	-2.554		6.444	2.513
TCONS_00023320		1	0	1	0	7.05574e-09	-2.521		4.953	2.294
TCONS_00024123		1	0	1	0																					3.44695e-18	-6.775		1.11	0.276
TCONS_00023685		1	0	1	0																															1.10295e-31	-4.15		0.994	0.161
TCONS_l2_00008708		1	0	1	0																					3.75529e-21	-2.671		0.994	0.33
TCONS_00023978		1	0	1	0																					2.636e-60	-8.282		1.021	0.168
TCONS_00023539		1	0	1	0																					1.31242e-18	-5.772		2.912	0.585
TCONS_00024212		1	0	1	0											3.19374e-13	-5.663		2.069	0.047
TCONS_00023836		1	0	1	0																					8.90678e-47	-7.175		0.748	0.01
TCONS_00024596		1	0	1	0																															2.31654e-29	-5.156		1.112	0.137
TCONS_00024420		1	0	1	0																					8.70908e-54	-7.967		0.707	0.059
TCONS_00025791		1	0	1	0																															2.25497e-14	-2.621		3.325	0.853
TCONS_00025805		1	0	1	0																					1.07043e-17	-5.989		1.336	0.503
TCONS_00025161		1	0	1	0																																				2.70532e-06	-5.089		5.265	0.007
TCONS_00025613		1	0	1	0																					8.12316e-14	-5.857		1.746	0.631
TCONS_00026127		1	0	1	0																9.56443e-10	-2.69		105.597	39.977
TCONS_00025490		1	0	1	0																															9.23102e-44	-3.923		1.001	0.074
TCONS_00025506		1	0	1	0											2.05634e-10	-2.732		2.309	0.536
TCONS_00025784		1	0	1	0																										1.98169e-34	-3.763		0.847	0.144
TCONS_00025203		1	0	1	0																					7.18953e-11	-6.625		3.042	1.991
TCONS_00026274		1	0	1	0											3.27462e-17	-7.741		4.477	0.061
TCONS_l2_00011879		1	0	1	0																					8.41623e-09	-5.827		2.725	1.033
TCONS_00026585		1	0	1	0																					1.62986e-56	-11.463		1.885	0.164
TCONS_00026747		1	0	1	0																					4.16e-17	-6.921		3.829	1.213
TCONS_l2_00012688		1	0	1	0																					7.0419e-15	-6.357		1.268	0.6
TCONS_00027431		1	0	1	0																					1.9624e-11	-5.822		3.475	2.74
TCONS_00028106		1	0	1	0											4.13147e-20	-4.321		6.193	0.56
TCONS_00029076		1	0	1	0																					8.39036e-15	-5.679		1.626	0.719
TCONS_l2_00017132		1	0	1	0																1.30176e-16	-5.8		5.668	0.271
TCONS_00029157		1	0	1	0																					1.191e-17	-6.304		1.173	0.417
TCONS_00029159		1	0	1	0																					4.0062e-15	-6.239		1.132	0.843
TCONS_00029793		1	0	1	0																															1.64261e-17	-6.66		1.08	0.255
TCONS_00029350		1	0	1	0																6.8169e-13	-2.842		2.084	0.927
TCONS_00029612		1	0	1	0	3.41284e-12	-5.817		4.329	0.117
ENST00000420912		1	0	1	0																															6.12693e-34	-5.686		0.664	0.041
ENST00000447039		1	0	1	0																1.25082e-09	-3.669		2.513	0.128
ENST00000441991		1	0	1	0																					3.11122e-16	-6.602		9.767	1.481
ENST00000437088		1	0	1	0																					1.07657e-32	-7.702		5.736	1.092
ENST00000553829		1	0	1	0																					3.40153e-13	-7.368		4.49	2.186
ENST00000430518		1	0	1	0																															2.19452e-46	-5.521		1.206	0.062
ENST00000562992		1	0	1	0																					2.16746e-11	-5.992		1.583	1.191
ENST00000413185		1	0	1	0																					4.29313e-17	-3.265		1.65	0.908
ENST00000425763		1	0	1	0																					1.5536e-56	-11.594		2.465	0.016
ENST00000444346		1	0	1	0																					2.38963e-72	-10.865		2.849	0.008
ENST00000511928		1	0	1	0																					2.01791e-23	-8.068		1.066	0.269
uc003svz.1		1	0	1	0																					1.16305e-71	-4.61		5.087	0.608
ENST00000497872		1	0	1	0											2.76927e-11	-4.552		29.931	3.109
NR_110538		1	0	1	0																					6.44983e-24	-5.766		0.809	0.079
ENST00000422473		1	0	1	0																					6.93744e-21	-7.305		1.609	0.312
ENST00000457669		1	0	1	0																					1.12388e-67	-9.42		2.336	0.019
uc003zfx.3		1	0	1	0	6.24257e-19	-6.097		12.534	0.234
NR_047671	BANCR	1	0	1	0																															1.06732e-16	-4.345		1.265	0.601
uc002zbk.2		1	0	1	0																															3.1537e-22	-3.311		1.984	0.495
uc010miz.3	ANRIL	1	0	1	0											3.79503e-23	-6.715		36.043	1.144
ENST00000608290		1	0	1	0																					7.43749e-11	-6.143		1.176	0.825
ENST00000585620		1	0	1	0	4.95167e-13	-5.077		18.037	0.554
ENST00000591137		1	0	1	0	1.83485e-14	-5.759		16.916	0.474
ENST00000595748		1	0	1	0											5.39205e-07	-2.369		6.151	1.767
ENST00000514225		1	0	1	0																					6.25999e-21	-6.821		2.94	0.222
ENST00000503113		1	0	1	0																															5.97676e-31	-4.565		1.362	0.312
ENST00000507950		1	0	1	0																					1.32836e-63	-10.011		8.21	0.03
ENST00000588040		1	0	1	0																					1.4965e-09	-5.958		0.846	0.767
ENST00000444227		1	0	1	0																					9.46532e-14	-8.948		2.871	1.4
ENST00000555772		1	0	1	0											1.30237e-06	-2.438		1.488	0.243
ENST00000582780		1	0	1	0											2.99775e-09	-2.111		5.545	1.661
ENST00000578285	CYP4F35P	1	0	1	0																1.34607e-16	-5.473		1.9	0.096
ENST00000453998	CYP4F59P	1	0	1	0											2.88707e-07	-2.135		1.651	0.504
NR_024031	DANCR	1	0	1	0																					1.66969e-75	-2.094		40.53	11.771
NR_047482	DOCK9-AS2	1	0	1	0																					5.12287e-15	-6.146		0.805	0.263
ENST00000579431	GATA6-AS1	1	0	1	0																															1.61938e-41	-4.602		1.861	0.126
ENST00000452565	GS1-124K5.4	1	0	1	0																					1.81534e-12	-5.785		2.233	1.078
NR_047504	HOXC-AS1	1	0	1	0																					1.74997e-15	-5.769		1.971	0.799
NR_024100	LINC00323	1	0	1	0																					1.60316e-17	-3.148		0.751	0.236
NR_038433	LINC00330	1	0	1	0																2.08442e-26	-5.608		0.72	0.057
ENST00000427717	LINC00379	1	0	1	0																					2.27435e-57	-8.851		5.566	0.178
NR_047508	LINC00417	1	0	1	0																1.35405e-16	-5.277		2.007	0.117
NR_026807	LINC00472	1	0	1	0																					2.70942e-62	-2.591		4.4	0.961
NR_051960	LINC00568	1	0	1	0																2.36875e-12	-3.326		1.778	0.19
ENST00000557359	LINC00645	1	0	1	0																					4.84264e-61	-7.965		6.287	0.336
ENST00000608792	LINC00702	1	0	1	0																															1.71675e-30	-3.037		0.789	0.093
ENST00000432535	LINC00844	1	0	1	0																					2.69171e-21	-6.751		4.045	0.997
ENST00000447936	LINC00864	1	0	1	0																					1.41319e-32	-5.247		3.754	0.411
NR_046368	LINC01023	1	0	1	0																					8.69918e-15	-6.326		3.212	1.325
NR_037596	LINC01061	1	0	1	0																					4.85085e-15	-5.157		1.204	1.113
NR_110374	LINC01159	1	0	1	0																					7.12679e-41	-5.32		12.005	1.104
NR_034034	LOC100288748	1	0	1	0																					4.41364e-68	-8.322		0.934	0.031
NR_036533	LOC100499489	1	0	1	0																					1.55543e-07	-6.121		0.549	0.888
NR_037847	LOC100506730	1	0	1	0																					1.06679e-12	-8.228		1.996	1.152
uc022asc.1	LOC100506990	1	0	1	0	9.30828e-07	-2.021		4.81	1.762
NR_038942	LOC100630918	1	0	1	0																					2.67159e-14	-6.701		1.657	0.653
NR_104626	LOC101928370	1	0	1	0																															9.60456e-45	-3.384		1.13	0.129
NR_026954	LOC90246	1	0	1	0																															1.40602e-13	-2.451		1.236	0.379
ENST00000556013	PTCSC3	1	0	1	0																					1.5285e-63	-8.614		2.651	0.107
ENST00000578367		1	0	1	0																					7.17014e-80	-10.504		4.635	0.028
ENST00000517706		1	0	1	0																					1.63347e-29	-6.884		1.317	0.087
ENST00000592381		1	0	1	0																					2.62307e-16	-8.232		4.614	1.653
ENST00000609270		1	0	1	0																					3.26931e-11	-6.503		2.845	1.891
ENST00000512210		1	0	1	0																					2.12733e-06	-4.296		0.769	2.677
ENST00000430471		1	0	1	0																					4.54983e-07	-4.943		1.112	1.983
ENST00000456034		1	0	1	0																					2.53835e-50	-8.728		4.724	0.339
ENST00000576871		1	0	1	0																					6.35375e-19	-6.845		3.21	0.786
ENST00000523301		1	0	1	0	7.51877e-07	-2.288		2.769	0.74
ENST00000436340		1	0	1	0																					2.31043e-66	-8.92		5.478	0.025
ENST00000520085		1	0	1	0																					4.64613e-14	-7.304		4.614	2.315
ENST00000560900		1	0	1	0																					1.71461e-71	-10.353		1.461	0.005
ENST00000486726		1	0	1	0																					7.21738e-20	-6.832		1.03	0.334
ENST00000518973		1	0	1	0																										7.37415e-41	-4.656		0.849	0.134
ENST00000411798		1	0	1	0						6.21467e-28	-4.374		3.969	0.524
ENST00000610223		1	0	1	0											9.40017e-06	-2.219		1.745	0.497
ENST00000566645		1	0	1	0																					5.38078e-27	-6.807		3.517	0.414
ENST00000558269		1	0	1	0																					1.66699e-24	-5.874		1.522	0.26
ENST00000551032		1	0	1	0																															3.41695e-55	-5.854		1.976	0.177
ENST00000507152		1	0	1	0																					6.81052e-25	-4.74		0.688	0.085
NR_110614		1	0	1	0																					3.6647e-15	-6.207		1.624	0.529
ENST00000418270		1	0	1	0																					2.08177e-66	-8.329		3.627	0.123
ENST00000505053		1	0	1	0																					7.54021e-104	-12.964		5.09	0.011
ENST00000425666		1	0	1	0																					1.89371e-08	-6.249		1.42	2.394
ENST00000417801		1	0	1	0																					6.43863e-13	-6.02		2.738	1.258
ENST00000524613		1	0	1	0											4.17017e-22	-5.902		4.462	0.191
ENST00000415106		1	0	1	0																					4.53026e-15	-8.168		8.608	1.933
ENST00000522373		1	0	1	0																					4.26214e-11	-6.576		2.105	1.583
ENST00000426023		1	0	1	0											7.39683e-11	-2.478		1.917	0.253
ENST00000592638		1	0	1	0																					8.56107e-18	-7.267		1.522	0.44
ENST00000482985		1	0	1	0																					5.3077e-14	-6.351		1.156	0.532
ENST00000423864		1	0	1	0																					9.28064e-46	-7.958		2.773	0.247
ENST00000592842		1	0	1	0																					4.7196e-68	-9.999		1.64	0.012
ENST00000533082		1	0	1	0																					1.42521e-72	-9.489		3.067	0.018
ENST00000525575		1	0	1	0																					2.58592e-35	-7.331		2.289	0.128
ENST00000521188		1	0	1	0																					6.86344e-21	-6.363		2.54	0.514
ENST00000417705		1	0	1	0																					6.07103e-21	-2.827		1.082	0.823
ENST00000434540		1	0	1	0																					1.33412e-52	-8.32		2.241	0.037
ENST00000421142		1	0	1	0	3.48555e-17	-5.906		10.905	0.207
ENST00000551421		1	0	1	0											2.74627e-10	-2.111		3.876	1.191
ENST00000549330		1	0	1	0																					1.94696e-19	-8.132		6.64	0.936
ENST00000572790		1	0	1	0																					2.2652e-15	-5.596		2.091	0.865
ENST00000482617		1	0	1	0																					2.66404e-13	-5.712		2.129	0.541
ENST00000508564		1	0	1	0																					8.06765e-44	-2.426		23.643	5.216
ENST00000504278		1	0	1	0																					2.09631e-38	-3.163		2.824	0.403
ENST00000552524		1	0	1	0																					5.61509e-99	-15.58		1.621	0.001
ENST00000433614		1	0	1	0																										6.12447e-23	-4.405		1.223	0.196
ENST00000538731		1	0	1	0																					2.1087e-17	-6.331		1.189	0.426
ENST00000417299		1	0	1	0											9.55382e-13	-3.263		9.507	1.438
ENST00000577621		1	0	1	0																					1.32648e-22	-7.296		2.598	0.057
ENST00000448624		1	0	1	0																															8.98446e-23	-2.592		2.021	0.637
ENST00000454331		1	0	1	0																					2.93882e-14	-5.725		1.877	0.727
ENST00000423408		1	0	1	0																					6.79193e-15	-6.451		1.416	0.632
NR_109995		1	0	1	0																					7.28385e-13	-6.982		2.564	1.262
NR_109990		1	0	1	0																					7.44766e-14	-7.935		3.141	1.467
ENST00000553682		1	0	1	0																6.51331e-09	-2.62		3.31	0.816
uc001tvs	TBX5-AS1	1	0	1	0																															5.2299e-38	-2.783		4.294	0.681
ENST00000451478	TEX41	1	0	1	0																					7.23404e-08	-2.261		3.679	3.372
NR_102761	TRIM52-AS1	1	0	1	0																					6.56616e-30	-2.401		8.905	3.973
ENST00000503051	USP46-AS1	1	0	1	0																					2.15786e-19	-7.395		3.081	0.633
NR_023920	WT1-AS	1	0	1	0																																				2.7155e-09	-4.736		6.397	0.606
NR_110300	ZNF503-AS2	1	0	1	0																					4.90489e-49	-2.347		3.275	0.915
ENST00000299997	ZNF667-AS1	1	0	1	0											1.40702e-16	-2.345		6.462	1.274
TCONS_l2_00002569		1	0	0	1													0.00048	3.461	1.357
TCONS_l2_00001489		1	0	0	1																							0.00153	1.649	1.71
TCONS_00001200		1	0	0	1																							0.00921	5.149	0.16
TCONS_00000027		1	0	0	1																							0.01306	8.534	7.029
TCONS_00004361		1	0	0	1																												0.00328	0.166	0.006
TCONS_l2_00028315		1	0	0	1													0.01493	7.118	7.876
TCONS_l2_00003637		1	0	0	1								0.04007	1.952	2.454
TCONS_l2_00004575	MALAT1	1	0	0	1													0.00947	42.593	11.822
TCONS_00023060		1	0	0	1													0.00048	6.005	3.962
TCONS_00023705		1	0	0	1																							0	11.285	5.054
TCONS_00024498		1	0	0	1																							0	2.18	0.26
TCONS_00026239		1	0	0	1																		0	1.202	0.213
TCONS_00027265		1	0	0	1																							0.02186	2.888	3.607
TCONS_l2_00016266		1	0	0	1													0.00578	4.944	4.737
TCONS_00029181		1	0	0	1													0	3.578	2.44
ENST00000604250		1	0	0	1																							0.00153	54.96	25.303
ENST00000398554		1	0	0	1													0.00129	1.152	0.868
ENST00000419664		1	0	0	1																							0.00862	1.342	0.208
ENST00000542064		1	0	0	1																							0.01028	4.506	0.107
ENST00000411694		1	0	0	1																							0	0.611	0.168
uc001ldf	EMX2OS	1	0	0	1																							0.02426	9.623	17.065
ENST00000442037	H19	1	0	0	1																																						0.01419	477.824	173.084
ENST00000448579	LINC00114	1	0	0	1													0.03121	1.163	0.314
ENST00000504119	LINC00617	1	0	0	1								0	0.572	0.294
ENST00000579012	LINC00668	1	0	0	1								0.00202	0.297	0.004
ENST00000540375	LINC01001	1	0	0	1			0	14.54	9.33
NR_027179	LRRC75A-AS1	1	0	0	1													0.00209	372.868	347.074
uc001iun	PTCHD3P1	1	0	0	1								0.04437	7.368	7.187
ENST00000418395		1	0	0	1																							0.00153	2.169	0.08
ENST00000573341		1	0	0	1								0.04531	1.74	2.333
ENST00000510795		1	0	0	1																																						0	0.685	2.324
ENST00000592157		1	0	0	1													0.04943	10.916	9.982
NR_110112		1	0	0	1													0	6.315	8.31
ENST00000566582		1	0	0	1			0.01501	0.583	0.004
ENST00000434593		1	0	0	1																		0	0.977	0.563
ENST00000589395		1	0	0	1																							0	3.151	1.004
ENST00000458437		1	0	0	1																							0	37.244	5.986
ENST00000428750		1	0	0	1																							0.02804	30.033	12.728
ENST00000602955		1	0	0	1																		0.0308	41.42	23.31
ENST00000542586	TP53TG1	1	0	0	1													0.01126	22.952	33.116
ENST00000537269		1	0	0	1													0	6.09	4.838
ENST00000455701	ZNF295-AS1	1	0	0	1																																	0	0.251	0.119

## Sheet: SuppTable3
Supplementary Table 3 | Differentially expressed protein coding genes. Genes are sorted by the number of cancers in which a gene is differentially expressed (DE). For each cancer, 1 = up-regulated, -1 = down-regulated, 0 = not significant.
TranscriptID	GeneSymbol	TotalAltered	TotalUpDE	TotalDownDE	BLCA	BRCA	CRC	HNSC	KIRC	LUAD	LUSC	UCEC
NM_001278610	MYBL2	8	8	0	1	1	1	1	1	1	1	1
NM_007168	ABCA8	8	0	8	-1	-1	-1	-1	-1	-1	-1	-1
NM_000668	ADH1B	8	0	8	-1	-1	-1	-1	-1	-1	-1	-1
NM_000587	C7	8	0	8	-1	-1	-1	-1	-1	-1	-1	-1
NM_001801	CDO1	8	0	8	-1	-1	-1	-1	-1	-1	-1	-1
NM_144617	HSPB6	8	0	8	-1	-1	-1	-1	-1	-1	-1	-1
NM_153267	MAMDC2	8	0	8	-1	-1	-1	-1	-1	-1	-1	-1
NM_001199159	PI16	8	0	8	-1	-1	-1	-1	-1	-1	-1	-1
NM_001284301	ANLN	7	7	0	1	1	1	0	1	1	1	1
NM_001216	CA9	7	7	0	1	0	1	1	1	1	1	1
NM_001256099	CTHRC1	7	7	0	0	1	1	1	1	1	1	1
NM_001243089	FOXM1	7	7	0	1	1	0	1	1	1	1	1
NM_001282963	HJURP	7	7	0	1	1	0	1	1	1	1	1
NM_178229	IQGAP3	7	7	0	1	1	1	0	1	1	1	1
NM_014875	KIF14	7	7	0	1	1	1	1	0	1	1	1
NM_005940	MMP11	7	7	0	1	1	1	1	0	1	1	1
NM_007224	NXPH4	7	7	0	1	0	1	1	1	1	1	1
NM_012112	TPX2	7	7	0	1	1	1	0	1	1	1	1
NM_181800	UBE2C	7	7	0	1	1	1	0	1	1	1	1
NM_001290052	UHRF1	7	7	0	1	1	1	0	1	1	1	1
NM_001172897	CAV1	7	1	6	-1	-1	-1	0	1	-1	-1	-1
NM_014365	HSPB8	7	1	6	-1	0	-1	-1	1	-1	-1	-1
NM_139125	MASP1	7	1	6	-1	-1	-1	0	1	-1	-1	-1
NM_015429	ABI3BP	7	0	7	-1	-1	-1	-1	0	-1	-1	-1
NM_000669	ADH1C	7	0	7	-1	-1	-1	-1	-1	-1	-1	0
NM_020977	ANK2	7	0	7	-1	-1	-1	-1	-1	0	-1	-1
NM_031911	C1QTNF7	7	0	7	-1	-1	-1	0	-1	-1	-1	-1
NM_032411	C2orf40	7	0	7	-1	-1	-1	-1	-1	-1	-1	0
NM_032963	CCL14	7	0	7	-1	-1	-1	-1	0	-1	-1	-1
NM_002989	CCL21	7	0	7	-1	-1	-1	-1	-1	0	-1	-1
NM_001185056	CLDN11	7	0	7	-1	-1	-1	-1	-1	-1	-1	0
NM_003278	CLEC3B	7	0	7	-1	-1	-1	-1	0	-1	-1	-1
NM_001207011	CNTFR	7	0	7	-1	-1	-1	-1	-1	-1	-1	0
NM_001122951	DARC	7	0	7	-1	-1	-1	-1	0	-1	-1	-1
NM_001927	DES	7	0	7	-1	-1	-1	0	-1	-1	-1	-1
NM_001256560	DNASE1L3	7	0	7	-1	-1	-1	-1	-1	-1	-1	0
NM_001282713	FAM107A	7	0	7	-1	-1	-1	-1	0	-1	-1	-1
NM_021902	FXYD1	7	0	7	-1	-1	-1	-1	0	-1	-1	-1
NM_002126	HLF	7	0	7	-1	-1	-1	-1	0	-1	-1	-1
NM_002404	MFAP4	7	0	7	-1	-1	-1	0	-1	-1	-1	-1
NM_007351	MMRN1	7	0	7	-1	-1	-1	-1	0	-1	-1	-1
NM_001166104	NR3C2	7	0	7	-1	-1	-1	-1	-1	0	-1	-1
NM_002612	PDK4	7	0	7	-1	-1	-1	-1	0	-1	-1	-1
NM_021965	PGM5	7	0	7	-1	-1	-1	-1	0	-1	-1	-1
NM_001184744	PTH1R	7	0	7	-1	-1	-1	0	-1	-1	-1	-1
NM_004657	SDPR	7	0	7	-1	-1	-1	-1	0	-1	-1	-1
NM_019105	TNXB	7	0	7	-1	-1	-1	-1	0	-1	-1	-1
NM_001018011	ZBTB16	7	0	7	-1	-1	-1	-1	0	-1	-1	-1
NM_018154	ASF1B	6	6	0	1	1	0	0	1	1	1	1
NM_001256834	AURKB	6	6	0	1	1	0	0	1	1	1	1
NM_001012270	BIRC5	6	6	0	1	1	0	0	1	1	1	1
NM_001278616	BUB1	6	6	0	1	1	0	0	1	1	1	1
NM_004701	CCNB2	6	6	0	1	1	0	0	1	1	1	1
NM_001178011	CDC45	6	6	0	1	1	0	0	1	1	1	1
NM_001254	CDC6	6	6	0	1	1	0	0	1	1	1	1
NM_152562	CDCA2	6	6	0	1	1	0	0	1	1	1	1
NM_001130851	CDKN3	6	6	0	1	1	0	0	1	1	1	1
NM_030928	CDT1	6	6	0	1	1	0	0	1	1	1	1
NM_016343	CENPF	6	6	0	1	1	0	0	1	1	1	1
NM_001127182	CEP55	6	6	0	1	1	0	0	1	1	1	1
NM_080630	COL11A1	6	6	0	1	1	1	1	0	1	1	0
NM_000088	COL1A1	6	6	0	0	1	1	1	1	1	1	0
NM_001898	CST1	6	6	0	1	1	1	0	0	1	1	1
NM_014750	DLGAP5	6	6	0	1	1	0	0	1	1	1	1
NM_001135604	ESM1	6	6	0	1	1	1	1	1	0	0	1
NM_001142704	FAM111B	6	6	0	1	1	0	0	1	1	1	1
NM_001195228	FAM64A	6	6	0	1	1	0	0	1	1	1	1
NM_052899	GPRIN1	6	6	0	1	1	0	1	1	1	1	0
NM_016426	GTSE1	6	6	0	1	1	0	0	1	1	1	1
NM_014736	KIAA0101	6	6	0	1	1	0	0	1	1	1	1
NM_001265577	KIF18B	6	6	0	1	1	1	0	0	1	1	1
NM_018012	KIF26B	6	6	0	1	1	1	1	0	1	1	0
NM_002263	KIFC1	6	6	0	1	1	0	0	1	1	1	1
NM_001256692	MELK	6	6	0	1	1	0	0	1	1	1	1
NM_001145966	MKI67	6	6	0	1	1	0	0	1	1	1	1
NM_004994	MMP9	6	6	0	0	1	0	1	1	1	1	1
NM_002497	NEK2	6	6	0	1	1	0	0	1	1	1	1
NM_031423	NUF2	6	6	0	1	1	0	0	1	1	1	1
NM_001243144	NUSAP1	6	6	0	1	1	0	0	1	1	1	1
NM_001278945	PBK	6	6	0	1	1	0	0	1	1	1	1
NM_005030	PLK1	6	6	0	1	1	0	0	1	1	1	1
NM_004219	PTTG1	6	6	0	1	1	0	0	1	1	1	1
NM_004260	RECQL4	6	6	0	1	1	1	0	0	1	1	1
NM_001034	RRM2	6	6	0	1	1	0	0	1	1	1	1
NM_178448	SAPCD2	6	6	0	1	1	1	0	0	1	1	1
NM_000582	SPP1	6	6	0	1	1	0	1	0	1	1	1
NM_001067	TOP2A	6	6	0	1	1	0	0	1	1	1	1
NM_173636	WDR62	6	6	0	1	1	1	0	0	1	1	1
NM_001030059	PPAPDC1A	6	5	1	1	1	0	1	-1	1	1	0
NM_003725	HSD17B6	6	2	4	-1	1	-1	1	0	-1	-1	0
NM_003613	CILP	6	1	5	-1	0	-1	-1	-1	1	0	-1
NM_014702	KIAA0408	6	1	5	-1	-1	-1	0	1	-1	-1	0
NM_139284	LGI4	6	1	5	-1	-1	-1	0	1	0	-1	-1
NM_001167959	TMEM178A	6	1	5	0	-1	0	-1	-1	-1	-1	1
NM_003881	WISP2	6	1	5	-1	0	-1	0	1	-1	-1	-1
NM_000667	ADH1A	6	0	6	-1	-1	-1	0	-1	-1	-1	0
NM_170697	ALDH1A2	6	0	6	0	-1	0	-1	-1	-1	-1	-1
NM_001277732	AOC3	6	0	6	-1	-1	-1	0	0	-1	-1	-1
NM_001159	AOX1	6	0	6	-1	-1	-1	-1	0	0	-1	-1
NM_000702	ATP1A2	6	0	6	-1	-1	-1	-1	0	-1	-1	0
NM_001098514	C16orf89	6	0	6	-1	-1	-1	-1	-1	0	-1	0
NM_001190972	C8orf88	6	0	6	-1	-1	-1	0	0	-1	-1	-1
NM_000717	CA4	6	0	6	-1	-1	-1	0	-1	-1	-1	0
NM_001232	CASQ2	6	0	6	-1	-1	-1	0	0	-1	-1	-1
NM_001266	CES1	6	0	6	-1	-1	-1	0	0	-1	-1	-1
NM_001928	CFD	6	0	6	-1	-1	-1	-1	0	-1	-1	0
NM_001190456	CORO2B	6	0	6	0	-1	-1	0	-1	-1	-1	-1
NM_024913	CPED1	6	0	6	-1	-1	-1	0	0	-1	-1	-1
NM_018058	CRTAC1	6	0	6	0	-1	-1	-1	-1	-1	-1	0
NM_001178134	CXCL12	6	0	6	-1	-1	-1	-1	0	0	-1	-1
NM_001937	DPT	6	0	6	-1	-1	-1	-1	-1	0	0	-1
NM_000504	F10	6	0	6	-1	-1	0	-1	0	-1	-1	-1
NM_001127608	FAM189A2	6	0	6	-1	-1	-1	-1	0	-1	-1	0
NM_145793	GFRA1	6	0	6	-1	0	-1	-1	0	-1	-1	-1
NM_178172	GPIHBP1	6	0	6	-1	-1	-1	0	0	-1	-1	-1
NM_201592	GPM6A	6	0	6	-1	-1	-1	0	0	-1	-1	-1
NM_002084	GPX3	6	0	6	-1	-1	-1	-1	0	-1	-1	0
NM_000851	GSTM5	6	0	6	-1	-1	-1	0	0	-1	-1	-1
NM_001166107	HMGCS2	6	0	6	0	-1	-1	-1	-1	-1	-1	0
NM_014424	HSPB7	6	0	6	-1	-1	-1	0	-1	0	-1	-1
NM_001093772	KIT	6	0	6	-1	-1	-1	-1	-1	0	-1	0
NM_001256542	LIMS2	6	0	6	-1	-1	-1	0	0	-1	-1	-1
NM_198578	LRRK2	6	0	6	-1	0	-1	-1	0	-1	-1	-1
NM_006691	LYVE1	6	0	6	-1	-1	-1	0	0	-1	-1	-1
NM_176870	MT1M	6	0	6	-1	-1	-1	0	-1	-1	-1	0
NM_000261	MYOC	6	0	6	-1	-1	-1	-1	0	-1	-1	0
NM_001007097	NTRK2	6	0	6	-1	-1	-1	0	-1	-1	0	-1
NM_013363	PCOLCE2	6	0	6	-1	-1	-1	-1	0	-1	-1	0
NM_001012973	PLAC9	6	0	6	-1	-1	-1	-1	0	-1	-1	0
NM_013261	PPARGC1A	6	0	6	-1	-1	-1	-1	-1	-1	0	0
NM_000959	PTGFR	6	0	6	-1	-1	0	0	-1	-1	-1	-1
NM_001286201	RERGL	6	0	6	-1	-1	-1	0	-1	0	-1	-1
NM_173833	SCARA5	6	0	6	-1	-1	-1	-1	0	-1	-1	0
NM_001142348	SCN4B	6	0	6	-1	-1	-1	0	0	-1	-1	-1
NM_002976	SCN7A	6	0	6	-1	-1	-1	0	0	-1	-1	-1
NM_001258288	SELENBP1	6	0	6	-1	0	-1	-1	-1	-1	-1	0
NM_003012	SFRP1	6	0	6	-1	-1	-1	-1	-1	0	0	-1
NM_001289136	SLIT2	6	0	6	-1	0	-1	0	-1	-1	-1	-1
NM_003062	SLIT3	6	0	6	-1	-1	-1	0	0	-1	-1	-1
NM_006434	SORBS1	6	0	6	-1	-1	-1	-1	0	0	-1	-1
NM_133477	SYNPO2	6	0	6	-1	-1	-1	-1	0	0	-1	-1
NM_001195684	TGFBR3	6	0	6	-1	-1	0	-1	0	-1	-1	-1
NM_018286	TMEM100	6	0	6	-1	-1	-1	-1	0	-1	-1	0
NM_022648	TNS1	6	0	6	-1	-1	-1	0	0	-1	-1	-1
NM_014312	VSIG2	6	0	6	0	-1	-1	-1	-1	-1	-1	0
NM_001206846	ASPM	5	5	0	1	1	0	0	0	1	1	1
NM_198437	AURKA	5	5	0	1	1	0	0	0	1	1	1
NM_001211	BUB1B	5	5	0	1	1	0	0	0	1	1	1
NM_025108	C16orf59	5	5	0	1	1	0	0	0	1	1	1
NM_182486	C1QTNF6	5	5	0	1	1	0	1	0	1	1	0
NM_144508	CASC5	5	5	0	1	1	0	0	0	1	1	1
NM_031966	CCNB1	5	5	0	1	1	0	0	0	1	1	1
NM_001255	CDC20	5	5	0	1	1	0	0	0	1	1	1
NM_031299	CDCA3	5	5	0	1	1	0	0	0	1	1	1
NM_080668	CDCA5	5	5	0	1	1	0	0	0	1	1	1
NM_018101	CDCA8	5	5	0	1	1	0	0	0	1	1	1
NM_001786	CDK1	5	5	0	1	1	0	0	0	1	1	1
NM_058195	CDKN2A	5	5	0	0	0	1	0	1	1	1	1
NM_001042426	CENPA	5	5	0	1	1	0	0	0	1	1	1
NM_001286734	CENPE	5	5	0	1	1	0	0	0	1	1	1
NM_152515	CKAP2L	5	5	0	1	1	0	0	0	1	1	1
NM_001190481	CLSPN	5	5	0	1	1	0	0	0	1	1	1
NM_001322	CST2	5	5	0	0	1	1	0	0	1	1	1
NM_006419	CXCL13	5	5	0	0	1	0	1	1	1	1	0
NM_001114120	DEPDC1	5	5	0	1	1	0	0	0	1	1	1
NM_001145208	DEPDC1B	5	5	0	1	1	0	0	0	1	1	1
NM_004091	E2F2	5	5	0	1	1	0	0	0	1	1	1
NM_203394	E2F7	5	5	0	1	1	0	1	0	0	1	1
NM_001017420	ESCO2	5	5	0	1	1	0	0	0	1	1	1
NM_012291	ESPL1	5	5	0	1	1	0	0	0	1	1	1
NM_003686	EXO1	5	5	0	1	1	0	0	0	1	1	1
NM_152998	EZH2	5	5	0	1	1	0	0	0	1	1	1
NM_001100910	FAM72B	5	5	0	1	1	0	0	0	1	1	1
NM_021067	GINS1	5	5	0	1	1	0	0	0	1	1	1
NM_001142557	HMMR	5	5	0	1	1	0	0	0	1	1	1
NM_004523	KIF11	5	5	0	1	1	0	0	0	1	1	1
NM_020242	KIF15	5	5	0	1	1	0	0	0	1	1	1
NM_004856	KIF23	5	5	0	1	1	0	0	0	1	1	1
NM_006845	KIF2C	5	5	0	1	1	0	0	0	1	1	1
NM_130830	LRRC15	5	5	0	0	1	1	1	0	1	1	0
NM_018518	MCM10	5	5	0	1	1	0	0	0	1	1	1
NM_001093725	MEX3A	5	5	0	1	0	1	0	0	1	1	1
NM_001145938	MMP1	5	5	0	0	1	1	1	0	1	1	0
NM_002425	MMP10	5	5	0	0	1	1	1	0	1	1	0
NM_002427	MMP13	5	5	0	1	1	0	1	0	1	1	0
NM_002422	MMP3	5	5	0	0	1	1	1	0	1	1	0
NM_001281711	NCAPH	5	5	0	1	1	0	0	0	1	1	1
NM_006101	NDC80	5	5	0	1	1	0	0	1	1	1	0
NM_014321	ORC6	5	5	0	1	0	1	0	0	1	1	1
NM_206954	PRAME	5	5	0	0	1	0	1	0	1	1	1
NM_001267580	PRC1	5	5	0	1	1	0	0	0	1	1	1
NM_001282279	PYCR1	5	5	0	1	1	0	0	0	1	1	1
NM_001164269	RAD51	5	5	0	1	1	0	0	0	1	1	1
NM_024745	SHCBP1	5	5	0	1	1	0	0	0	1	1	1
NM_145060	SKA1	5	5	0	1	0	0	0	1	1	1	1
NM_006461	SPAG5	5	5	0	1	1	0	0	0	1	1	1
NM_001206855	TFR2	5	5	0	1	1	1	0	0	1	1	0
NM_003258	TK1	5	5	0	1	1	0	0	0	1	1	1
NM_004237	TRIP13	5	5	0	1	1	1	0	0	1	1	0
NM_001278324	TROAP	5	5	0	1	1	0	0	0	1	1	1
NM_003318	TTK	5	5	0	1	1	0	0	0	1	1	1
NM_014176	UBE2T	5	5	0	1	1	0	0	0	1	1	1
NM_001204870	WISP1	5	5	0	0	1	1	1	0	1	1	0
NM_007129	ZIC2	5	5	0	1	0	1	1	0	0	1	1
NM_001005413	ZWINT	5	5	0	1	1	0	0	0	1	1	1
NM_001145272	ADAMDEC1	5	4	1	0	1	-1	0	1	1	1	0
NM_001261438	ETV4	5	4	1	1	0	1	0	-1	1	1	0
NM_013445	GAD1	5	4	1	0	0	1	1	-1	0	1	1
NM_138768	MYEOV	5	4	1	0	-1	1	0	1	1	1	0
NM_001135936	POSTN	5	4	1	0	1	0	1	1	0	1	-1
NM_006946	SPTBN2	5	4	1	1	0	1	0	-1	1	1	0
NM_001290096	TMPRSS4	5	4	1	0	1	0	0	-1	1	1	1
NM_003658	BARX2	5	3	2	0	0	-1	-1	1	1	1	0
NM_001012965	KLK6	5	3	2	0	-1	1	0	-1	1	1	0
NM_001172633	OLR1	5	3	2	0	1	1	1	0	-1	-1	0
NM_018354	TMEM74B	5	3	2	1	0	1	0	1	-1	-1	0
NM_032865	TNS4	5	3	2	0	-1	1	0	-1	1	1	0
NM_004378	CRABP1	5	2	3	0	-1	-1	0	-1	0	1	1
NM_001243080	ELF5	5	2	3	0	-1	1	0	-1	0	-1	1
NM_001199893	ACTG2	5	1	4	-1	-1	-1	0	1	0	0	-1
NM_001289909	CD36	5	1	4	0	-1	-1	0	1	-1	-1	0
NM_002246	KCNK3	5	1	4	-1	0	-1	0	1	-1	-1	0
NM_002644	PIGR	5	1	4	0	-1	0	-1	-1	0	-1	1
NM_016619	PLAC8	5	1	4	0	0	-1	-1	1	-1	-1	0
NM_178013	PRIMA1	5	1	4	-1	-1	-1	0	1	0	0	-1
NM_000336	SCNN1B	5	1	4	0	0	-1	-1	-1	0	-1	1
NM_001039	SCNN1G	5	1	4	0	0	-1	0	-1	-1	-1	1
NM_022454	SOX17	5	1	4	-1	-1	0	0	0	-1	-1	1
NM_014178	STXBP6	5	1	4	0	-1	0	-1	0	-1	-1	1
NM_080283	ABCA9	5	0	5	-1	-1	-1	0	0	-1	-1	0
NM_153202	ADAM33	5	0	5	-1	-1	-1	0	0	0	-1	-1
NM_007037	ADAMTS8	5	0	5	-1	-1	-1	0	0	-1	-1	0
NM_207517	ADAMTSL3	5	0	5	-1	0	-1	0	0	-1	-1	-1
NM_001288607	ADAMTSL4	5	0	5	-1	-1	0	0	0	-1	-1	-1
NM_032049	AGTR1	5	0	5	-1	-1	-1	0	0	-1	-1	0
NM_144497	AKAP12	5	0	5	-1	-1	-1	0	0	0	-1	-1
NM_000689	ALDH1A1	5	0	5	0	-1	-1	-1	0	-1	0	-1
NM_001142649	ANO5	5	0	5	-1	0	-1	-1	-1	0	-1	0
NM_001128085	ASPA	5	0	5	-1	-1	-1	0	0	-1	-1	0
NM_032827	ATOH8	5	0	5	-1	-1	0	0	0	-1	-1	-1
NM_000055	BCHE	5	0	5	-1	-1	-1	0	0	-1	0	-1
NM_021073	BMP5	5	0	5	-1	-1	-1	0	-1	0	-1	0
NM_001252507	C14orf132	5	0	5	0	0	-1	0	-1	-1	-1	-1
NM_005181	CA3	5	0	5	-1	-1	0	-1	0	-1	-1	0
NM_133459	CCBE1	5	0	5	0	0	-1	0	-1	-1	-1	-1
NM_015621	CCDC69	5	0	5	-1	-1	-1	0	0	0	-1	-1
NM_032866	CGNL1	5	0	5	-1	0	0	-1	-1	-1	-1	0
NM_003277	CLDN5	5	0	5	-1	-1	-1	0	0	-1	-1	0
NM_006344	CLEC10A	5	0	5	-1	-1	-1	-1	0	0	-1	0
NM_016929	CLIC5	5	0	5	0	-1	0	-1	-1	-1	-1	0
NM_001864	COX7A1	5	0	5	-1	-1	-1	-1	0	0	-1	0
NM_001289807	CRYAB	5	0	5	-1	-1	-1	0	0	-1	0	-1
NM_001037160	CYS1	5	0	5	0	0	-1	0	-1	-1	-1	-1
NM_052943	FAM46B	5	0	5	-1	0	-1	0	-1	-1	-1	0
NM_001170807	FHL5	5	0	5	-1	-1	0	0	0	-1	-1	-1
NM_001460	FMO2	5	0	5	0	-1	-1	-1	0	-1	-1	0
NM_001114171	FOSB	5	0	5	-1	-1	0	0	0	-1	-1	-1
NM_001244960	FRMD3	5	0	5	-1	-1	-1	0	0	-1	-1	0
NM_020692	GALNT16	5	0	5	-1	0	-1	-1	-1	0	-1	0
NM_004962	GDF10	5	0	5	-1	-1	0	-1	0	-1	-1	0
NM_001242460	GHR	5	0	5	-1	-1	-1	0	0	-1	0	-1
NM_052847	GNG7	5	0	5	-1	0	-1	-1	0	0	-1	-1
NM_198827	GPR133	5	0	5	-1	-1	0	0	0	-1	-1	-1
NM_152796	HIF3A	5	0	5	-1	-1	-1	0	0	-1	-1	0
NM_001146728	HRASLS5	5	0	5	-1	-1	-1	0	0	-1	-1	0
NM_001039792	HRCT1	5	0	5	-1	-1	-1	0	0	-1	-1	0
NM_001546	ID4	5	0	5	-1	-1	0	-1	0	-1	-1	0
NM_001199641	IL33	5	0	5	-1	-1	0	-1	0	-1	-1	0
NM_001199219	INMT	5	0	5	-1	-1	0	0	0	-1	-1	-1
NM_030569	ITIH5	5	0	5	-1	-1	0	0	0	-1	-1	-1
NM_004235	KLF4	5	0	5	-1	-1	-1	0	0	-1	0	-1
NM_002310	LIFR	5	0	5	-1	-1	-1	0	0	0	-1	-1
NM_001243610	LMO3	5	0	5	-1	-1	-1	0	-1	0	-1	0
NM_012134	LMOD1	5	0	5	-1	-1	-1	0	0	0	-1	-1
NM_203422	LRRN4CL	5	0	5	-1	-1	-1	-1	0	0	0	-1
NM_001042545	LTBP4	5	0	5	-1	-1	0	0	0	-1	-1	-1
NM_002747	MAPK4	5	0	5	-1	0	-1	0	-1	-1	-1	0
NM_145015	MRGPRF	5	0	5	-1	-1	-1	0	-1	0	0	-1
NM_002474	MYH11	5	0	5	-1	-1	-1	0	0	0	-1	-1
NM_019856	MYOM1	5	0	5	-1	-1	-1	-1	0	0	0	-1
NM_000906	NPR1	5	0	5	-1	-1	0	0	0	-1	-1	-1
NM_173157	NR4A1	5	0	5	-1	-1	0	0	0	-1	-1	-1
NM_014917	NTNG1	5	0	5	-1	0	-1	0	-1	-1	-1	0
NM_007225	NXPH3	5	0	5	-1	0	-1	0	0	-1	-1	-1
NM_001143839	PDE2A	5	0	5	-1	-1	-1	0	0	0	-1	-1
NM_001146185	PEG3	5	0	5	-1	0	-1	-1	-1	0	0	-1
NM_006211	PENK	5	0	5	0	-1	-1	-1	0	-1	-1	0
NM_001100877	PHYHD1	5	0	5	-1	0	-1	-1	-1	0	-1	0
NM_001100818	PID1	5	0	5	-1	-1	0	0	0	-1	-1	-1
NM_022062	PKNOX2	5	0	5	-1	0	0	0	-1	-1	-1	-1
NM_001161728	PLA2G2A	5	0	5	-1	-1	-1	-1	0	0	-1	0
NM_001242464	PPP1R1B	5	0	5	-1	-1	0	-1	-1	0	-1	0
NM_201348	PRELP	5	0	5	-1	-1	-1	0	0	0	-1	-1
NM_001164716	PYGM	5	0	5	-1	-1	-1	-1	0	0	0	-1
NM_020724	RNF150	5	0	5	-1	-1	-1	-1	-1	0	0	0
NM_001242909	RSPO1	5	0	5	0	-1	0	0	-1	-1	-1	-1
NM_004588	SCN2B	5	0	5	0	-1	-1	0	0	-1	-1	-1
NM_020163	SEMA3G	5	0	5	-1	-1	0	0	-1	-1	-1	0
NM_153616	SEMA6D	5	0	5	0	-1	-1	0	-1	-1	0	-1
NM_000023	SGCA	5	0	5	-1	0	-1	0	0	-1	-1	-1
NM_003984	SLC13A2	5	0	5	0	-1	-1	-1	-1	-1	0	0
NM_153357	SLC16A11	5	0	5	0	-1	0	0	-1	-1	-1	-1
NM_001042	SLC2A4	5	0	5	-1	-1	-1	-1	0	0	0	-1
NM_003102	SOD3	5	0	5	-1	-1	0	0	-1	0	-1	-1
NM_015464	SOSTDC1	5	0	5	-1	-1	0	0	-1	-1	-1	0
NM_003149	STAC	5	0	5	0	-1	-1	0	0	-1	-1	-1
NM_001205316	STEAP4	5	0	5	-1	-1	0	-1	0	0	-1	-1
NM_003206	TCF21	5	0	5	-1	0	-1	0	-1	-1	-1	0
NM_022479	WBSCR17	5	0	5	-1	0	-1	0	-1	0	-1	-1
NM_015657	ABCA12	4	4	0	0	1	0	0	1	1	1	0
NM_001288973	ADAM12	4	4	0	0	0	1	1	0	1	1	0
NM_080722	ADAMTS14	4	4	0	0	1	0	1	0	1	1	0
NM_144590	ANKRD22	4	4	0	0	1	0	0	0	1	1	1
NM_001136215	ARTN	4	4	0	0	1	0	1	0	0	1	1
NM_030765	B3GNT4	4	4	0	1	0	0	0	1	1	1	0
NM_005189	CBX2	4	4	0	1	0	1	0	0	1	1	0
NM_001238	CCNE1	4	4	0	1	0	0	0	0	1	1	1
NM_201567	CDC25A	4	4	0	1	0	0	0	0	1	1	1
NM_001002876	CENPM	4	4	0	1	1	0	0	0	0	1	1
NM_001274	CHEK1	4	4	0	1	0	0	0	0	1	1	1
NM_153221	CILP2	4	4	0	0	1	0	1	0	1	1	0
NM_000393	COL5A2	4	4	0	0	1	0	1	0	1	1	0
NM_000094	COL7A1	4	4	0	0	0	1	1	0	1	1	0
NM_001184699	CPXM1	4	4	0	0	0	1	1	0	1	1	0
NM_001899	CST4	4	4	0	0	1	1	0	0	0	1	1
NM_013989	DIO2	4	4	0	0	0	1	0	0	1	1	1
NM_005221	DLX5	4	4	0	0	0	0	1	1	0	1	1
NM_001207056	DNMT3B	4	4	0	1	0	0	1	0	0	1	1
NM_001123168	FAM72A	4	4	0	1	1	0	0	0	1	1	0
NM_030919	FAM83D	4	4	0	0	1	0	0	0	1	1	1
NM_004460	FAP	4	4	0	0	0	1	1	1	1	0	0
NM_001999	FBN2	4	4	0	1	1	0	1	0	0	1	0
NM_032532	FNDC1	4	4	0	0	1	0	1	0	1	1	0
NM_016095	GINS2	4	4	0	1	0	0	0	0	1	1	1
NM_000836	GRIN2D	4	4	0	1	0	1	1	0	0	0	1
NM_003483	HMGA2	4	4	0	1	0	0	1	0	1	1	0
NM_017409	HOXC10	4	4	0	0	1	0	1	0	1	1	0
NM_006547	IGF2BP3	4	4	0	1	0	0	1	0	1	1	0
NM_001135113	IGFL2	4	4	0	1	0	0	1	0	1	1	0
NM_002192	INHBA	4	4	0	1	1	1	1	0	0	0	0
NM_001198557	LMNB1	4	4	0	1	1	0	0	0	0	1	1
NM_018248	NEIL3	4	4	0	1	1	0	0	0	1	1	0
NM_001190819	ORC1	4	4	0	1	0	0	0	0	1	1	1
NM_014562	OTX1	4	4	0	1	0	1	0	0	1	1	0
NM_001288748	P4HA3	4	4	0	0	1	0	1	1	1	0	0
NM_001284513	PAQR4	4	4	0	1	1	1	0	0	0	0	1
NM_199420	POLQ	4	4	0	1	1	0	0	0	0	1	1
NM_005063	SCD	4	4	0	1	0	1	0	1	0	0	1
NM_001012410	SGOL1	4	4	0	1	1	0	0	0	1	1	0
NM_005982	SIX1	4	4	0	1	0	0	0	0	1	1	1
NM_003486	SLC7A5	4	4	0	0	0	1	0	0	1	1	1
NM_182513	SPC24	4	4	0	1	1	0	0	0	1	1	0
NM_020675	SPC25	4	4	0	1	0	0	0	1	1	1	0
NM_003714	STC2	4	4	0	0	0	1	1	1	0	0	1
NM_001282939	STIL	4	4	0	1	0	0	0	0	1	1	1
NM_003247	THBS2	4	4	0	0	0	1	1	0	1	1	0
NM_178031	TMEM132A	4	4	0	1	0	1	0	0	0	1	1
NM_005431	XRCC2	4	4	0	1	0	1	0	0	1	1	0
NM_000483	APOC2	4	3	1	0	1	1	0	1	0	-1	0
NM_001793	CDH3	4	3	1	0	0	1	0	-1	1	1	0
NM_024877	CNTD2	4	3	1	0	1	1	0	-1	1	0	0
NM_001201575	CTSV	4	3	1	0	0	0	1	-1	0	1	1
NM_001958	EEF1A2	4	3	1	0	1	-1	0	0	1	1	0
NM_017957	EPN3	4	3	1	0	1	0	0	-1	1	1	0
NM_001190467	FLJ22184	4	3	1	1	0	1	0	-1	0	0	1
NM_001191322	GREM1	4	3	1	0	0	0	1	-1	1	1	0
NM_152312	GYLTL1B	4	3	1	0	0	1	0	-1	0	1	1
NM_024017	HOXB9	4	3	1	0	0	0	1	-1	1	0	1
NM_032727	INA	4	3	1	0	0	-1	0	0	1	1	1
NM_000422	KRT17	4	3	1	0	-1	1	1	0	0	1	0
NM_005554	KRT6A	4	3	1	0	-1	1	0	0	1	1	0
NM_005555	KRT6B	4	3	1	0	-1	1	0	0	1	1	0
NM_173086	KRT6C	4	3	1	0	-1	1	0	0	1	1	0
NM_002381	MATN3	4	3	1	1	1	0	1	0	0	-1	0
NM_021154	PSAT1	4	3	1	0	0	1	0	-1	1	1	0
NM_002639	SERPINB5	4	3	1	0	-1	1	0	0	1	1	0
NM_022369	STRA6	4	3	1	0	0	1	0	-1	1	1	0
NM_001062	TCN1	4	3	1	0	-1	1	0	0	1	1	0
NM_001042425	TFAP2A	4	3	1	0	0	0	0	-1	1	1	1
NM_001080538	AKR1B15	4	2	2	0	-1	-1	0	0	1	1	0
NM_006688	C1QL1	4	2	2	-1	0	-1	1	1	0	0	0
NM_002994	CXCL5	4	2	2	0	-1	1	0	1	0	-1	0
NM_206918	DEGS2	4	2	2	0	1	0	-1	-1	0	0	1
NM_181872	DMRT2	4	2	2	1	-1	0	0	-1	0	1	0
NM_001256255	EMR1	4	2	2	0	0	0	1	1	-1	-1	0
NM_172110	EYA2	4	2	2	0	0	-1	-1	0	0	1	1
NM_001007225	IGF2BP2	4	2	2	0	-1	0	1	-1	0	1	0
NM_002237	KCNG1	4	2	2	1	0	-1	0	0	0	1	-1
NM_001001414	NCCRP1	4	2	2	0	0	0	-1	-1	1	1	0
NM_001197098	PRSS3	4	2	2	0	0	0	-1	-1	1	1	0
NM_016321	RHCG	4	2	2	0	0	1	-1	-1	0	1	0
NM_001252294	SPDEF	4	2	2	0	0	-1	0	0	1	-1	1
NM_012101	TRIM29	4	2	2	0	-1	1	0	-1	0	1	0
NM_004181	UCHL1	4	2	2	0	0	-1	0	-1	1	1	0
NM_001198552	WT1	4	2	2	0	1	1	0	-1	0	0	-1
NM_001651	AQP5	4	1	3	0	-1	0	-1	0	0	-1	1
NM_001085437	C2orf54	4	1	3	0	1	0	-1	-1	0	-1	0
NM_001233	CAV2	4	1	3	0	-1	0	0	1	-1	0	-1
NM_012128	CLCA4	4	1	3	0	-1	-1	-1	0	0	1	0
NM_006984	CLDN10	4	1	3	0	0	0	-1	-1	1	0	-1
NM_030820	COL21A1	4	1	3	-1	0	-1	0	1	0	-1	0
NM_001178147	CSF3	4	1	3	-1	0	1	0	0	-1	-1	0
NM_080760	DACH1	4	1	3	0	0	1	0	-1	-1	-1	0
NM_145173	DIRAS1	4	1	3	-1	0	0	0	-1	1	0	-1
NM_022355	DPEP2	4	1	3	0	0	-1	0	1	-1	-1	0
NM_000804	FOLR3	4	1	3	0	0	0	1	-1	-1	-1	0
NM_139277	KLK7	4	1	3	0	-1	1	0	-1	-1	0	0
NM_005556	KRT7	4	1	3	0	0	1	-1	-1	0	-1	0
NM_004210	NEURL1	4	1	3	-1	1	-1	0	0	0	0	-1
NM_015886	PI15	4	1	3	0	-1	-1	0	0	0	1	-1
NM_005855	RAMP1	4	1	3	-1	1	0	0	-1	0	0	-1
NM_020796	SEMA6A	4	1	3	0	0	-1	0	1	-1	-1	0
NM_173653	SLC9A9	4	1	3	-1	0	-1	0	1	0	0	-1
NM_001168325	TESC	4	1	3	0	-1	1	-1	0	0	-1	0
NM_024164	TPSB2	4	1	3	-1	0	-1	0	1	0	-1	0
NM_006103	WFDC2	4	1	3	0	0	-1	-1	-1	0	0	1
NM_080284	ABCA6	4	0	4	-1	-1	-1	0	0	0	-1	0
NM_000927	ABCB1	4	0	4	-1	-1	0	0	0	0	-1	-1
NM_001257386	ABCG2	4	0	4	0	0	-1	0	0	-1	-1	-1
NM_001608	ACADL	4	0	4	0	-1	0	-1	0	-1	-1	0
NM_003500	ACOX2	4	0	4	-1	0	0	-1	0	0	-1	-1
NM_024560	ACSS3	4	0	4	0	0	0	-1	0	-1	-1	-1
NM_006988	ADAMTS1	4	0	4	-1	-1	0	0	0	-1	0	-1
NM_001199642	ADCY5	4	0	4	-1	-1	-1	0	0	0	0	-1
NM_144650	ADHFE1	4	0	4	-1	-1	-1	0	0	0	-1	0
NM_004797	ADIPOQ	4	0	4	-1	-1	-1	-1	0	0	0	0
NM_000024	ADRB2	4	0	4	0	-1	-1	0	0	-1	-1	0
NM_032744	ADTRP	4	0	4	0	0	-1	0	-1	-1	-1	0
NM_001025108	AFF3	4	0	4	-1	0	-1	0	0	-1	-1	0
NM_173505	ANKRD29	4	0	4	-1	-1	0	0	0	-1	-1	0
NM_001257325	APBB1	4	0	4	-1	0	-1	0	0	0	-1	-1
NM_001647	APOD	4	0	4	-1	-1	0	-1	-1	0	0	0
NM_001185062	AQP1	4	0	4	-1	-1	0	0	0	-1	-1	0
NM_015193	ARC	4	0	4	-1	-1	0	0	0	-1	-1	0
NM_001258417	ARHGAP20	4	0	4	-1	-1	0	0	0	0	-1	-1
NM_032279	ATP13A4	4	0	4	0	0	-1	-1	0	-1	-1	0
NM_001678	ATP1B2	4	0	4	-1	0	-1	0	0	0	-1	-1
NM_001178005	BHMT2	4	0	4	-1	-1	-1	0	0	0	-1	0
NM_033254	BOC	4	0	4	-1	-1	0	-1	0	0	0	-1
NM_152547	BTNL9	4	0	4	-1	-1	0	0	0	-1	-1	0
NM_001252195	C9orf24	4	0	4	0	0	-1	0	-1	-1	-1	0
NM_001127173	CADM3	4	0	4	-1	-1	-1	0	0	0	-1	0
NM_001253388	CHL1	4	0	4	0	-1	-1	0	-1	0	0	-1
NM_001199552	CIDEC	4	0	4	-1	-1	-1	-1	0	0	0	0
NM_001099735	CKMT2	4	0	4	-1	-1	0	-1	-1	0	0	0
NM_199328	CLDN8	4	0	4	0	-1	-1	-1	-1	0	0	0
NM_024769	CLMP	4	0	4	0	-1	-1	0	-1	0	0	-1
NM_001299	CNN1	4	0	4	-1	-1	-1	0	0	0	0	-1
NM_033181	CNR1	4	0	4	0	-1	-1	0	0	-1	-1	0
NM_000092	COL4A4	4	0	4	-1	0	0	0	-1	-1	-1	0
NM_015692	CPAMD8	4	0	4	0	-1	0	0	-1	-1	-1	0
NM_001911	CTSG	4	0	4	-1	-1	-1	0	0	0	-1	0
NM_001286791	CWH43	4	0	4	0	0	-1	-1	-1	-1	0	0
NM_002089	CXCL2	4	0	4	-1	-1	0	0	0	-1	-1	0
NM_001256909	CYBRD1	4	0	4	-1	0	-1	0	0	0	-1	-1
NM_000779	CYP4B1	4	0	4	0	0	-1	-1	0	-1	-1	0
NM_052954	CYYR1	4	0	4	0	-1	0	0	0	-1	-1	-1
NM_133504	DCN	4	0	4	-1	0	-1	0	-1	0	0	-1
NM_005218	DEFB1	4	0	4	0	-1	-1	-1	-1	0	0	0
NM_015689	DENND2A	4	0	4	-1	-1	0	0	0	0	-1	-1
NM_001290252	DPP6	4	0	4	0	0	-1	0	-1	-1	0	-1
NM_004417	DUSP1	4	0	4	-1	-1	0	0	0	0	-1	-1
NM_003991	EDNRB	4	0	4	-1	-1	0	0	0	-1	-1	0
NM_001039349	EFEMP1	4	0	4	-1	-1	0	0	0	0	-1	-1
NM_001159694	EMCN	4	0	4	-1	0	0	0	0	-1	-1	-1
NM_001442	FABP4	4	0	4	0	-1	-1	0	0	-1	-1	0
NM_024869	FAM110D	4	0	4	-1	-1	0	0	0	-1	-1	0
NM_001006655	FAM149A	4	0	4	-1	-1	0	-1	0	0	-1	0
NM_001085480	FAM162B	4	0	4	-1	-1	0	0	0	-1	-1	0
NM_032385	FAXDC2	4	0	4	-1	-1	0	0	0	0	-1	-1
NM_006329	FBLN5	4	0	4	-1	0	0	0	-1	-1	-1	0
NM_002001	FCER1A	4	0	4	-1	0	-1	-1	0	0	-1	0
NM_005252	FOS	4	0	4	-1	-1	0	0	0	0	-1	-1
NM_001172766	FOXP2	4	0	4	-1	-1	-1	0	0	0	0	-1
NM_001204268	FXYD6_FXYD2	4	0	4	-1	0	-1	0	0	0	-1	-1
NM_005257	GATA6	4	0	4	-1	0	0	0	0	-1	-1	-1
NM_001165039	GFRA2	4	0	4	-1	-1	-1	0	0	0	-1	0
NM_017655	GIPC2	4	0	4	0	-1	0	-1	0	-1	-1	0
NM_181789	GLDN	4	0	4	0	-1	-1	0	0	-1	-1	0
NM_004297	GNA14	4	0	4	-1	0	0	-1	0	0	-1	-1
NM_004126	GNG11	4	0	4	-1	-1	0	0	0	-1	-1	0
NM_170699	GPBAR1	4	0	4	-1	-1	0	0	0	-1	-1	0
NM_001257199	GPD1	4	0	4	0	-1	0	-1	0	-1	-1	0
NM_022469	GREM2	4	0	4	-1	-1	-1	-1	0	0	0	0
NM_001258029	GSN	4	0	4	-1	-1	-1	0	0	0	0	-1
NM_016815	GYPC	4	0	4	-1	0	-1	0	0	0	-1	-1
NM_000558	HBA1	4	0	4	0	-1	-1	0	0	-1	-1	0
NM_000517	HBA2	4	0	4	0	-1	-1	0	0	-1	-1	0
NM_000518	HBB	4	0	4	0	-1	-1	0	0	-1	-1	0
NM_001256301	HPGD	4	0	4	0	0	-1	-1	-1	0	-1	0
NM_001166245	HPSE2	4	0	4	-1	-1	-1	0	0	-1	0	0
NM_153285	HYAL1	4	0	4	-1	-1	0	0	0	-1	-1	0
NM_002178	IGFBP6	4	0	4	-1	-1	-1	0	0	0	0	-1
NM_024337	IRX1	4	0	4	0	-1	0	0	-1	-1	-1	0
NM_003638	ITGA8	4	0	4	-1	0	0	0	0	-1	-1	-1
NM_017625	ITLN1	4	0	4	0	0	-1	0	-1	-1	-1	0
NM_001270408	JAM2	4	0	4	-1	0	-1	0	0	-1	-1	0
NM_020433	JPH2	4	0	4	-1	-1	-1	0	0	0	0	-1
NM_015493	KANK2	4	0	4	-1	0	-1	0	0	0	-1	-1
NM_002234	KCNA5	4	0	4	-1	0	-1	0	0	-1	-1	0
NM_004975	KCNB1	4	0	4	-1	-1	-1	0	0	0	0	-1
NM_001270405	KCNE1	4	0	4	0	-1	0	0	-1	-1	-1	0
NM_004137	KCNMB1	4	0	4	-1	-1	-1	0	0	0	0	-1
NM_004795	KL	4	0	4	0	-1	-1	0	0	-1	-1	0
NM_014079	KLF15	4	0	4	0	-1	0	-1	0	-1	-1	0
NM_001206	KLF9	4	0	4	-1	0	-1	0	0	0	-1	-1
NM_001290	LDB2	4	0	4	-1	-1	0	0	0	-1	-1	0
NM_198461	LONRF2	4	0	4	-1	0	-1	0	-1	0	0	-1
NM_024512	LRRC2	4	0	4	-1	0	0	-1	-1	-1	0	0
NM_022439	MAL	4	0	4	0	0	-1	-1	-1	0	-1	0
NM_033063	MAP6	4	0	4	0	0	-1	0	-1	0	-1	-1
NM_005924	MEOX2	4	0	4	0	-1	-1	0	0	0	-1	-1
NM_014033	METTL7A	4	0	4	0	0	-1	-1	0	-1	-1	0
NM_001003794	MGLL	4	0	4	-1	-1	0	-1	0	0	-1	0
NM_024302	MMP28	4	0	4	0	0	-1	0	0	-1	-1	-1
NM_001286828	MORN5	4	0	4	-1	0	-1	0	0	-1	-1	0
NM_000530	MPZ	4	0	4	-1	-1	-1	-1	0	0	0	0
NM_001256916	MS4A2	4	0	4	-1	0	-1	0	0	-1	-1	0
NM_005946	MT1A	4	0	4	-1	0	-1	-1	0	0	-1	0
NM_145650	MUC15	4	0	4	0	-1	0	-1	-1	0	-1	0
NM_053031	MYLK	4	0	4	-1	-1	-1	0	0	0	0	-1
NM_153604	MYOCD	4	0	4	-1	0	-1	0	0	0	-1	-1
NM_000615	NCAM1	4	0	4	-1	-1	-1	0	0	0	0	-1
NM_024574	NDNF	4	0	4	-1	0	0	0	-1	-1	-1	0
NM_173808	NEGR1	4	0	4	-1	0	-1	0	0	0	-1	-1
NM_001172309	NEXN	4	0	4	-1	0	-1	0	0	0	-1	-1
NM_002515	NOVA1	4	0	4	-1	-1	-1	0	0	0	0	-1
NM_001080378	PACRG	4	0	4	0	-1	0	0	-1	-1	-1	0
NM_020403	PCDH9	4	0	4	0	-1	0	0	-1	-1	-1	0
NM_001201529	PCSK2	4	0	4	-1	0	-1	0	0	-1	-1	0
NM_001191058	PDE1C	4	0	4	-1	-1	0	0	0	-1	-1	0
NM_033437	PDE5A	4	0	4	-1	0	-1	0	0	0	-1	-1
NM_014759	PHYHIP	4	0	4	-1	-1	0	-1	0	0	0	-1
NM_006226	PLCL1	4	0	4	-1	0	0	0	-1	0	-1	-1
NM_001145311	PLIN1	4	0	4	-1	-1	-1	-1	0	0	0	0
NM_002667	PLN	4	0	4	-1	0	-1	-1	0	0	0	-1
NM_005037	PPARG	4	0	4	0	-1	0	-1	0	-1	-1	0
NM_001197131	PPP1R12B	4	0	4	-1	-1	-1	0	0	0	0	-1
NM_033256	PPP1R14A	4	0	4	-1	-1	-1	0	0	0	-1	0
NM_002736	PRKAR2B	4	0	4	-1	0	-1	0	-1	0	0	-1
NM_001145852	PROM1	4	0	4	-1	-1	0	-1	-1	0	0	0
NM_000954	PTGDS	4	0	4	-1	-1	0	0	-1	0	-1	0
NM_000961	PTGIS	4	0	4	-1	0	-1	0	0	0	-1	-1
NM_002852	PTX3	4	0	4	-1	-1	-1	0	0	0	-1	0
NM_145000	RANBP3L	4	0	4	-1	0	0	0	-1	-1	-1	0
NM_016563	RASL12	4	0	4	-1	0	-1	0	0	0	-1	-1
NM_001003792	RBMS3	4	0	4	-1	-1	0	0	0	0	-1	-1
NM_006744	RBP4	4	0	4	0	-1	0	0	-1	-1	-1	0
NM_173054	RELN	4	0	4	0	-1	-1	0	-1	0	0	-1
NM_001190726	RERG	4	0	4	-1	0	-1	-1	0	0	0	-1
NM_001256571	RXRG	4	0	4	0	-1	-1	0	0	-1	-1	0
NM_052863	SCGB3A1	4	0	4	0	-1	0	-1	0	-1	-1	0
NM_173050	SCUBE1	4	0	4	-1	0	0	0	-1	-1	-1	0
NM_003005	SELP	4	0	4	-1	-1	0	0	0	-1	-1	0
NM_001290061	SEMA3B	4	0	4	-1	0	0	0	-1	-1	-1	0
NM_000231	SGCG	4	0	4	-1	-1	0	0	0	-1	-1	0
NM_003026	SH3GL2	4	0	4	-1	0	0	0	-1	-1	-1	0
NM_001080505	SHISA3	4	0	4	-1	0	-1	0	-1	0	-1	0
NM_021977	SLC22A3	4	0	4	-1	-1	0	0	0	0	-1	-1
NM_003759	SLC4A4	4	0	4	-1	-1	-1	0	0	0	-1	0
NM_001145672	SORBS2	4	0	4	-1	0	-1	-1	0	0	-1	0
NM_006941	SOX10	4	0	4	-1	-1	-1	-1	0	0	0	0
NM_004684	SPARCL1	4	0	4	-1	0	-1	0	0	0	-1	-1
NM_020759	STARD9	4	0	4	-1	-1	0	0	0	-1	-1	0
NM_153366	SVEP1	4	0	4	-1	-1	0	0	-1	0	-1	0
NM_015286	SYNM	4	0	4	-1	-1	-1	0	0	0	0	-1
NM_001004313	TMEM220	4	0	4	-1	-1	-1	0	0	0	-1	0
NM_203411	TMEM88	4	0	4	-1	-1	0	0	0	-1	-1	0
NM_003280	TNNC1	4	0	4	0	0	0	-1	-1	-1	-1	0
NM_001001432	TNNT2	4	0	4	-1	0	0	0	-1	-1	-1	0
NM_007030	TPPP	4	0	4	-1	-1	0	0	0	-1	-1	0
NM_004616	TSPAN8	4	0	4	0	-1	0	-1	-1	0	-1	0
NM_001005367	TTYH1	4	0	4	0	-1	-1	-1	0	0	0	-1
NM_007191	WIF1	4	0	4	0	-1	0	-1	0	-1	-1	0
NM_001253845	ADM2	3	3	0	0	0	0	0	0	1	1	1
NM_004833	AIM2	3	3	0	0	0	0	1	1	1	0	0
NM_001015050	ALG1L	3	3	0	0	0	0	1	0	1	1	0
NM_000479	AMH	3	3	0	1	0	1	0	0	0	0	1
NM_001286480	ARHGAP11A	3	3	0	1	0	0	0	0	0	1	1
NM_181718	ASPHD1	3	3	0	0	0	1	0	1	1	0	0
NM_001276468	B4GALNT1	3	3	0	0	0	0	1	1	0	1	0
NM_178537	B4GALNT4	3	3	0	1	0	0	0	0	1	1	0
NM_021570	BARX1	3	3	0	1	0	0	0	0	1	1	0
NM_181809	BMP8A	3	3	0	0	0	0	1	0	1	1	0
NM_032043	BRIP1	3	3	0	1	0	0	0	0	1	1	0
NM_206967	C16orf74	3	3	0	0	0	0	1	1	0	1	0
NM_001171251	C17orf53	3	3	0	1	0	0	0	0	1	1	0
NM_207322	C2CD4A	3	3	0	0	0	1	0	0	1	1	0
NM_145810	CDCA7	3	3	0	0	0	0	0	1	1	1	0
NM_001407	CELSR3	3	3	0	1	0	1	0	0	1	0	0
NM_001267038	CENPK	3	3	0	1	0	0	0	1	0	1	0
NM_014141	CNTNAP2	3	3	0	0	1	0	1	0	0	1	0
NM_000090	COL3A1	3	3	0	0	0	0	1	0	1	1	0
NM_000093	COL5A1	3	3	0	0	1	0	1	0	1	0	0
NM_000095	COMP	3	3	0	0	1	1	0	0	1	0	0
NM_004887	CXCL14	3	3	0	0	0	0	0	0	1	1	1
NM_005222	DLX6	3	3	0	0	0	0	1	0	0	1	1
NM_005225	E2F1	3	3	0	0	1	0	0	1	0	0	1
NM_001256372	E2F8	3	3	0	0	1	0	0	0	1	1	0
NM_032331	ECE2	3	3	0	1	0	0	0	0	0	1	1
NM_018098	ECT2	3	3	0	1	0	0	0	0	0	1	1
NM_004952	EFNA3	3	3	0	0	0	0	0	1	1	1	0
NM_022073	EGLN3	3	3	0	0	0	0	0	1	1	1	0
NM_001426	EN1	3	3	0	1	0	0	1	0	0	1	0
NM_000505	F12	3	3	0	0	1	0	0	0	1	1	0
NM_207418	FAM72D	3	3	0	1	1	0	0	0	0	1	0
NM_023067	FOXL2	3	3	0	1	0	0	1	0	0	1	0
NM_004004	GJB2	3	3	0	0	1	0	0	0	1	1	0
NM_001098721	GNG4	3	3	0	0	0	1	0	0	1	1	0
NM_001142466	GPT2	3	3	0	0	0	0	0	0	1	1	1
NM_001289072	HELLS	3	3	0	0	0	0	0	0	1	1	1
NM_018951	HOXA10	3	3	0	0	0	0	1	0	1	1	0
NM_014212	HOXC11	3	3	0	0	1	0	1	0	0	1	0
NM_017410	HOXC13	3	3	0	0	1	0	1	0	0	1	0
NM_004503	HOXC6	3	3	0	1	0	0	1	0	0	1	0
NM_006897	HOXC9	3	3	0	1	0	0	1	0	0	1	0
NM_000641	IL11	3	3	0	0	0	1	1	0	0	1	0
NM_005101	ISG15	3	3	0	0	1	0	1	0	0	0	1
NM_001004439	ITGA11	3	3	0	0	0	0	1	0	1	1	0
NM_031217	KIF18A	3	3	0	1	1	0	0	0	0	1	0
NM_182507	KRT80	3	3	0	0	0	1	0	0	1	1	0
NM_001199052	LEMD1	3	3	0	0	0	1	0	0	1	1	0
NM_001277339	LOC100996634	3	3	0	1	0	1	0	0	0	1	0
NM_001160355	LY6K	3	3	0	0	0	0	1	0	1	1	0
NM_001135247	MFAP2	3	3	0	0	1	1	1	0	0	0	0
NM_002426	MMP12	3	3	0	0	0	0	1	0	1	1	0
NM_001253861	MND1	3	3	0	0	1	0	0	0	1	1	0
NM_138419	MTFR2	3	3	0	1	1	0	0	0	0	1	0
NM_022346	NCAPG	3	3	0	1	0	0	0	0	0	1	1
NM_001201477	NETO2	3	3	0	0	0	0	1	1	0	0	1
NM_007280	OIP5	3	3	0	1	1	0	0	0	0	1	0
NM_001124756	PABPC1L	3	3	0	1	0	1	0	0	0	0	1
NM_001145940	PAFAH1B3	3	3	0	0	1	0	0	0	0	1	1
NM_017915	PARPBP	3	3	0	1	0	0	0	0	0	1	1
NM_004567	PFKFB4	3	3	0	1	0	0	0	1	0	0	1
NM_025049	PIF1	3	3	0	1	0	0	0	0	0	1	1
NM_001204399	PITX2	3	3	0	0	0	1	0	0	1	1	0
NM_002658	PLAU	3	3	0	0	0	0	1	0	1	1	0
NM_032129	PLEKHN1	3	3	0	0	0	1	0	0	1	1	0
NM_001190799	PLK4	3	3	0	1	0	0	0	0	0	1	1
NM_015720	PODXL2	3	3	0	0	0	0	0	0	1	1	1
NM_001197330	POLE2	3	3	0	1	0	0	0	0	1	1	0
NM_177526	PPAP2C	3	3	0	0	0	0	0	0	1	1	1
NM_015053	PPFIA4	3	3	0	0	0	0	0	1	0	1	1
NM_181876	PPP2R2C	3	3	0	0	1	0	0	0	1	1	0
NM_018304	PRR11	3	3	0	1	0	0	0	0	1	1	0
NM_198966	PTHLH	3	3	0	0	0	0	1	1	0	1	0
NM_001161440	PTPRH	3	3	0	0	0	0	1	0	1	1	0
NM_152308	RMI2	3	3	0	0	1	0	0	0	1	1	0
NM_145051	RNF183	3	3	0	0	0	1	0	0	1	0	1
NM_005980	S100P	3	3	0	0	1	1	0	0	1	0	0
NM_001024401	SBK1	3	3	0	1	1	0	0	0	0	0	1
NM_003020	SCG5	3	3	0	0	0	0	1	0	1	1	0
NM_017420	SIX4	3	3	0	1	0	0	0	0	1	1	0
NM_006516	SLC2A1	3	3	0	0	0	0	1	0	1	1	0
NM_003039	SLC2A5	3	3	0	0	0	0	0	1	1	1	0
NM_014331	SLC7A11	3	3	0	0	0	1	0	0	1	1	0
NM_019844	SLCO1B3	3	3	0	0	0	1	1	0	0	1	0
NM_001195243	SMKR1	3	3	0	1	0	1	0	0	1	0	0
NM_003116	SPAG4	3	3	0	0	0	0	0	1	1	0	1
NM_001128206	SULF1	3	3	0	0	0	0	1	0	1	1	0
NM_000358	TGFBI	3	3	0	0	0	1	1	1	0	0	0
NM_148902	TNFRSF18	3	3	0	0	0	0	0	0	1	1	1
NM_001126133	TNNT1	3	3	0	0	1	0	0	0	1	1	0
NM_025250	TTYH3	3	3	0	0	0	1	1	0	0	0	1
NM_006086	TUBB3	3	3	0	0	1	0	0	0	1	1	0
NM_001071	TYMS	3	3	0	0	0	0	0	1	0	1	1
NM_014501	UBE2S	3	3	0	0	1	0	0	0	0	1	1
NM_025217	ULBP2	3	3	0	1	0	1	0	0	0	1	0
NM_001277176	WDR72	3	3	0	1	0	1	0	0	0	1	0
NM_003391	WNT2	3	3	0	1	0	1	1	0	0	0	0
NM_138420	AHNAK2	3	2	1	0	0	0	0	1	0	1	-1
NM_020299	AKR1B10	3	2	1	0	0	-1	0	0	1	1	0
NM_001645	APOC1	3	2	1	1	0	0	0	1	0	-1	0
NM_020980	AQP9	3	2	1	0	0	0	1	1	0	-1	0
NM_001719	BMP7	3	2	1	0	0	1	0	-1	0	1	0
NM_207373	C10orf99	3	2	1	0	0	-1	0	1	0	1	0
NM_197955	C15orf48	3	2	1	0	1	-1	0	0	1	0	0
NM_004929	CALB1	3	2	1	0	0	0	1	-1	0	1	0
NM_001130852	CBLC	3	2	1	0	0	0	0	-1	1	1	0
NM_021147	CCNO	3	2	1	0	0	1	0	-1	0	1	0
NM_004363	CEACAM5	3	2	1	0	1	0	-1	0	1	0	0
NM_001807	CEL	3	2	1	0	0	1	0	-1	0	1	0
NM_021101	CLDN1	3	2	1	0	0	1	0	0	0	1	-1
NM_032488	CNFN	3	2	1	0	0	0	-1	0	1	1	0
NM_004086	COCH	3	2	1	0	0	0	0	-1	1	1	0
NM_000494	COL17A1	3	2	1	0	-1	0	0	0	1	1	0
NM_001199723	CRABP2	3	2	1	0	0	0	0	-1	1	1	0
NM_001128915	CYP24A1	3	2	1	0	0	0	0	-1	1	1	0
NM_000785	CYP27B1	3	2	1	0	0	0	1	-1	1	0	0
NM_001128141	DPEP1	3	2	1	0	0	1	0	-1	1	0	0
NM_001956	EDN2	3	2	1	0	1	-1	0	0	1	0	0
NM_001242690	ERVMER34_1	3	2	1	0	0	0	1	-1	0	1	0
NM_001135032	EVA1A	3	2	1	1	0	1	0	0	0	-1	0
NM_001010872	FAM83B	3	2	1	0	0	0	0	-1	1	1	0
NM_138435	FAM83F	3	2	1	0	0	0	0	-1	1	1	0
NM_001079871	HAP1	3	2	1	0	-1	0	1	0	0	1	0
NM_001884	HAPLN1	3	2	1	0	0	-1	0	1	0	0	1
NM_012206	HAVCR1	3	2	1	0	0	-1	0	1	1	0	0
NM_024016	HOXB8	3	2	1	0	0	1	0	-1	0	0	1
NM_021192	HOXD11	3	2	1	0	0	0	1	-1	0	1	0
NM_001256296	IGLL5	3	2	1	0	0	-1	0	1	1	0	0
NM_004321	KIF1A	3	2	1	0	0	-1	0	0	0	1	1
NM_001281431	KLK8	3	2	1	0	-1	1	0	0	0	1	0
NM_000526	KRT14	3	2	1	0	-1	0	0	0	1	1	0
NM_001282433	KRT23	3	2	1	0	0	1	-1	0	0	1	0
NM_005558	LAD1	3	2	1	0	0	0	0	-1	0	1	1
NM_003695	LY6D	3	2	1	0	-1	0	0	0	1	1	0
NM_006158	NEFL	3	2	1	0	0	-1	1	0	0	1	0
NM_004561	OVOL1	3	2	1	0	0	0	0	-1	1	1	0
NM_001040429	PCDH17	3	2	1	0	0	0	1	1	0	-1	0
NM_174936	PCSK9	3	2	1	0	0	1	1	0	-1	0	0
NM_001005337	PKP1	3	2	1	0	-1	1	0	0	0	1	0
NM_001165978	PROM2	3	2	1	0	0	0	0	-1	1	1	0
NM_030916	PVRL4	3	2	1	0	0	0	0	-1	0	1	1
NM_017821	RHBDL2	3	2	1	0	0	-1	0	0	1	1	0
NM_005978	S100A2	3	2	1	0	0	1	0	-1	0	1	0
NM_003469	SCG2	3	2	1	0	1	-1	0	1	0	0	0
NM_005069	SIM2	3	2	1	1	0	1	0	-1	0	0	0
NM_153247	SLC29A4	3	2	1	0	-1	0	0	0	1	0	1
NM_001174089	SLC4A11	3	2	1	0	0	1	0	-1	0	1	0
NM_177973	SULT2B1	3	2	1	0	0	1	0	-1	0	0	1
NM_004200	SYT7	3	2	1	0	0	1	0	-1	1	0	0
NM_002353	TACSTD2	3	2	1	0	0	1	0	-1	0	0	1
NM_001122679	TENM2	3	2	1	0	-1	0	1	0	0	1	0
NM_001161342	TMEM171	3	2	1	0	0	-1	0	0	1	1	0
NM_014058	TMPRSS11E	3	2	1	0	0	0	-1	0	1	1	0
NM_018643	TREM1	3	2	1	0	0	1	1	0	0	-1	0
NM_003385	VSNL1	3	2	1	0	0	1	0	-1	0	1	0
NM_000379	XDH	3	2	1	0	0	-1	0	0	1	1	0
NM_014945	ABLIM3	3	1	2	0	0	0	0	1	0	-1	-1
NM_020546	ADCY2	3	1	2	0	0	-1	0	1	0	0	-1
NM_001353	AKR1C1	3	1	2	0	-1	-1	0	0	0	1	0
NM_001177520	ALPL	3	1	2	0	0	0	0	0	-1	-1	1
NM_001632	ALPP	3	1	2	1	0	0	0	0	-1	-1	0
NM_001286570	AMICA1	3	1	2	0	0	0	0	1	-1	-1	0
NM_001185	AZGP1	3	1	2	0	0	1	-1	0	0	-1	0
NM_138706	B3GNT6	3	1	2	0	0	-1	-1	0	1	0	0
NM_007021	C10orf10	3	1	2	0	-1	0	0	1	0	-1	0
NM_000064	C3	3	1	2	-1	0	0	0	1	0	-1	0
NM_005185	CALML3	3	1	2	0	-1	0	0	-1	0	1	0
NM_144575	CAPN13	3	1	2	0	0	-1	0	0	0	-1	1
NM_006615	CAPN9	3	1	2	0	1	0	0	0	-1	-1	0
NM_001123041	CCR2	3	1	2	0	0	-1	0	1	0	-1	0
NM_006678	CD300C	3	1	2	0	0	0	0	1	-1	-1	0
NM_001289087	CD300LF	3	1	2	0	0	0	0	1	-1	-1	0
NM_001803	CD52	3	1	2	0	0	0	0	1	-1	-1	0
NM_005894	CD5L	3	1	2	0	0	0	0	1	-1	-1	0
NM_002483	CEACAM6	3	1	2	0	1	0	-1	0	0	-1	0
NM_001819	CHGB	3	1	2	0	0	-1	0	-1	0	1	0
NM_001025197	CHI3L2	3	1	2	0	0	0	0	1	-1	-1	0
NM_001204177	CHODL	3	1	2	0	0	-1	0	-1	0	1	0
NM_001207010	CLEC12A	3	1	2	0	0	0	0	1	-1	-1	0
NM_001870	CPA3	3	1	2	-1	0	0	0	1	0	-1	0
NM_000760	CSF3R	3	1	2	0	0	0	0	1	-1	-1	0
NM_001337	CX3CR1	3	1	2	0	0	0	-1	1	0	-1	0
NM_002090	CXCL3	3	1	2	0	0	1	0	0	-1	-1	0
NM_000777	CYP3A5	3	1	2	0	0	0	-1	1	0	-1	0
NM_004734	DCLK1	3	1	2	-1	0	-1	0	1	0	0	0
NM_145244	DDIT4L	3	1	2	0	0	-1	-1	0	1	0	0
NM_014421	DKK2	3	1	2	1	0	0	0	0	-1	-1	0
NM_007046	EMILIN1	3	1	2	-1	0	0	1	0	0	0	-1
NM_001248	ENTPD3	3	1	2	0	0	-1	0	-1	0	0	1
NM_001446	FABP7	3	1	2	0	-1	0	-1	1	0	0	0
NM_206964	FAM3B	3	1	2	0	0	1	-1	-1	0	0	0
NM_005103	FEZ1	3	1	2	0	0	0	1	0	-1	0	-1
NM_004751	GCNT3	3	1	2	0	0	-1	-1	0	1	0	0
NM_001496	GFRA3	3	1	2	-1	0	-1	0	0	0	0	1
NM_003979	GPRC5A	3	1	2	0	1	0	0	-1	0	-1	0
NM_006018	HCAR3	3	1	2	0	-1	1	0	0	-1	0	0
NM_001282557	HHLA2	3	1	2	0	0	-1	0	1	0	-1	0
NM_002115	HK3	3	1	2	0	0	0	0	1	-1	-1	0
NM_004839	HOMER2	3	1	2	0	0	-1	0	-1	0	0	1
NM_001161772	HTR3A	3	1	2	0	0	-1	-1	0	1	0	0
NM_001271522	KCNMA1	3	1	2	0	0	-1	0	1	0	0	-1
NM_145888	KLK10	3	1	2	0	-1	1	0	0	-1	0	0
NM_002258	KLRB1	3	1	2	0	0	-1	0	1	0	-1	0
NM_002274	KRT13	3	1	2	0	0	0	-1	0	-1	1	0
NM_018176	LGI2	3	1	2	0	0	0	0	-1	1	0	-1
NM_001013653	LRRC26	3	1	2	0	0	-1	-1	0	0	0	1
NM_001161575	LRRC36	3	1	2	0	0	1	0	0	-1	-1	0
NM_000239	LYZ	3	1	2	0	0	0	-1	1	0	-1	0
NM_005368	MB	3	1	2	0	0	-1	-1	0	1	0	0
NM_001281473	MLPH	3	1	2	0	0	0	-1	0	0	-1	1
NM_152717	MS4A15	3	1	2	0	1	0	0	0	-1	-1	0
NM_206940	MS4A7	3	1	2	0	0	0	0	1	-1	-1	0
NM_002445	MSR1	3	1	2	0	0	0	0	1	-1	-1	0
NM_005950	MT1G	3	1	2	0	0	-1	0	-1	0	0	1
NM_001044391	MUC1	3	1	2	0	1	0	0	-1	0	-1	0
NM_001010909	MUC21	3	1	2	0	0	0	-1	0	1	-1	0
NM_033119	NKD1	3	1	2	0	0	1	0	0	-1	-1	0
NM_001199139	NLRC4	3	1	2	0	0	0	0	1	-1	-1	0
NM_001159995	NRG1	3	1	2	0	-1	0	1	0	-1	0	0
NM_133168	OSCAR	3	1	2	0	0	0	0	1	-1	-1	0
NM_006198	PCP4	3	1	2	-1	0	0	0	-1	1	0	0
NM_032152	PRAM1	3	1	2	0	0	0	0	1	-1	-1	0
NM_001206839	PTPRZ1	3	1	2	0	-1	-1	0	0	0	1	0
NM_014310	RASD2	3	1	2	0	0	-1	0	1	0	0	-1
NM_170774	RASSF2	3	1	2	0	0	0	0	1	0	-1	-1
NM_001166286	RGMA	3	1	2	0	-1	-1	0	0	0	1	0
NM_001254748	RGS5	3	1	2	-1	0	0	0	1	0	-1	0
NM_001278655	RP11_290F20.3	3	1	2	0	0	0	0	1	-1	-1	0
NM_145307	RTKN2	3	1	2	0	0	0	0	0	-1	-1	1
NM_000578	SLC11A1	3	1	2	0	0	0	1	0	-1	-1	0
NM_001178044	SLC44A4	3	1	2	0	1	0	0	-1	0	-1	0
NM_022405	SLC6A20	3	1	2	0	0	1	0	0	-1	-1	0
NM_003048	SLC9A2	3	1	2	0	0	-1	0	-1	0	1	0
NM_001011552	SLC9A4	3	1	2	0	0	0	-1	-1	0	1	0
NM_003081	SNAP25	3	1	2	0	0	-1	0	1	0	0	-1
NM_003123	SPN	3	1	2	0	0	0	0	1	-1	-1	0
NM_001040100	SPTSSB	3	1	2	0	0	0	-1	-1	0	1	0
NM_001164436	TMEM212	3	1	2	0	0	0	0	1	-1	-1	0
NM_000552	VWF	3	1	2	0	0	0	0	1	-1	-1	0
NM_004625	WNT7A	3	1	2	0	0	0	1	0	-1	-1	0
NM_001025357	AARD	3	0	3	-1	0	0	0	0	-1	-1	0
NM_001093	ACACB	3	0	3	-1	-1	0	0	0	0	-1	0
NM_006829	ADIRF	3	0	3	0	0	0	0	0	-1	-1	-1
NM_000684	ADRB1	3	0	3	0	-1	0	0	0	-1	-1	0
NM_176813	AGR3	3	0	3	0	0	-1	-1	0	0	-1	0
NM_001136562	AKAP2	3	0	3	0	0	0	0	0	-1	-1	-1
NM_001270365	ALDH1L1	3	0	3	0	-1	-1	-1	0	0	0	0
NM_001172626	AMPD1	3	0	3	0	-1	-1	-1	0	0	0	0
NM_001199859	ANGPT1	3	0	3	0	-1	0	0	0	-1	-1	0
NM_005139	ANXA3	3	0	3	0	0	0	0	-1	-1	-1	0
NM_001170	AQP7	3	0	3	0	-1	0	-1	0	0	-1	0
NM_001202429	ASB2	3	0	3	-1	0	-1	0	0	0	0	-1
NM_001030287	ATF3	3	0	3	-1	-1	0	0	0	0	0	-1
NM_003657	BCAS1	3	0	3	0	0	-1	-1	-1	0	0	0
NM_001201	BMP3	3	0	3	0	0	-1	-1	0	0	-1	0
NM_133468	BMPER	3	0	3	0	-1	0	0	0	-1	-1	0
NM_017637	BNC2	3	0	3	-1	0	-1	0	0	0	0	-1
NM_001145033	C11orf96	3	0	3	-1	0	0	0	0	0	-1	-1
NM_001039614	C15orf59	3	0	3	-1	0	0	0	-1	-1	0	0
NM_001142469	C16orf45	3	0	3	-1	0	-1	0	0	0	0	-1
NM_001004303	C1orf168	3	0	3	0	0	0	0	-1	-1	-1	0
NM_001003665	C1orf95	3	0	3	-1	0	-1	0	-1	0	0	0
NM_032321	C2orf88	3	0	3	0	-1	-1	-1	0	0	0	0
NM_000715	C4BPA	3	0	3	0	-1	0	0	0	-1	-1	0
NM_000065	C6	3	0	3	0	-1	0	0	0	-1	-1	0
NM_001010940	C9orf135	3	0	3	0	0	0	0	-1	-1	-1	0
NM_001287339	CAB39L	3	0	3	0	0	0	-1	0	0	-1	-1
NM_000722	CACNA2D1	3	0	3	-1	0	-1	0	0	0	0	-1
NM_006030	CACNA2D2	3	0	3	0	0	0	0	-1	-1	-1	0
NM_173089	CAPN3	3	0	3	0	0	0	-1	0	-1	-1	0
NM_178499	CCDC60	3	0	3	-1	0	0	0	0	-1	-1	0
NM_199512	CCDC80	3	0	3	-1	0	-1	0	0	0	0	-1
NM_001080433	CCDC85A	3	0	3	0	-1	0	0	0	-1	-1	0
NM_145898	CCL23	3	0	3	0	0	-1	0	0	-1	-1	0
NM_001278417	CD22	3	0	3	-1	0	0	0	0	0	-1	-1
NM_145273	CD300LG	3	0	3	0	-1	0	0	0	-1	-1	0
NM_006561	CELF2	3	0	3	-1	0	0	0	0	0	-1	-1
NM_000492	CFTR	3	0	3	0	0	0	-1	0	-1	-1	0
NM_000738	CHRM1	3	0	3	0	0	0	-1	0	-1	-1	0
NM_001256316	CHST9	3	0	3	0	-1	0	-1	0	-1	0	0
NM_001823	CKB	3	0	3	-1	0	-1	0	-1	0	0	0
NM_004669	CLIC3	3	0	3	0	0	0	-1	0	-1	-1	0
NM_015526	CLIP3	3	0	3	-1	0	-1	0	0	0	0	-1
NM_001831	CLU	3	0	3	-1	0	-1	-1	0	0	0	0
NM_001836	CMA1	3	0	3	-1	-1	-1	0	0	0	0	0
NM_015463	CNRIP1	3	0	3	-1	0	0	0	0	0	-1	-1
NM_175038	CNTN1	3	0	3	-1	0	-1	0	-1	0	0	0
NM_020872	CNTN3	3	0	3	-1	0	-1	0	-1	0	0	0
NM_001206956	CNTN4	3	0	3	-1	0	-1	0	0	0	-1	0
NM_000091	COL4A3	3	0	3	0	0	0	0	-1	-1	-1	0
NM_001102608	COL6A6	3	0	3	0	-1	0	0	0	-1	-1	0
NM_130386	COLEC12	3	0	3	-1	0	-1	0	0	0	-1	0
NM_001288820	CPEB1	3	0	3	-1	0	-1	0	0	0	0	-1
NM_198148	CPXM2	3	0	3	-1	0	-1	0	0	0	0	-1
NM_001014444	CRYM	3	0	3	-1	0	0	-1	0	0	-1	0
NM_014460	CSDC2	3	0	3	-1	0	0	0	-1	0	0	-1
NM_033027	CSRNP1	3	0	3	-1	0	0	0	0	-1	-1	0
NM_001193572	CSRP1	3	0	3	-1	0	-1	0	0	0	0	-1
NM_001168298	CXCR2	3	0	3	0	0	0	-1	0	-1	-1	0
NM_000774	CYP2F1	3	0	3	0	0	0	-1	0	-1	-1	0
NM_001278738	CYP39A1	3	0	3	-1	-1	0	0	-1	0	0	0
NM_001554	CYR61	3	0	3	-1	0	0	0	0	0	-1	-1
NM_145056	DACT3	3	0	3	-1	0	-1	0	0	0	0	-1
NM_004406	DMBT1	3	0	3	0	0	0	-1	0	-1	-1	0
NM_001164673	DOK7	3	0	3	0	0	0	0	-1	-1	-1	0
NM_001198938	DTNA	3	0	3	-1	0	-1	0	0	0	0	-1
NM_000114	EDN3	3	0	3	0	-1	-1	-1	0	0	0	0
NM_024768	EFCC1	3	0	3	-1	0	0	0	0	-1	-1	0
NM_001964	EGR1	3	0	3	-1	-1	0	0	0	0	0	-1
NM_000128	F11	3	0	3	0	0	0	0	-1	-1	-1	0
NM_001242312	FAM124A	3	0	3	-1	0	-1	0	-1	0	0	0
NM_001001971	FAM13C	3	0	3	0	-1	0	0	0	0	-1	-1
NM_001002919	FAM150B	3	0	3	0	-1	0	0	0	-1	-1	0
NM_053279	FAM167A	3	0	3	0	0	0	0	-1	-1	-1	0
NM_138805	FAM3D	3	0	3	0	-1	0	-1	0	-1	0	0
NM_203373	FBXL22	3	0	3	-1	0	-1	0	0	0	0	-1
NM_006832	FERMT2	3	0	3	-1	0	-1	0	0	0	-1	0
NM_004465	FGF10	3	0	3	-1	-1	-1	0	0	0	0	0
NM_031950	FGFBP2	3	0	3	0	-1	-1	0	0	-1	0	0
NM_006682	FGL2	3	0	3	-1	0	-1	0	0	0	0	-1
NM_015687	FILIP1	3	0	3	-1	0	-1	0	0	0	-1	0
NM_001127487	FLNC	3	0	3	-1	0	-1	0	0	0	0	-1
NM_013281	FLRT3	3	0	3	0	0	0	0	0	-1	-1	-1
NM_001461	FMO5	3	0	3	0	0	-1	0	-1	0	-1	0
NM_000802	FOLR1	3	0	3	0	-1	0	0	0	-1	-1	0
NM_001451	FOXF1	3	0	3	-1	0	0	0	0	-1	-1	0
NM_001177704	FREM1	3	0	3	-1	-1	0	0	-1	0	0	0
NM_014211	GABRP	3	0	3	0	-1	0	-1	-1	0	0	0
NM_054110	GALNT15	3	0	3	-1	-1	-1	0	0	0	0	0
NM_002048	GAS1	3	0	3	0	0	-1	0	-1	0	0	-1
NM_001145662	GATA2	3	0	3	0	0	0	0	-1	-1	-1	0
NM_001288704	GGT6	3	0	3	0	0	-1	-1	-1	0	0	0
NM_001287014	GLIPR2	3	0	3	0	0	-1	0	0	-1	-1	0
NM_138736	GNAO1	3	0	3	-1	0	-1	0	0	0	0	-1
NM_005814	GPA33	3	0	3	0	0	-1	0	0	-1	-1	0
NM_004466	GPC5	3	0	3	0	0	0	0	-1	-1	-1	0
NM_001271856	GRASP	3	0	3	-1	0	0	0	0	-1	-1	0
NM_002088	GRIK5	3	0	3	0	0	-1	0	-1	0	0	-1
NM_145740	GSTA1	3	0	3	0	-1	-1	-1	0	0	0	0
NM_000855	GUCY1A2	3	0	3	0	0	0	0	0	-1	-1	-1
NM_021973	HAND2	3	0	3	-1	0	-1	0	0	0	0	-1
NM_001039372	HEPACAM2	3	0	3	0	-1	-1	0	-1	0	0	0
NM_001287741	HMGCLL1	3	0	3	0	-1	0	0	0	-1	-1	0
NM_014485	HPGDS	3	0	3	-1	0	-1	0	0	0	-1	0
NM_001136230	HSD17B13	3	0	3	0	-1	0	0	0	-1	-1	0
NM_021979	HSPA2	3	0	3	-1	0	-1	0	-1	0	0	0
NM_001111285	IGF1	3	0	3	-1	-1	-1	0	0	0	0	0
NM_144646	IGJ	3	0	3	0	-1	-1	0	0	0	-1	0
NM_003856	IL1RL1	3	0	3	0	0	0	0	-1	-1	-1	0
NM_000600	IL6	3	0	3	-1	-1	0	0	0	0	-1	0
NM_001170738	IQSEC3	3	0	3	0	0	0	0	0	-1	-1	-1
NM_001134222	IRX2	3	0	3	0	0	0	0	-1	-1	-1	0
NM_024335	IRX6	3	0	3	0	-1	0	0	-1	-1	0	0
NM_001144997	ITGA7	3	0	3	-1	-1	0	0	0	0	0	-1
NM_080878	ITLN2	3	0	3	0	0	-1	0	0	-1	-1	0
NM_002222	ITPR1	3	0	3	-1	0	0	0	0	0	-1	-1
NM_001146028	JPH4	3	0	3	0	0	0	0	0	-1	-1	-1
NM_001099294	KIAA1644	3	0	3	-1	0	-1	0	0	0	0	-1
NM_025249	KIAA1683	3	0	3	0	-1	0	0	0	-1	-1	0
NM_175737	KLB	3	0	3	0	-1	0	0	0	-1	-1	0
NM_016270	KLF2	3	0	3	-1	0	0	0	0	0	-1	-1
NM_001136032	KLK11	3	0	3	0	-1	0	-1	0	-1	0	0
NM_002272	KRT4	3	0	3	0	0	0	-1	0	-1	-1	0
NM_178554	KY	3	0	3	-1	-1	0	0	0	0	0	-1
NM_001079823	LAMA2	3	0	3	-1	0	0	0	-1	0	0	-1
NM_001080116	LDB3	3	0	3	-1	0	-1	-1	0	0	0	0
NM_194436	LDHD	3	0	3	0	0	-1	-1	-1	0	0	0
NM_005780	LHFP	3	0	3	0	-1	0	0	0	0	-1	-1
NM_001081443	LILRB5	3	0	3	-1	-1	-1	0	0	0	0	0
NM_032211	LOXL4	3	0	3	0	-1	-1	0	0	0	0	-1
NM_000237	LPL	3	0	3	0	-1	0	0	0	-1	-1	0
NM_017753	LPPR1	3	0	3	0	-1	0	0	-1	-1	0	0
NM_152447	LRFN5	3	0	3	-1	-1	0	0	0	0	0	-1
NM_177476	LYNX1	3	0	3	-1	0	-1	0	0	0	0	-1
NM_033364	MAATS1	3	0	3	0	0	0	0	0	-1	-1	-1
NM_002753	MAPK10	3	0	3	0	-1	-1	0	0	0	0	-1
NM_006770	MARCO	3	0	3	0	-1	0	0	0	-1	-1	0
NM_030583	MATN2	3	0	3	-1	-1	-1	0	0	0	0	0
NM_032849	MEDAG	3	0	3	-1	-1	0	0	0	0	0	-1
NM_001193349	MEF2C	3	0	3	-1	0	0	0	0	0	-1	-1
NM_181644	MFSD4	3	0	3	0	0	-1	0	-1	0	-1	0
NM_001098270	MGAT3	3	0	3	0	-1	0	0	0	-1	-1	0
NM_000900	MGP	3	0	3	-1	0	-1	0	0	0	-1	0
NM_001584	MPPED2	3	0	3	0	-1	-1	0	-1	0	0	0
NM_002438	MRC1	3	0	3	0	-1	0	0	0	-1	-1	0
NM_031457	MS4A8	3	0	3	0	0	-1	0	0	-1	-1	0
NM_198080	MSRB3	3	0	3	-1	0	-1	0	0	0	0	-1
NM_001271733	MST1L	3	0	3	0	0	-1	0	-1	0	-1	0
NM_152793	MTURN	3	0	3	-1	-1	0	0	-1	0	0	0
NM_001290194	MYADM	3	0	3	-1	0	0	0	0	0	-1	-1
NM_181526	MYL9	3	0	3	-1	0	-1	0	0	0	0	-1
NM_021245	MYOZ1	3	0	3	0	0	0	-1	0	-1	-1	0
NM_013279	MYRF	3	0	3	0	0	0	0	0	-1	-1	-1
NM_001204197	NBEA	3	0	3	-1	0	-1	0	0	0	0	-1
NM_001160331	NFASC	3	0	3	-1	0	0	0	-1	0	0	-1
NM_002507	NGFR	3	0	3	-1	-1	-1	0	0	0	0	0
NM_006056	NMUR1	3	0	3	0	-1	0	0	0	-1	-1	0
NM_001204214	NOS1	3	0	3	0	0	-1	0	-1	-1	0	0
NM_001184692	NPNT	3	0	3	0	0	0	0	-1	-1	-1	0
NM_000909	NPY1R	3	0	3	0	0	-1	-1	0	0	-1	0
NM_021969	NR0B2	3	0	3	0	0	0	0	-1	-1	-1	0
NM_005654	NR2F1	3	0	3	-1	0	0	0	0	0	-1	-1
NM_006186	NR4A2	3	0	3	-1	0	0	0	0	0	-1	-1
NM_006981	NR4A3	3	0	3	-1	0	0	0	0	-1	-1	0
NM_004883	NRG2	3	0	3	-1	-1	0	-1	0	0	0	0
NM_001278710	NRN1	3	0	3	-1	-1	0	0	0	-1	0	0
NM_138735	NRXN1	3	0	3	-1	-1	-1	0	0	0	0	0
NM_138734	NRXN2	3	0	3	-1	0	-1	0	0	0	0	-1
NM_001007156	NTRK3	3	0	3	-1	-1	0	0	0	0	0	-1
NM_017855	ODAM	3	0	3	0	0	0	0	-1	-1	-1	0
NM_175881	ODF3L1	3	0	3	-1	0	0	0	0	-1	-1	0
NM_001282612	OLFM1	3	0	3	-1	0	-1	0	0	0	0	-1
NM_198474	OLFML1	3	0	3	-1	0	0	0	0	0	-1	-1
NM_145260	OSR1	3	0	3	0	-1	-1	0	0	0	-1	0
NM_080818	OXGR1	3	0	3	0	-1	0	-1	-1	0	0	0
NM_002558	P2RX1	3	0	3	-1	0	-1	0	0	0	-1	0
NM_007365	PADI2	3	0	3	0	0	-1	-1	-1	0	0	0
NM_001040134	PALM	3	0	3	0	0	-1	0	-1	0	0	-1
NM_002591	PCK1	3	0	3	0	-1	-1	0	-1	0	0	0
NM_001258313	PDE1A	3	0	3	-1	0	-1	0	-1	0	0	0
NM_018945	PDE7B	3	0	3	-1	0	-1	0	0	0	0	-1
NM_001029854	PDE8B	3	0	3	0	-1	0	0	0	0	-1	-1
NM_001114107	PDLIM3	3	0	3	-1	0	-1	0	0	0	0	-1
NM_178140	PDZD2	3	0	3	0	-1	0	0	0	-1	-1	0
NM_001080471	PEAR1	3	0	3	0	-1	0	0	0	-1	-1	0
NM_144962	PEBP4	3	0	3	0	0	0	-1	0	-1	-1	0
NM_002616	PER1	3	0	3	-1	-1	0	0	0	0	0	-1
NM_002652	PIP	3	0	3	0	-1	0	-1	0	0	-1	0
NM_138370	PKDCC	3	0	3	-1	-1	0	0	0	0	-1	0
NM_181839	PKIA	3	0	3	0	0	0	-1	-1	0	0	-1
NM_213600	PLA2G4F	3	0	3	0	0	0	0	-1	-1	-1	0
NM_000929	PLA2G5	3	0	3	-1	0	-1	0	0	0	-1	0
NM_001005473	PLCXD3	3	0	3	0	-1	0	0	-1	0	0	-1
NM_001013706	PLIN5	3	0	3	0	0	0	-1	-1	0	-1	0
NM_152286	PNPLA7	3	0	3	-1	0	0	-1	0	0	-1	0
NM_005398	PPP1R3C	3	0	3	0	0	-1	-1	0	0	0	-1
NM_181675	PPP2R2B	3	0	3	-1	0	-1	0	-1	0	0	0
NM_024870	PREX2	3	0	3	0	-1	0	0	0	-1	-1	0
NM_198859	PRICKLE2	3	0	3	-1	0	-1	0	0	0	0	-1
NM_212535	PRKCB	3	0	3	-1	0	-1	0	0	0	-1	0
NM_024320	PRR15L	3	0	3	0	0	0	-1	-1	0	-1	0
NM_153362	PRSS35	3	0	3	0	0	0	0	-1	-1	-1	0
NM_015225	PRUNE2	3	0	3	-1	0	0	0	0	0	-1	-1
NM_181882	PRX	3	0	3	0	0	0	0	0	-1	-1	-1
NM_002825	PTN	3	0	3	0	-1	-1	-1	0	0	0	0
NM_130843	PTPRN2	3	0	3	-1	0	0	0	0	0	-1	-1
NM_006105	RAPGEF3	3	0	3	0	-1	0	0	-1	0	-1	0
NM_001199989	RASD1	3	0	3	-1	-1	0	0	-1	0	0	0
NM_001098670	RASGRP2	3	0	3	-1	0	-1	0	0	0	-1	0
NM_004164	RBP2	3	0	3	0	0	0	0	-1	-1	-1	0
NM_001164730	REEP1	3	0	3	-1	0	-1	0	0	-1	0	0
NM_002923	RGS2	3	0	3	-1	-1	-1	0	0	0	0	0
NM_001286692	RGS22	3	0	3	0	0	0	0	0	-1	-1	-1
NM_001081955	RGS9	3	0	3	0	0	-1	0	0	-1	-1	0
NM_020663	RHOJ	3	0	3	-1	0	0	0	0	0	-1	-1
NM_001113561	RNF180	3	0	3	-1	0	-1	0	0	0	-1	0
NM_001165033	RNF182	3	0	3	0	0	0	0	-1	-1	-1	0
NM_005012	ROR1	3	0	3	-1	0	-1	0	0	0	-1	0
NM_019845	RPRM	3	0	3	0	0	-1	0	-1	0	0	-1
NM_004165	RRAD	3	0	3	-1	-1	0	0	0	0	-1	0
NM_001282863	RSPO2	3	0	3	0	0	-1	0	0	-1	-1	0
NM_032784	RSPO3	3	0	3	-1	-1	-1	0	0	0	0	0
NM_006272	S100B	3	0	3	-1	-1	-1	0	0	0	0	0
NM_153225	SBSPON	3	0	3	-1	0	0	0	0	-1	-1	0
NM_003357	SCGB1A1	3	0	3	0	0	0	-1	0	-1	-1	0
NM_002407	SCGB2A1	3	0	3	0	0	-1	0	-1	0	-1	0
NM_033128	SCIN	3	0	3	0	0	-1	-1	-1	0	0	0
NM_007281	SCRG1	3	0	3	-1	-1	-1	0	0	0	0	0
NM_002980	SCTR	3	0	3	0	0	0	0	-1	-1	-1	0
NM_001193336	SEC14L6	3	0	3	0	0	0	0	-1	-1	-1	0
NM_001178129	SEMA3E	3	0	3	-1	0	-1	0	0	0	-1	0
NM_005410	SEPP1	3	0	3	-1	0	-1	0	0	0	-1	0
NM_203451	SERTM1	3	0	3	0	0	0	0	0	-1	-1	-1
NM_003015	SFRP5	3	0	3	0	0	-1	0	0	-1	-1	0
NM_205854	SFTA2	3	0	3	0	0	0	-1	-1	0	-1	0
NM_001098668	SFTPA2	3	0	3	0	0	-1	0	0	-1	-1	0
NM_020859	SHROOM3	3	0	3	0	0	0	-1	-1	0	-1	0
NM_015865	SLC14A1	3	0	3	0	0	0	0	-1	-1	-1	0
NM_004731	SLC16A7	3	0	3	0	-1	0	-1	-1	0	0	0
NM_025243	SLC19A3	3	0	3	0	-1	0	0	0	-1	-1	0
NM_001177998	SLC34A2	3	0	3	0	-1	0	-1	0	0	-1	0
NM_001256314	SLC5A1	3	0	3	0	-1	0	-1	0	-1	0	0
NM_145913	SLC5A8	3	0	3	0	0	0	-1	0	-1	-1	0
NM_001045	SLC6A4	3	0	3	0	0	0	-1	0	-1	-1	0
NM_003064	SLPI	3	0	3	0	0	0	0	-1	-1	-1	0
NM_005905	SMAD9	3	0	3	-1	0	0	0	0	-1	-1	0
NM_003087	SNCG	3	0	3	0	-1	-1	0	0	0	0	-1
NM_001270471	SOCS2	3	0	3	0	-1	0	0	0	-1	0	-1
NM_001173476	SPEG	3	0	3	-1	0	-1	0	0	0	0	-1
NM_198993	STAC2	3	0	3	0	-1	0	-1	-1	0	0	0
NM_001289059	STK33	3	0	3	0	0	-1	0	-1	0	-1	0
NM_006873	STON1	3	0	3	-1	0	-1	0	0	0	0	-1
NM_033071	SYNE1	3	0	3	-1	0	0	0	0	0	-1	-1
NM_007286	SYNPO	3	0	3	-1	0	0	0	0	0	-1	-1
NM_001058	TACR1	3	0	3	-1	-1	0	0	0	0	0	-1
NM_001057	TACR2	3	0	3	-1	0	-1	0	0	0	0	-1
NM_003186	TAGLN	3	0	3	-1	0	-1	0	0	0	0	-1
NM_182499	TDRD10	3	0	3	0	-1	0	0	0	-1	-1	0
NM_198316	TENC1	3	0	3	-1	0	0	0	0	0	-1	-1
NM_001063	TF	3	0	3	0	-1	-1	-1	0	0	0	0
NM_003242	TGFBR2	3	0	3	0	-1	0	0	0	0	-1	-1
NM_000461	THRB	3	0	3	0	0	-1	0	-1	0	0	-1
NM_003256	TIMP4	3	0	3	-1	-1	0	-1	0	0	0	0
NM_001136103	TMEM132C	3	0	3	-1	-1	0	0	0	0	0	-1
NM_005656	TMPRSS2	3	0	3	0	0	0	-1	-1	0	-1	0
NM_001193451	TMTC1	3	0	3	0	-1	-1	0	0	0	0	-1
NM_001080430	TOX3	3	0	3	0	0	0	-1	-1	0	-1	0
NM_213674	TPM2	3	0	3	-1	0	-1	0	0	0	0	-1
NM_015964	TPPP3	3	0	3	-1	0	0	0	0	-1	-1	0
NM_003294	TPSAB1	3	0	3	-1	0	-1	0	0	0	-1	0
NM_012217	TPSD1	3	0	3	-1	0	-1	0	0	0	-1	0
NM_013381	TRHDE	3	0	3	0	-1	0	0	0	-1	-1	0
NM_005725	TSPAN2	3	0	3	-1	0	-1	0	0	0	0	-1
NM_001271893	TWIST2	3	0	3	-1	-1	-1	0	0	0	0	0
NM_000550	TYRP1	3	0	3	0	0	0	0	-1	-1	-1	0
NM_031941	USHBP1	3	0	3	0	-1	0	0	0	-1	-1	0
NM_001243759	USP2	3	0	3	-1	0	-1	0	-1	0	0	0
NM_005715	UST	3	0	3	0	0	-1	0	-1	0	0	-1
NM_001177970	VIT	3	0	3	-1	-1	0	-1	0	0	0	0
NM_006646	WASF3	3	0	3	0	-1	0	0	-1	-1	0	0
NM_015253	WSCD1	3	0	3	0	-1	-1	0	0	0	-1	0
NM_001171653	ZEB2	3	0	3	-1	0	0	0	0	0	-1	-1
NM_003407	ZFP36	3	0	3	-1	0	0	0	0	0	-1	-1
NM_003786	ABCC3	2	2	0	0	0	0	0	1	1	0	0
NM_001135	ACAN	2	2	0	0	0	1	0	1	0	0	0
NM_001164490	ADAM8	2	2	0	0	1	0	0	0	1	0	0
NM_030955	ADAMTS12	2	2	0	0	0	1	1	0	0	0	0
NM_014244	ADAMTS2	2	2	0	0	0	1	1	0	0	0	0
NM_005099	ADAMTS4	2	2	0	0	0	1	0	1	0	0	0
NM_014272	ADAMTS7	2	2	0	0	0	0	1	1	0	0	0
NM_001124	ADM	2	2	0	0	0	0	0	1	0	0	1
NM_013410	AK4	2	2	0	0	0	0	0	0	1	1	0
NM_001031615	ALDH3B2	2	2	0	0	0	0	0	0	0	1	1
NM_152345	ANKRD13B	2	2	0	0	0	1	0	0	0	1	0
NM_001091	AOC1	2	2	0	0	0	0	0	0	1	0	1
NM_001130414	APBA2	2	2	0	0	0	0	1	0	0	0	1
NM_001270411	APOBEC3B	2	2	0	0	1	0	0	0	0	1	0
NM_001039841	ARHGAP11B	2	2	0	1	0	0	0	0	0	1	0
NM_001248004	ARNTL2	2	2	0	0	0	0	0	0	1	1	0
NM_005170	ASCL2	2	2	0	0	0	1	0	0	0	0	1
NM_024857	ATAD5	2	2	0	1	0	0	0	0	0	1	0
NM_025153	ATP10B	2	2	0	0	0	0	0	0	1	1	0
NM_014256	B3GNT3	2	2	0	0	0	0	0	0	1	1	0
NM_025045	BAIAP2L2	2	2	0	0	0	0	0	0	1	1	0
NM_000057	BLM	2	2	0	1	0	0	0	0	0	1	0
NM_000059	BRCA2	2	2	0	1	0	1	0	0	0	0	0
NM_145018	C11orf82	2	2	0	1	0	0	0	0	0	1	0
NM_001130677	C17orf96	2	2	0	0	0	1	0	0	0	1	0
NM_001142569	C1orf106	2	2	0	0	0	0	0	0	1	1	0
NM_198463	C3orf67	2	2	0	1	0	0	0	0	0	1	0
NM_001168243	C4orf48	2	2	0	1	0	0	0	0	0	0	1
NM_206966	C5orf46	2	2	0	0	0	0	0	1	0	1	0
NM_014070	C6orf15	2	2	0	0	0	1	0	0	0	1	0
NM_153246	C6orf223	2	2	0	0	0	1	0	1	0	0	0
NM_138644	CABYR	2	2	0	0	0	0	0	0	1	1	0
NM_012114	CASP14	2	2	0	0	0	0	1	0	0	1	0
NM_001761	CCNF	2	2	0	0	0	0	0	0	0	1	1
NM_001252	CD70	2	2	0	0	0	0	1	1	0	0	0
NM_033100	CDHR1	2	2	0	0	0	0	0	1	0	1	0
NM_018689	CEMIP	2	2	0	0	1	1	0	0	0	0	0
NM_024629	CENPU	2	2	0	0	0	0	0	0	0	1	1
NM_005441	CHAF1B	2	2	0	1	0	0	0	0	0	1	0
NM_000745	CHRNA5	2	2	0	0	0	0	0	0	1	1	0
NM_007174	CIT	2	2	0	1	0	0	0	0	0	0	1
NM_001827	CKS2	2	2	0	0	1	0	0	0	0	0	1
NM_013252	CLEC5A	2	2	0	0	1	0	0	1	0	0	0
NM_001845	COL4A1	2	2	0	0	0	0	1	1	0	0	0
NM_020351	COL8A1	2	2	0	0	0	0	1	1	0	0	0
NM_001163446	CPA4	2	2	0	1	0	0	0	0	0	1	0
NM_153636	CPNE7	2	2	0	0	0	1	0	0	1	0	0
NM_005213	CSTA	2	2	0	0	0	0	0	1	0	1	0
NM_001565	CXCL10	2	2	0	0	1	0	0	1	0	0	0
NM_002416	CXCL9	2	2	0	0	1	0	0	1	0	0	0
NM_001001665	CYP27C1	2	2	0	0	0	0	1	0	0	1	0
NM_001258368	DIAPH3	2	2	0	0	1	0	0	0	0	0	1
NM_001038493	DLX1	2	2	0	0	0	0	1	0	0	1	0
NM_001080449	DNA2	2	2	0	0	0	0	0	0	0	1	1
NM_001944	DSG3	2	2	0	0	0	1	0	0	0	1	0
NM_001008844	DSP	2	2	0	0	0	0	0	0	1	1	0
NM_182689	EFNA4	2	2	0	0	0	0	0	0	1	0	1
NM_004095	EIF4EBP1	2	2	0	0	0	0	0	0	0	1	1
NM_001427	EN2	2	2	0	0	0	0	1	0	0	0	1
NM_001975	ENO2	2	2	0	0	0	0	1	1	0	0	0
NM_173567	EPHX4	2	2	0	0	0	1	0	0	1	0	0
NM_004950	EPYC	2	2	0	0	1	1	0	0	0	0	0
NM_001040442	FABP6	2	2	0	0	0	1	0	1	0	0	0
NM_001288587	FAM83A	2	2	0	0	0	0	0	0	1	1	0
NM_001161359	FCHO1	2	2	0	1	0	0	0	1	0	0	0
NM_004111	FEN1	2	2	0	0	0	0	0	0	0	1	1
NM_017671	FERMT1	2	2	0	0	0	0	0	0	1	1	0
NM_001160264	FEZF1	2	2	0	0	0	0	0	0	1	1	0
NM_004112	FGF11	2	2	0	0	0	0	0	0	1	1	0
NM_005117	FGF19	2	2	0	0	0	1	0	0	0	0	1
NM_021939	FKBP10	2	2	0	0	0	0	1	1	0	0	0
NM_212474	FN1	2	2	0	0	1	0	1	0	0	0	0
NM_004472	FOXD1	2	2	0	0	0	0	1	0	0	1	0
NM_003088	FSCN1	2	2	0	0	0	0	1	0	0	1	0
NM_013409	FST	2	2	0	0	0	0	1	0	0	1	0
NM_001097638	FUT2	2	2	0	0	0	0	0	0	1	1	0
NM_000815	GABRD	2	2	0	0	1	0	0	1	0	0	0
NM_001253827	GALNT14	2	2	0	0	0	0	0	0	1	1	0
NM_007210	GALNT6	2	2	0	1	0	1	0	0	0	0	0
NM_000805	GAST	2	2	0	0	0	0	1	0	0	1	0
NM_001134486	GBP5	2	2	0	0	0	0	1	1	0	0	0
NM_004864	GDF15	2	2	0	0	0	1	0	0	0	0	1
NM_003878	GGH	2	2	0	1	0	0	0	0	0	1	0
NM_032336	GINS4	2	2	0	0	0	0	0	0	1	1	0
NM_001005752	GJB3	2	2	0	0	0	0	0	0	1	1	0
NM_153212	GJB4	2	2	0	0	0	1	0	0	0	1	0
NM_001080383	GJC1	2	2	0	0	0	0	1	1	0	0	0
NM_145016	GLYATL2	2	2	0	0	0	0	0	0	0	1	1
NM_153838	GPR115	2	2	0	0	0	0	0	0	1	1	0
NM_023915	GPR87	2	2	0	0	0	0	0	0	1	1	0
NM_198182	GRHL1	2	2	0	0	0	1	0	0	0	1	0
NM_004131	GZMB	2	2	0	0	0	1	0	1	0	0	0
NM_032304	HAGHL	2	2	0	0	1	1	0	0	0	0	0
NM_001282434	HES6	2	2	0	0	1	0	0	0	0	0	1
NM_001098786	HILPDA	2	2	0	0	0	0	0	1	0	0	1
NM_021052	HIST1H2AE	2	2	0	0	1	0	0	0	0	1	0
NM_021063	HIST1H2BD	2	2	0	0	1	0	0	0	1	0	0
NM_003518	HIST1H2BG	2	2	0	0	1	0	0	0	0	1	0
NM_003524	HIST1H2BH	2	2	0	1	0	0	0	0	0	1	0
NM_003530	HIST1H3D	2	2	0	0	1	0	0	0	0	1	0
NM_003536	HIST1H3H	2	2	0	0	1	0	1	0	0	0	0
NM_033445	HIST3H2A	2	2	0	1	0	0	0	0	0	1	0
NM_145903	HMGA1	2	2	0	0	0	0	0	0	1	1	0
NM_001199829	HORMAD1	2	2	0	0	0	0	0	0	1	1	0
NM_153620	HOXA1	2	2	0	0	0	0	1	0	0	1	0
NM_006361	HOXB13	2	2	0	0	1	0	0	0	0	0	1
NM_004502	HOXB7	2	2	0	0	0	0	1	0	0	0	1
NM_002148	HOXD10	2	2	0	0	0	0	1	0	0	1	0
NM_000523	HOXD13	2	2	0	0	0	0	1	0	0	1	0
NM_000864	HTR1D	2	2	0	0	0	1	0	0	1	0	0
NM_000872	HTR7	2	2	0	0	0	0	1	0	0	1	0
NM_004967	IBSP	2	2	0	0	1	0	1	0	0	0	0
NM_002164	IDO1	2	2	0	0	0	0	0	1	0	0	1
NM_002038	IFI6	2	2	0	0	1	0	1	0	0	0	0
NM_000598	IGFBP3	2	2	0	0	0	0	0	1	0	1	0
NM_020789	IGSF9	2	2	0	0	0	0	0	0	1	1	0
NM_003854	IL1RL2	2	2	0	0	0	0	0	0	1	1	0
NM_144717	IL20RB	2	2	0	0	0	0	0	1	0	1	0
NM_021798	IL21R	2	2	0	0	1	0	0	1	0	0	0
NM_021258	IL22RA1	2	2	0	1	0	0	0	0	0	1	0
NM_016584	IL23A	2	2	0	0	0	1	0	0	0	1	0
NM_002205	ITGA5	2	2	0	0	0	0	1	1	0	0	0
NM_002220	ITPKA	2	2	0	0	0	0	0	0	1	1	0
NM_144616	JSRP1	2	2	0	0	0	0	0	0	1	0	1
NM_001160134	KCNQ5	2	2	0	0	0	0	0	0	1	1	0
NM_001039548	KLHL35	2	2	0	1	0	1	0	0	0	0	0
NM_002266	KPNA2	2	2	0	0	0	0	0	0	0	1	1
NM_024507	KREMEN2	2	2	0	0	1	0	0	0	0	1	0
NM_005557	KRT16	2	2	0	0	0	0	0	0	1	1	0
NM_001199897	LAMP5	2	2	0	0	1	0	1	0	0	0	0
NM_001166119	LEF1	2	2	0	0	0	1	0	0	0	0	1
NM_002318	LOXL2	2	2	0	0	0	0	1	1	0	0	0
NM_033300	LRP8	2	2	0	1	0	1	0	0	0	0	0
NM_014400	LYPD3	2	2	0	0	0	0	0	0	1	1	0
NM_002358	MAD2L1	2	2	0	0	0	0	0	0	1	1	0
NM_012324	MAPK8IP2	2	2	0	1	1	0	0	0	0	0	0
NM_004526	MCM2	2	2	0	1	0	0	0	0	0	1	0
NM_182746	MCM4	2	2	0	0	0	0	0	0	1	1	0
NM_001270552	MDK	2	2	0	0	0	0	0	0	1	1	0
NM_002415	MIF	2	2	0	0	0	0	0	0	0	1	1
NM_016447	MPP6	2	2	0	0	0	1	0	0	0	1	0
NM_005098	MSC	2	2	0	0	0	0	1	1	0	0	0
NM_002442	MSI1	2	2	0	0	0	0	0	0	0	1	1
NM_004923	MTL5	2	2	0	0	0	0	0	0	1	1	0
NM_001114090	NGEF	2	2	0	0	0	0	0	0	1	1	0
NM_006681	NMU	2	2	0	0	0	0	0	0	1	1	0
NM_152398	OCIAD2	2	2	0	0	0	0	0	0	1	0	1
NM_016233	PADI3	2	2	0	0	0	0	1	0	0	1	0
NM_002571	PAEP	2	2	0	0	0	0	1	0	1	0	0
NM_001207012	PGF	2	2	0	0	0	0	0	1	0	1	0
NM_001168357	PLA2G7	2	2	0	0	0	0	1	1	0	0	0
NM_016445	PLEK2	2	2	0	0	0	0	0	0	1	1	0
NM_052909	PLEKHG4B	2	2	0	0	0	0	1	0	0	1	0
NM_001193435	PLEKHS1	2	2	0	0	0	1	0	0	0	0	1
NM_138689	PPP1R14B	2	2	0	0	0	0	0	0	0	1	1
NM_014353	RAB26	2	2	0	0	1	0	0	0	1	0	0
NM_005052	RAC3	2	2	0	1	0	0	0	0	0	1	0
NM_001126104	RACGAP1	2	2	0	0	0	0	0	0	0	1	1
NM_006479	RAD51AP1	2	2	0	1	0	0	0	0	0	1	0
NM_001193521	RASAL1	2	2	0	0	0	0	0	0	1	1	0
NM_080833	RBBP8NL	2	2	0	0	0	0	0	0	0	1	1
NM_173587	RCOR2	2	2	0	0	0	0	0	0	1	1	0
NM_145654	RDM1	2	2	0	1	0	0	0	0	0	1	0
NM_002909	REG1A	2	2	0	0	0	1	0	1	0	0	0
NM_001278721	RHBDL1	2	2	0	0	0	0	0	0	1	1	0
NM_133639	RHOV	2	2	0	0	0	0	0	0	1	1	0
NM_052924	RHPN1	2	2	0	1	0	1	0	0	0	0	0
NM_002963	S100A7	2	2	0	0	1	0	0	0	0	1	0
NM_030760	S1PR5	2	2	0	0	0	0	0	1	0	1	0
NM_020436	SALL4	2	2	0	1	0	1	0	0	0	0	0
NM_002997	SDC1	2	2	0	0	1	0	0	0	0	0	1
NM_006843	SDS	2	2	0	0	1	0	0	1	0	0	0
NM_000602	SERPINE1	2	2	0	0	0	1	1	0	0	0	0
NM_006142	SFN	2	2	0	0	0	0	0	0	0	1	1
NM_001161443	SH2D2A	2	2	0	0	0	0	1	1	0	0	0
NM_001163678	SHOX2	2	2	0	0	0	0	1	0	0	1	0
NM_001146173	SLAMF9	2	2	0	0	0	0	1	0	0	1	0
NM_003051	SLC16A1	2	2	0	0	0	0	0	1	0	1	0
NM_001206952	SLC16A3	2	2	0	0	1	0	0	1	0	0	0
NM_022082	SLC17A9	2	2	0	0	0	1	0	1	0	0	0
NM_001270953	SLC25A10	2	2	0	0	0	0	0	0	0	1	1
NM_003104	SORD	2	2	0	0	0	0	0	0	0	1	1
NM_001281988	SPOCD1	2	2	0	0	1	0	1	0	0	0	0
NM_004598	SPOCK1	2	2	0	0	0	0	0	0	1	1	0
NM_003125	SPRR1B	2	2	0	0	0	0	0	0	1	1	0
NM_003129	SQLE	2	2	0	0	1	1	0	0	0	0	0
NM_080823	SRMS	2	2	0	0	1	1	0	0	0	0	0
NM_001110199	SRRM3	2	2	0	0	0	0	0	0	1	1	0
NM_012449	STEAP1	2	2	0	0	0	0	0	0	1	1	0
NM_207342	STEAP1B	2	2	0	0	0	0	0	0	1	1	0
NM_018423	STYK1	2	2	0	0	0	0	0	0	1	1	0
NM_024893	SYNDIG1	2	2	0	0	1	0	0	0	0	1	0
NM_004209	SYNGR3	2	2	0	0	1	0	0	0	1	0	0
NM_177963	SYT12	2	2	0	0	0	0	0	0	1	1	0
NM_006342	TACC3	2	2	0	0	1	0	0	0	0	0	1
NM_152380	TBX15	2	2	0	0	0	0	0	1	1	0	0
NM_005651	TDO2	2	2	0	0	1	0	1	0	0	0	0
NM_001199092	TDRD5	2	2	0	1	0	0	0	0	0	1	0
NM_003225	TFF1	2	2	0	0	1	0	0	0	1	0	0
NM_003920	TIMELESS	2	2	0	0	0	0	0	0	0	1	1
NM_024943	TMEM156	2	2	0	0	0	0	0	1	1	0	0
NM_020431	TMEM63C	2	2	0	0	0	0	0	0	1	1	0
NM_153229	TMEM92	2	2	0	0	0	0	1	1	0	0	0
NM_001206789	TMPRSS13	2	2	0	0	0	1	0	0	0	0	1
NM_001561	TNFRSF9	2	2	0	0	0	0	1	1	0	0	0
NM_003326	TNFSF4	2	2	0	0	1	0	1	0	0	0	0
NM_003811	TNFSF9	2	2	0	0	0	1	0	1	0	0	0
NM_018965	TREM2	2	2	0	0	0	0	1	1	0	0	0
NM_021158	TRIB3	2	2	0	0	0	1	0	1	0	0	0
NM_003307	TRPM2	2	2	0	0	0	0	0	1	0	0	1
NM_000474	TWIST1	2	2	0	0	0	0	0	0	1	1	0
NM_006398	UBD	2	2	0	0	0	1	0	1	0	0	0
NM_033199	UCN2	2	2	0	0	0	0	1	0	0	1	0
NM_173561	UNC5CL	2	2	0	0	0	1	0	0	1	0	0
NM_001126336	VCAN	2	2	0	0	0	0	1	1	0	0	0
NM_001008396	WDHD1	2	2	0	1	0	0	0	0	0	1	0
NM_144668	WDR66	2	2	0	0	0	0	1	0	0	1	0
NM_030753	WNT3	2	2	0	1	0	1	0	0	0	0	0
NM_033132	ZIC5	2	2	0	0	0	0	1	0	0	1	0
NM_001204221	ZNF695	2	2	0	1	0	0	0	0	0	1	0
NM_001205251	ACSL6	2	1	1	0	0	1	0	-1	0	0	0
NM_139056	ADAMTS16	2	1	1	0	0	0	0	-1	1	0	0
NM_000677	ADORA3	2	1	1	0	0	-1	0	1	0	0	0
NM_205845	AKR1C2	2	1	1	0	-1	0	0	0	0	1	0
NM_001135167	ALDH3A1	2	1	1	0	-1	0	0	0	0	1	0
NM_005165	ALDOC	2	1	1	0	-1	0	0	1	0	0	0
NM_001039131	ALOX15B	2	1	1	0	0	0	0	1	0	-1	0
NM_001256154	ALOX5	2	1	1	0	0	0	0	1	0	-1	0
NM_001039667	ANGPTL4	2	1	1	0	-1	0	0	1	0	0	0
NM_001150	ANPEP	2	1	1	0	0	-1	0	0	0	0	1
NM_004306	ANXA13	2	1	1	0	0	0	0	1	0	0	-1
NM_019043	APBB1IP	2	1	1	0	0	0	0	1	0	-1	0
NM_000384	APOB	2	1	1	0	-1	0	0	1	0	0	0
NM_014508	APOBEC3C	2	1	1	0	0	0	0	1	0	0	-1
NM_001652	AQP6	2	1	1	0	0	0	0	-1	0	0	1
NM_001198726	ARHGAP8	2	1	1	1	0	0	0	-1	0	0	0
NM_032189	ATP11A	2	1	1	0	0	1	0	0	0	-1	0
NM_173593	B4GALNT3	2	1	1	0	0	0	0	-1	0	0	1
NM_003986	BBOX1	2	1	1	0	-1	0	0	0	0	1	0
NM_004051	BDH1	2	1	1	0	0	0	0	-1	0	1	0
NM_001197	BIK	2	1	1	0	0	0	0	-1	0	1	0
NM_001290008	BIN2	2	1	1	0	0	0	0	1	0	-1	0
NM_001256793	BMPR1B	2	1	1	0	1	0	0	-1	0	0	0
NM_001017523	BTBD11	2	1	1	0	0	0	0	-1	0	1	0
NM_015991	C1QA	2	1	1	0	0	0	0	1	0	-1	0
NM_000491	C1QB	2	1	1	0	0	0	0	1	0	-1	0
NM_174896	C1orf162	2	1	1	0	0	0	0	1	0	-1	0
NM_178840	C1orf64	2	1	1	0	0	0	0	-1	0	0	1
NM_001178063	C2	2	1	1	0	0	0	0	1	0	-1	0
NM_001007176	C8orf22	2	1	1	0	0	0	-1	1	0	0	0
NM_206925	CA12	2	1	1	0	0	-1	0	0	0	1	0
NM_012337	CCDC19	2	1	1	0	1	0	0	0	0	-1	0
NM_207311	CCDC64	2	1	1	0	1	0	0	-1	0	0	0
NM_002986	CCL11	2	1	1	0	0	0	1	-1	0	0	0
NM_002991	CCL24	2	1	1	0	0	1	0	0	-1	0	0
NM_203416	CD163	2	1	1	0	0	0	0	1	0	-1	0
NM_170780	CD200R1	2	1	1	0	0	-1	0	1	0	0	0
NM_001166664	CD244	2	1	1	0	0	0	0	1	0	-1	0
NM_174892	CD300LB	2	1	1	0	0	0	0	1	0	-1	0
NM_001082618	CD33	2	1	1	0	0	0	0	1	0	-1	0
NM_001778	CD48	2	1	1	0	0	-1	0	1	0	0	0
NM_016952	CDON	2	1	1	0	0	0	0	1	0	0	-1
NM_001205344	CEACAM1	2	1	1	0	0	0	-1	0	0	0	1
NM_022097	CHP2	2	1	1	0	0	-1	0	0	0	1	0
NM_001015001	CKMT1A	2	1	1	0	0	0	0	-1	0	1	0
NM_020990	CKMT1B	2	1	1	0	0	0	0	-1	0	1	0
NM_006536	CLCA2	2	1	1	0	-1	0	0	0	0	1	0
NM_020348	CNNM1	2	1	1	-1	0	0	0	0	0	1	0
NM_080805	COL13A1	2	1	1	0	0	0	1	0	0	-1	0
NM_133457	COL26A1	2	1	1	0	0	0	0	-1	0	0	1
NM_057166	COL6A3	2	1	1	0	0	0	1	0	0	0	-1
NM_001877	CR2	2	1	1	0	0	0	0	-1	1	0	0
NM_019060	CRCT1	2	1	1	0	0	0	-1	0	0	1	0
NM_001271997	CREB3L3	2	1	1	0	0	-1	0	1	0	0	0
NM_004750	CRLF1	2	1	1	0	0	-1	0	0	1	0	0
NM_019604	CRTAM	2	1	1	0	0	0	0	1	0	-1	0
NM_001897	CSPG4	2	1	1	-1	0	0	0	1	0	0	0
NM_004079	CTSS	2	1	1	0	0	0	0	1	0	-1	0
NM_001511	CXCL1	2	1	1	0	-1	1	0	0	0	0	0
NM_000775	CYP2J2	2	1	1	0	0	0	-1	1	0	0	0
NM_001082	CYP4F2	2	1	1	0	0	0	0	-1	0	1	0
NM_001199209	CYP4F3	2	1	1	0	0	0	0	-1	0	1	0
NM_178033	CYP4X1	2	1	1	0	0	0	-1	0	0	0	1
NM_001017920	DAPL1	2	1	1	0	0	0	-1	0	0	1	0
NM_001127453	DFNA5	2	1	1	0	0	0	1	0	0	0	-1
NM_001142271	DHRS9	2	1	1	0	0	-1	0	1	0	0	0
NM_001039716	DIO1	2	1	1	0	1	0	0	-1	0	0	0
NM_014420	DKK4	2	1	1	0	0	1	-1	0	0	0	0
NM_033105	DNAJC5B	2	1	1	0	0	0	0	1	0	-1	0
NM_004946	DOCK2	2	1	1	0	0	0	0	1	0	-1	0
NM_003974	DOK2	2	1	1	0	0	0	0	1	0	-1	0
NM_001178034	DPP10	2	1	1	0	0	-1	0	0	0	0	1
NM_001941	DSC3	2	1	1	0	-1	0	0	0	0	1	0
NM_001942	DSG1	2	1	1	0	-1	0	0	0	0	1	0
NM_001135557	DYNC1I1	2	1	1	0	0	-1	0	0	0	1	0
NM_014601	EHD2	2	1	1	0	0	0	0	1	0	0	-1
NM_006495	EVI2B	2	1	1	0	0	0	0	1	0	-1	0
NM_003950	F2RL3	2	1	1	0	0	0	0	1	0	-1	0
NM_001014980	FAM132A	2	1	1	0	0	-1	0	0	0	1	0
NM_001447	FAT2	2	1	1	0	-1	0	0	0	0	1	0
NM_178820	FBXO27	2	1	1	0	0	-1	0	0	0	1	0
NM_001002273	FCGR2B	2	1	1	0	0	-1	0	1	0	0	0
NM_000570	FCGR3B	2	1	1	0	0	0	0	1	0	-1	0
NM_001004310	FCRL6	2	1	1	0	0	0	0	1	0	-1	0
NM_152997	FDCSP	2	1	1	0	-1	0	0	0	1	0	0
NM_173558	FGD2	2	1	1	0	0	0	0	1	0	-1	0
NM_003862	FGF18	2	1	1	0	0	0	0	0	0	-1	1
NM_005130	FGFBP1	2	1	1	0	-1	0	0	0	0	1	0
NM_000509	FGG	2	1	1	0	0	0	0	1	0	-1	0
NM_004496	FOXA1	2	1	1	0	0	0	-1	0	0	0	1
NM_153675	FOXA2	2	1	1	0	0	0	0	0	0	-1	1
NM_002034	FUT5	2	1	1	0	0	0	-1	0	1	0	0
NM_001040701	FUT6	2	1	1	0	0	0	-1	0	1	0	0
NM_005971	FXYD3	2	1	1	0	0	0	0	-1	0	0	1
NM_002045	GAP43	2	1	1	0	0	-1	0	0	0	1	0
NM_152687	GAPT	2	1	1	0	0	0	0	1	0	-1	0
NM_004120	GBP2	2	1	1	0	0	0	0	1	0	0	-1
NM_145649	GCNT2	2	1	1	0	0	-1	0	0	0	0	1
NM_003608	GPR65	2	1	1	0	0	0	0	1	0	-1	0
NM_001112812	GRIA4	2	1	1	0	-1	0	0	1	0	0	0
NM_000831	GRIK3	2	1	1	0	0	-1	0	1	0	0	0
NM_033423	GZMH	2	1	1	0	0	0	0	1	0	-1	0
NM_001258351	GZMM	2	1	1	0	0	0	0	1	0	-1	0
NM_025130	HKDC1	2	1	1	0	0	0	1	0	0	-1	0
NM_001242525	HLA_DPA1	2	1	1	0	0	0	0	1	0	-1	0
NM_002122	HLA_DQA1	2	1	1	0	0	0	0	1	0	-1	0
NM_020056	HLA_DQA2	2	1	1	0	0	0	0	1	0	-1	0
NM_002123	HLA_DQB1	2	1	1	0	0	0	0	1	0	-1	0
NM_001198858	HLA_DQB2	2	1	1	0	0	0	0	1	0	-1	0
NM_020386	HRASLS	2	1	1	0	0	0	-1	0	0	1	0
NM_003259	ICAM5	2	1	1	0	0	0	1	0	0	-1	0
NM_000597	IGFBP2	2	1	1	0	0	0	0	-1	0	1	0
NM_152855	IGLL1	2	1	1	0	0	-1	0	0	1	0	0
NM_001015887	IGSF11	2	1	1	0	0	0	0	-1	0	1	0
NM_000575	IL1A	2	1	1	0	0	0	1	0	-1	0	0
NM_001206696	IRF6	2	1	1	0	0	0	0	-1	0	1	0
NM_016358	IRX4	2	1	1	0	-1	0	0	0	0	1	0
NM_001114380	ITGAL	2	1	1	0	0	0	0	1	0	-1	0
NM_005546	ITK	2	1	1	0	0	0	0	1	0	-1	0
NM_181712	KANK4	2	1	1	0	0	0	0	0	-1	0	1
NM_022358	KCNK15	2	1	1	0	1	0	0	-1	0	0	0
NM_001258222	KCTD1	2	1	1	0	0	0	0	-1	0	1	0
NM_001271864	KLHDC8A	2	1	1	0	0	0	-1	0	1	0	0
NM_145895	KLK12	2	1	1	0	0	0	-1	0	0	1	0
NM_007334	KLRD1	2	1	1	0	0	0	0	1	0	-1	0
NM_002275	KRT15	2	1	1	0	-1	0	0	0	0	1	0
NM_000424	KRT5	2	1	1	0	-1	0	0	0	0	1	0
NM_173352	KRT78	2	1	1	0	0	0	-1	0	0	1	0
NM_001289023	LAIR1	2	1	1	0	0	0	0	1	0	-1	0
NM_005559	LAMA1	2	1	1	0	0	-1	1	0	0	0	0
NM_001127718	LAMA3	2	1	1	0	-1	0	1	0	0	0	0
NM_002290	LAMA4	2	1	1	0	0	0	0	1	0	0	-1
NM_005562	LAMC2	2	1	1	0	0	0	1	-1	0	0	0
NM_014146	LAT2	2	1	1	0	0	0	0	1	0	-1	0
NM_001142536	LGALS12	2	1	1	0	-1	0	0	1	0	0	0
NM_001277227	LGR5	2	1	1	0	0	1	0	-1	0	0	0
NM_001290270	LILRA2	2	1	1	0	0	0	0	1	0	-1	0
NM_006864	LILRB3	2	1	1	0	0	0	0	1	0	-1	0
NM_001080434	LMTK3	2	1	1	0	0	1	0	-1	0	0	0
NM_024830	LPCAT1	2	1	1	0	0	0	0	1	0	-1	0
NM_001166538	LST1	2	1	1	0	0	0	0	1	0	-1	0
NM_002345	LUM	2	1	1	0	0	0	1	-1	0	0	0
NM_004271	LY86	2	1	1	0	0	0	0	1	0	-1	0
NM_001261457	LY9	2	1	1	0	0	-1	0	1	0	0	0
NM_177964	LYPD6B	2	1	1	0	0	0	0	-1	0	1	0
NM_182762	MACC1	2	1	1	0	0	1	-1	0	0	0	0
NM_005434	MALL	2	1	1	0	0	-1	0	1	0	0	0
NM_000245	MET	2	1	1	0	-1	1	0	0	0	0	0
NM_005929	MFI2	2	1	1	0	0	0	0	-1	0	1	0
NM_032623	MGARP	2	1	1	0	-1	0	0	1	0	0	0
NM_001104548	MIR205HG	2	1	1	0	-1	0	0	0	0	1	0
NM_173481	MISP	2	1	1	0	1	0	0	-1	0	0	0
NM_032954	MLXIPL	2	1	1	0	-1	1	0	0	0	0	0
NM_002432	MNDA	2	1	1	0	0	0	0	1	0	-1	0
NM_001079692	MS4A14	2	1	1	0	0	0	0	1	0	-1	0
NM_002448	MSX1	2	1	1	-1	0	1	0	0	0	0	0
NM_005954	MT3	2	1	1	0	0	-1	0	0	0	0	1
NM_058173	MUCL1	2	1	1	0	-1	0	0	0	0	1	0
NM_002467	MYC	2	1	1	0	0	1	0	0	0	0	-1
NM_012335	MYO1F	2	1	1	0	0	0	0	1	0	-1	0
NM_033054	MYO1G	2	1	1	0	0	0	0	1	0	-1	0
NM_001184976	NCKAP1L	2	1	1	0	0	0	0	1	0	-1	0
NM_001010980	NCMAP	2	1	1	0	0	0	0	0	0	-1	1
NM_145912	NFAM1	2	1	1	0	0	0	0	1	0	-1	0
NM_001172292	NIPAL4	2	1	1	0	0	-1	0	0	0	1	0
NM_005601	NKG7	2	1	1	0	0	0	0	1	0	-1	0
NM_014932	NLGN1	2	1	1	-1	0	0	0	1	0	0	0
NM_024409	NPPC	2	1	1	0	0	0	-1	0	0	1	0
NM_201279	NRP2	2	1	1	0	0	0	0	1	0	0	-1
NM_001143997	OGDHL	2	1	1	0	0	0	0	-1	0	1	0
NM_001282715	OLFML2A	2	1	1	0	0	0	0	1	0	0	-1
NM_030774	OR51E2	2	1	1	0	0	-1	0	1	0	0	0
NM_000607	ORM1	2	1	1	0	1	0	0	0	0	-1	0
NM_002563	P2RY1	2	1	1	0	0	-1	0	1	0	0	0
NM_000277	PAH	2	1	1	0	0	1	0	-1	0	0	0
NM_001137605	PARVG	2	1	1	0	0	0	0	1	0	-1	0
NM_006194	PAX9	2	1	1	0	0	0	-1	0	0	1	0
NM_002638	PI3	2	1	1	0	-1	0	0	0	0	1	0
NM_001251855	PIK3R5	2	1	1	0	0	0	0	1	0	-1	0
NM_007183	PKP3	2	1	1	0	0	0	0	-1	0	1	0
NM_007257	PNMA2	2	1	1	0	0	0	0	1	0	-1	0
NM_020700	PPM1H	2	1	1	0	0	1	0	-1	0	0	0
NM_058237	PPP4R4	2	1	1	0	0	0	1	0	-1	0	0
NM_005041	PRF1	2	1	1	0	0	0	0	1	0	-1	0
NM_000312	PROC	2	1	1	0	0	0	1	-1	0	0	0
NM_002763	PROX1	2	1	1	0	0	1	0	-1	0	0	0
NM_175887	PRR15	2	1	1	0	0	0	0	-1	0	0	1
NM_022119	PRSS22	2	1	1	0	0	1	0	-1	0	0	0
NM_031948	PRSS27	2	1	1	0	0	0	-1	0	0	1	0
NM_002773	PRSS8	2	1	1	0	0	0	0	-1	0	0	1
NM_080921	PTPRC	2	1	1	0	0	0	0	1	0	-1	0
NM_001145658	RAP1GAP	2	1	1	1	0	0	0	-1	0	0	0
NM_020630	RET	2	1	1	0	1	-1	0	0	0	0	0
NM_001035223	RGL3	2	1	1	0	0	0	0	0	0	-1	1
NM_130782	RGS18	2	1	1	0	0	0	0	1	0	-1	0
NM_173642	RIMKLA	2	1	1	0	0	0	0	1	0	-1	0
NM_017763	RNF43	2	1	1	0	0	1	0	-1	0	0	0
NM_020672	S100A14	2	1	1	0	1	0	0	-1	0	0	0
NM_001277185	SAMD3	2	1	1	0	0	0	0	1	0	-1	0
NM_006998	SCGN	2	1	1	0	0	-1	0	1	0	0	0
NM_003006	SELPLG	2	1	1	0	0	0	0	1	0	-1	0
NM_001002235	SERPINA1	2	1	1	0	0	0	0	0	0	-1	1
NM_080475	SERPINB11	2	1	1	0	0	0	-1	0	0	1	0
NM_001007538	SHISA2	2	1	1	0	0	1	0	-1	0	0	0
NM_023068	SIGLEC1	2	1	1	0	0	0	0	1	0	-1	0
NM_005073	SLC15A1	2	1	1	0	0	-1	0	0	0	1	0
NM_005495	SLC17A4	2	1	1	0	0	-1	0	1	0	0	0
NM_018242	SLC47A1	2	1	1	0	0	0	0	0	0	-1	1
NM_001284351	SLC9A3	2	1	1	0	0	0	0	-1	0	1	0
NM_001253793	SMIM22	2	1	1	0	1	0	0	-1	0	0	0
NM_001286138	SMPDL3A	2	1	1	0	0	-1	0	1	0	0	0
NM_152628	SNX31	2	1	1	0	0	0	-1	0	0	1	0
NM_145263	SPATA18	2	1	1	0	0	0	0	1	0	-1	0
NM_003120	SPI1	2	1	1	0	0	0	0	1	0	-1	0
NM_003122	SPINK1	2	1	1	0	0	0	0	-1	1	0	0
NM_001097589	SPRR3	2	1	1	0	0	0	-1	0	0	1	0
NM_001037175	SUSD4	2	1	1	0	0	0	0	-1	0	1	0
NM_001135806	SYT1	2	1	1	0	0	0	1	-1	0	0	0
NM_001256508	TBC1D10C	2	1	1	0	0	0	0	1	0	-1	0
NM_030984	TBXAS1	2	1	1	0	0	0	0	1	0	-1	0
NM_001174136	TDGF1	2	1	1	0	0	1	0	-1	0	0	0
NM_014553	TFCP2L1	2	1	1	0	0	0	0	-1	0	0	1
NM_003245	TGM3	2	1	1	0	0	0	-1	0	0	1	0
NM_004245	TGM5	2	1	1	0	0	0	-1	0	0	1	0
NM_012109	TMEM59L	2	1	1	0	0	-1	0	0	1	0	0
NM_032404	TMPRSS3	2	1	1	0	0	1	0	0	0	-1	0
NM_001114981	TP63	2	1	1	0	-1	0	0	0	0	1	0
NM_145068	TRPV3	2	1	1	0	0	-1	1	0	0	0	0
NM_001173515	TYROBP	2	1	1	0	0	0	0	1	0	-1	0
NM_001145161	UBE2QL1	2	1	1	0	0	-1	0	0	0	1	0
NM_205862	UGT1A6	2	1	1	0	0	-1	0	0	0	1	0
NM_013378	VPREB3	2	1	1	0	0	-1	0	0	1	0	0
NM_001253850	VTCN1	2	1	1	0	0	0	0	-1	0	1	0
NM_001272046	VWA2	2	1	1	0	0	1	0	-1	0	0	0
NM_020945	WDFY4	2	1	1	0	0	0	0	1	0	-1	0
NM_000014	A2M	2	0	2	-1	0	0	0	0	0	-1	0
NM_001086	AADAC	2	0	2	0	-1	0	0	0	-1	0	0
NM_001089	ABCA3	2	0	2	0	0	0	0	0	-1	-1	0
NM_001142807	ACOXL	2	0	2	0	0	0	0	0	-1	-1	0
NM_001613	ACTA2	2	0	2	-1	0	0	0	0	0	0	-1
NM_001103	ACTN2	2	0	2	-1	0	0	0	0	0	-1	0
NM_001077401	ACVRL1	2	0	2	0	0	0	0	0	-1	-1	0
NM_139055	ADAMTS15	2	0	2	-1	0	0	0	-1	0	0	0
NM_139247	ADCY4	2	0	2	0	-1	0	0	0	0	-1	0
NM_001115	ADCY8	2	0	2	0	0	0	0	0	-1	0	-1
NM_001199637	ADCYAP1R1	2	0	2	0	-1	-1	0	0	0	0	0
NM_001206932	AGER	2	0	2	0	0	0	0	0	-1	-1	0
NM_001256421	AGPAT9	2	0	2	0	0	-1	0	-1	0	0	0
NM_001138	AGRP	2	0	2	0	0	0	0	0	-1	-1	0
NM_001130723	AHCYL2	2	0	2	0	0	-1	0	0	0	-1	0
NM_001185096	AIF1L	2	0	2	0	0	0	-1	-1	0	0	0
NM_152327	AK7	2	0	2	0	0	0	0	0	-1	-1	0
NM_004274	AKAP6	2	0	2	-1	0	-1	0	0	0	0	0
NM_000477	ALB	2	0	2	0	-1	0	0	-1	0	0	0
NM_001204889	ALDH2	2	0	2	-1	0	0	0	0	0	-1	0
NM_001140	ALOX15	2	0	2	0	0	0	0	0	-1	-1	0
NM_001629	ALOX5AP	2	0	2	0	0	0	0	0	-1	-1	0
NM_130847	AMOTL1	2	0	2	0	0	-1	0	0	0	0	-1
NM_015985	ANGPT4	2	0	2	0	0	0	0	0	-1	-1	0
NM_014391	ANKRD1	2	0	2	0	0	0	0	0	-1	-1	0
NM_001162435	ANKRD66	2	0	2	0	0	0	0	0	-1	-1	0
NM_001286780	ANTXR2	2	0	2	-1	0	0	0	0	0	0	-1
NM_001193544	ANXA6	2	0	2	-1	0	0	0	0	0	0	-1
NM_001630	ANXA8L2	2	0	2	0	-1	0	0	0	-1	0	0
NM_003568	ANXA9	2	0	2	0	0	0	-1	-1	0	0	0
NM_153360	APCDD1L	2	0	2	0	-1	0	0	-1	0	0	0
NM_000042	APOH	2	0	2	0	0	0	0	0	-1	-1	0
NM_145640	APOL3	2	0	2	0	0	0	0	0	0	-1	-1
NM_030817	APOLD1	2	0	2	-1	0	0	0	0	0	0	-1
NM_004925	AQP3	2	0	2	0	0	0	-1	-1	0	0	0
NM_004028	AQP4	2	0	2	0	0	0	0	0	-1	-1	0
NM_020754	ARHGAP31	2	0	2	0	0	0	0	0	-1	-1	0
NM_025014	ARHGEF15	2	0	2	0	0	0	0	0	-1	-1	0
NM_001111270	ARHGEF25	2	0	2	0	0	-1	0	0	0	0	-1
NM_001251963	ARHGEF26	2	0	2	0	0	0	0	0	-1	-1	0
NM_001242729	ARHGEF38	2	0	2	0	0	0	0	-1	0	-1	0
NM_015320	ARHGEF4	2	0	2	0	-1	-1	0	0	0	0	0
NM_001661	ARL4D	2	0	2	0	0	-1	0	-1	0	0	0
NM_001290021	ARMC4	2	0	2	0	0	0	0	0	-1	-1	0
NM_021071	ART4	2	0	2	0	0	0	0	0	-1	-1	0
NM_080874	ASB5	2	0	2	-1	0	-1	0	0	0	0	0
NM_001080464	ASPG	2	0	2	0	0	-1	0	0	-1	0	0
NM_014861	ATP2C2	2	0	2	0	0	0	0	-1	0	-1	0
NM_130840	ATP6V0A4	2	0	2	0	0	0	-1	-1	0	0	0
NM_000706	AVPR1A	2	0	2	0	0	0	0	-1	0	0	-1
NM_144696	AXDND1	2	0	2	0	0	-1	0	-1	0	0	0
NM_145236	B3GNT7	2	0	2	0	0	-1	0	0	0	-1	0
NM_001159387	B4GALNT2	2	0	2	0	0	-1	0	-1	0	0	0
NM_024812	BAALC	2	0	2	0	0	-1	0	0	-1	0	0
NM_001704	BAI3	2	0	2	-1	0	0	0	0	0	0	-1
NM_000710	BDKRB1	2	0	2	-1	0	0	0	-1	0	0	0
NM_000623	BDKRB2	2	0	2	-1	0	0	0	-1	0	0	0
NM_001143808	BDNF	2	0	2	-1	0	0	0	0	-1	0	0
NM_001200	BMP2	2	0	2	0	-1	0	0	0	0	-1	0
NM_033197	BPIFB1	2	0	2	0	0	0	-1	0	0	-1	0
NM_199051	BRINP3	2	0	2	0	0	-1	0	-1	0	0	0
NM_017688	BSPRY	2	0	2	0	0	0	-1	-1	0	0	0
NM_001729	BTC	2	0	2	0	0	0	-1	-1	0	0	0
NM_001159707	BTNL8	2	0	2	0	0	-1	0	0	0	-1	0
NM_007073	BVES	2	0	2	-1	0	-1	0	0	0	0	0
NM_173554	C10orf107	2	0	2	0	0	0	0	0	-1	-1	0
NM_001288741	C10orf128	2	0	2	0	-1	0	0	0	0	-1	0
NM_153714	C10orf67	2	0	2	0	0	0	0	0	-1	-1	0
NM_001142946	C11orf21	2	0	2	0	0	0	0	0	-1	-1	0
NM_001100388	C11orf88	2	0	2	0	0	0	0	0	-1	-1	0
NM_001190462	C11orf97	2	0	2	0	0	0	0	0	-1	-1	0
NM_173528	C15orf26	2	0	2	0	0	0	0	0	-1	-1	0
NM_174918	C19orf59	2	0	2	0	0	0	0	0	-1	-1	0
NM_031908	C1QTNF2	2	0	2	-1	0	0	0	0	0	-1	0
NM_001083924	C1orf116	2	0	2	0	0	0	0	-1	0	-1	0
NM_152290	C1orf158	2	0	2	0	0	0	0	0	-1	-1	0
NM_001002912	C1orf173	2	0	2	0	0	0	0	0	-1	-1	0
NM_001010979	C1orf189	2	0	2	0	0	0	0	0	-1	-1	0
NM_001122961	C1orf194	2	0	2	0	0	0	0	0	-1	-1	0
NM_152377	C1orf87	2	0	2	0	0	0	0	0	-1	-1	0
NM_178456	C20orf85	2	0	2	0	0	0	0	0	-1	-1	0
NM_001007595	C2CD4B	2	0	2	-1	0	0	0	0	0	-1	0
NM_001143960	C2orf74	2	0	2	0	0	-1	0	0	0	0	-1
NM_001025266	C3orf70	2	0	2	-1	0	0	0	0	0	0	-1
NM_152770	C4orf22	2	0	2	0	0	0	0	0	-1	-1	0
NM_178569	C5orf38	2	0	2	0	0	0	0	-1	-1	0	0
NM_001089584	C5orf49	2	0	2	0	0	0	0	0	-1	-1	0
NM_144980	C6orf118	2	0	2	0	0	0	0	0	-1	-1	0
NM_001031743	C6orf165	2	0	2	0	0	0	0	0	-1	-1	0
NM_000066	C8B	2	0	2	0	0	0	0	0	-1	-1	0
NM_052958	C8orf34	2	0	2	0	0	0	0	0	-1	-1	0
NM_020130	C8orf4	2	0	2	0	0	0	0	-1	0	-1	0
NM_001012993	C9orf152	2	0	2	0	0	0	-1	0	0	-1	0
NM_001282957	C9orf171	2	0	2	0	0	0	0	0	-1	-1	0
NM_000067	CA2	2	0	2	0	0	-1	0	0	-1	0	0
NM_004056	CA8	2	0	2	0	0	0	0	-1	0	-1	0
NM_001005407	CACNA1H	2	0	2	-1	0	0	0	0	0	0	-1
NM_201593	CACNB2	2	0	2	-1	0	-1	0	0	0	0	0
NM_001145798	CACNB4	2	0	2	-1	0	0	0	0	-1	0	0
NM_014405	CACNG4	2	0	2	0	0	0	0	0	-1	-1	0
NM_031897	CACNG6	2	0	2	0	0	0	0	0	-1	-1	0
NM_007088	CALB2	2	0	2	0	-1	-1	0	0	0	0	0
NM_001271751	CALCRL	2	0	2	0	0	0	0	0	-1	-1	0
NM_171825	CAMK2A	2	0	2	-1	0	0	0	0	0	0	-1
NM_004345	CAMP	2	0	2	0	0	0	0	0	-1	-1	0
NM_012298	CAND2	2	0	2	0	0	-1	0	-1	0	0	0
NM_080590	CAPS	2	0	2	0	0	0	0	-1	0	-1	0
NM_001042625	CAPSL	2	0	2	0	0	0	0	0	-1	-1	0
NM_001136110	CASP5	2	0	2	0	0	-1	0	0	0	-1	0
NM_001752	CAT	2	0	2	0	0	0	0	0	-1	-1	0
NM_198559	CATIP	2	0	2	0	0	0	0	0	-1	-1	0
NM_182511	CBLN2	2	0	2	0	0	-1	0	-1	0	0	0
NM_175709	CBX7	2	0	2	-1	0	0	0	0	0	0	-1
NM_194302	CCDC108	2	0	2	0	0	0	0	0	-1	-1	0
NM_001289163	CCDC135	2	0	2	0	0	0	0	0	-1	-1	0
NM_173648	CCDC141	2	0	2	0	0	0	0	0	-1	-1	0
NM_001190182	CCDC17	2	0	2	0	0	0	0	0	-1	-1	0
NM_001085447	CCDC173	2	0	2	0	0	0	0	0	-1	-1	0
NM_031455	CCDC3	2	0	2	0	-1	0	0	0	0	0	-1
NM_001287181	CCDC33	2	0	2	0	0	0	0	0	-1	-1	0
NM_182628	CCDC37	2	0	2	0	0	0	0	0	-1	-1	0
NM_001286957	CCDC65	2	0	2	0	0	0	0	0	-1	-1	0
NM_001143829	CCDC68	2	0	2	0	0	-1	0	0	0	-1	0
NM_032040	CCDC8	2	0	2	0	-1	0	0	-1	0	0	0
NM_021827	CCDC81	2	0	2	0	0	0	0	0	-1	0	-1
NM_005408	CCL13	2	0	2	0	-1	-1	0	0	0	0	0
NM_032965	CCL15	2	0	2	0	0	0	0	0	-1	-1	0
NM_006274	CCL19	2	0	2	0	0	-1	-1	0	0	0	0
NM_148672	CCL28	2	0	2	0	-1	-1	0	0	0	0	0
NM_080625	CCM2L	2	0	2	0	0	0	0	0	-1	-1	0
NM_001759	CCND2	2	0	2	-1	0	0	0	0	0	0	-1
NM_001256111	CD101	2	0	2	0	0	0	0	0	-1	-1	0
NM_001765	CD1C	2	0	2	0	0	-1	0	0	0	-1	0
NM_001185110	CD1E	2	0	2	0	0	0	-1	0	0	-1	0
NM_001025109	CD34	2	0	2	-1	0	0	0	0	0	-1	0
NM_021602	CD79B	2	0	2	-1	0	-1	0	0	0	0	0
NM_021153	CDH19	2	0	2	-1	0	-1	0	0	0	0	0
NM_001795	CDH5	2	0	2	0	0	0	0	0	-1	-1	0
NM_152750	CDHR3	2	0	2	0	0	0	0	0	-1	-1	0
NM_001007540	CDHR4	2	0	2	0	0	0	0	0	-1	-1	0
NM_006890	CEACAM7	2	0	2	0	0	-1	-1	0	0	0	0
NM_001185177	CES3	2	0	2	0	0	-1	-1	0	0	0	0
NM_001243645	CFL2	2	0	2	-1	0	-1	0	0	0	0	0
NM_020770	CGN	2	0	2	0	0	0	0	-1	0	-1	0
NM_003956	CH25H	2	0	2	-1	0	0	0	0	0	-1	0
NM_018397	CHDH	2	0	2	0	0	0	-1	0	0	-1	0
NM_001258002	CHIA	2	0	2	0	0	0	0	0	-1	-1	0
NM_001006629	CHRM2	2	0	2	-1	0	-1	0	0	0	0	0
NM_001279	CIDEA	2	0	2	0	-1	0	-1	0	0	0	0
NM_006079	CITED2	2	0	2	0	0	0	0	0	0	-1	-1
NM_016369	CLDN18	2	0	2	0	0	0	0	0	-1	-1	0
NM_001185117	CLDN19	2	0	2	0	-1	0	0	-1	0	0	0
NM_175060	CLEC14A	2	0	2	0	0	0	0	0	-1	-1	0
NM_016511	CLEC1A	2	0	2	0	0	0	0	0	-1	-1	0
NM_001144911	CLEC4M	2	0	2	0	0	0	0	0	-1	-1	0
NM_001287527	CLIP4	2	0	2	0	-1	-1	0	0	0	0	0
NM_000087	CNGA1	2	0	2	0	-1	0	0	-1	0	0	0
NM_001037329	CNGA4	2	0	2	0	0	0	0	0	-1	-1	0
NM_001289081	CNTN6	2	0	2	0	0	0	0	0	-1	-1	0
NM_033655	CNTNAP3	2	0	2	0	-1	-1	0	0	0	0	0
NM_001201380	CNTNAP3B	2	0	2	0	-1	-1	0	0	0	0	0
NM_015198	COBL	2	0	2	0	0	0	-1	0	0	-1	0
NM_006438	COLEC10	2	0	2	0	0	0	0	0	-1	-1	0
NM_015101	COLGALT2	2	0	2	-1	0	0	0	0	-1	0	0
NM_032609	COX4I2	2	0	2	0	0	0	0	0	-1	-1	0
NM_001278541	CPB2	2	0	2	0	0	0	0	0	-1	-1	0
NM_001005502	CPM	2	0	2	0	0	-1	0	0	0	-1	0
NM_006032	CPNE6	2	0	2	-1	0	0	0	-1	0	0	0
NM_173689	CRB2	2	0	2	0	0	0	0	-1	0	0	-1
NM_001011666	CREB5	2	0	2	-1	-1	0	0	0	0	0	0
NM_001882	CRHBP	2	0	2	0	-1	0	0	-1	0	0	0
NM_001142407	CRISP2	2	0	2	0	0	0	-1	0	0	0	-1
NM_001288716	CTNND2	2	0	2	0	0	0	0	0	-1	-1	0
NM_033427	CTTNBP2	2	0	2	0	-1	0	-1	0	0	0	0
NM_002996	CX3CL1	2	0	2	-1	-1	0	0	0	0	0	0
NM_198477	CXCL17	2	0	2	0	0	0	-1	0	0	-1	0
NM_000634	CXCR1	2	0	2	0	0	0	0	0	-1	-1	0
NM_001037333	CYFIP2	2	0	2	0	0	0	0	-1	0	-1	0
NM_000781	CYP11A1	2	0	2	0	-1	0	-1	0	0	0	0
NM_023944	CYP4F12	2	0	2	0	-1	0	-1	0	0	0	0
NM_001286350	DACT2	2	0	2	0	-1	0	0	-1	0	0	0
NM_014326	DAPK2	2	0	2	0	0	0	0	0	-1	-1	0
NM_001195610	DCDC2	2	0	2	0	0	0	0	0	-1	-1	0
NM_001257317	DCSTAMP	2	0	2	0	0	0	0	0	-1	-1	0
NM_006182	DDR2	2	0	2	0	0	-1	0	0	0	0	-1
NM_005217	DEFA3	2	0	2	0	0	0	0	0	-1	-1	0
NM_014957	DENND3	2	0	2	0	0	0	0	0	-1	-1	0
NM_004675	DIRAS3	2	0	2	0	0	0	0	-1	0	-1	0
NM_033425	DIXDC1	2	0	2	-1	0	0	0	0	0	0	-1
NM_001164271	DLC1	2	0	2	0	0	0	0	0	-1	-1	0
NM_001142702	DLG2	2	0	2	0	0	0	-1	-1	0	0	0
NM_003836	DLK1	2	0	2	0	-1	0	-1	0	0	0	0
NM_004662	DNAH9	2	0	2	0	0	0	0	0	-1	-1	0
NM_012144	DNAI1	2	0	2	0	0	0	0	0	-1	-1	0
NM_001172810	DNAI2	2	0	2	0	0	0	0	0	-1	-1	0
NM_012266	DNAJB5	2	0	2	-1	0	-1	0	0	0	0	0
NM_058248	DNASE2B	2	0	2	0	0	0	0	0	-1	-1	0
NM_139072	DNER	2	0	2	0	0	-1	0	-1	0	0	0
NM_080870	DPCR1	2	0	2	0	0	0	0	0	-1	-1	0
NM_001935	DPP4	2	0	2	0	0	0	0	0	0	-1	-1
NM_173812	DPY19L2	2	0	2	-1	-1	0	0	0	0	0	0
NM_000110	DPYD	2	0	2	0	0	-1	0	0	0	0	-1
NM_145038	DRC1	2	0	2	0	0	0	0	0	-1	-1	0
NM_001136536	DTHD1	2	0	2	0	0	0	0	0	-1	-1	0
NM_004416	DTX1	2	0	2	0	-1	0	0	-1	0	0	0
NM_175940	DUOX1	2	0	2	0	0	0	0	0	-1	-1	0
NM_024025	DUSP26	2	0	2	0	0	0	0	-1	0	-1	0
NM_001270041	DYDC2	2	0	2	0	0	0	0	0	-1	-1	0
NM_130897	DYNLRB2	2	0	2	0	0	0	0	0	-1	-1	0
NM_182708	EBF1	2	0	2	-1	-1	0	0	0	0	0	0
NM_001005463	EBF3	2	0	2	-1	-1	0	0	0	0	0	0
NM_001077693	ECSCR	2	0	2	0	0	0	0	0	-1	-1	0
NM_024593	EFCAB1	2	0	2	0	-1	0	0	0	-1	0	0
NM_207307	EFCAB12	2	0	2	0	0	0	0	0	-1	-1	0
NM_144715	EFHB	2	0	2	0	0	0	0	0	-1	-1	0
NM_001136177	EGR2	2	0	2	0	-1	0	0	0	0	0	-1
NM_001199881	EGR3	2	0	2	-1	-1	0	0	0	0	0	0
NM_001206615	EHF	2	0	2	0	0	0	-1	-1	0	0	0
NM_001278918	ELN	2	0	2	-1	0	0	0	0	0	-1	0
NM_001423	EMP1	2	0	2	-1	0	0	-1	0	0	0	0
NM_001424	EMP2	2	0	2	0	0	0	0	0	-1	-1	0
NM_001289159	EMR3	2	0	2	0	0	0	0	0	-1	-1	0
NM_001040092	ENPP2	2	0	2	-1	-1	0	0	0	0	0	0
NM_014936	ENPP4	2	0	2	0	0	0	-1	0	0	-1	0
NM_001430	EPAS1	2	0	2	0	0	0	0	0	-1	-1	0
NM_001281535	EPB41L3	2	0	2	0	0	-1	0	0	0	0	-1
NM_001288629	EPHA7	2	0	2	-1	0	-1	0	0	0	0	0
NM_001280795	EPHB6	2	0	2	0	-1	0	0	0	0	0	-1
NM_001256484	EPHX2	2	0	2	-1	0	0	-1	0	0	0	0
NM_001136155	ERG	2	0	2	0	0	0	0	0	-1	-1	0
NM_152321	ERP27	2	0	2	0	0	0	0	-1	0	-1	0
NM_138961	ESAM	2	0	2	0	0	0	0	0	-1	-1	0
NM_001243511	ESRRG	2	0	2	0	0	0	-1	-1	0	0	0
NM_001286556	EVA1C	2	0	2	-1	0	0	0	0	0	0	-1
NM_172103	EYA4	2	0	2	0	0	0	0	-1	-1	0	0
NM_000129	F13A1	2	0	2	-1	0	-1	0	0	0	0	0
NM_001178096	F3	2	0	2	0	-1	0	0	-1	0	0	0
NM_001443	FABP1	2	0	2	0	0	-1	0	-1	0	0	0
NM_052966	FAM129A	2	0	2	-1	0	-1	0	0	0	0	0
NM_001008226	FAM154B	2	0	2	0	0	0	0	0	-1	-1	0
NM_199280	FAM179A	2	0	2	0	0	0	0	0	-1	-1	0
NM_205855	FAM180A	2	0	2	-1	0	0	0	-1	0	0	0
NM_001164379	FAM180B	2	0	2	-1	-1	0	0	0	0	0	0
NM_001207074	FAM181A	2	0	2	0	0	0	0	0	-1	-1	0
NM_182508	FAM216B	2	0	2	0	0	0	0	0	-1	-1	0
NM_001286445	FAM65B	2	0	2	0	0	0	0	0	0	-1	-1
NM_152548	FAM81B	2	0	2	0	0	0	0	0	-1	-1	0
NM_198491	FAM92B	2	0	2	0	0	0	0	0	-1	-1	0
NM_024582	FAT4	2	0	2	-1	0	0	0	0	0	-1	0
NM_001127628	FBP1	2	0	2	0	0	0	0	-1	0	-1	0
NM_001278317	FBXL7	2	0	2	-1	0	0	0	0	0	0	-1
NM_148177	FBXO32	2	0	2	0	0	-1	0	0	0	0	-1
NM_001207019	FCER2	2	0	2	-1	0	-1	0	0	0	0	0
NM_173452	FCN3	2	0	2	0	0	0	0	0	-1	-1	0
NM_001039112	FER1L6	2	0	2	0	0	-1	0	-1	0	0	0
NM_001195755	FFAR4	2	0	2	0	0	0	0	0	-1	-1	0
NM_152536	FGD5	2	0	2	0	0	0	0	0	-1	-1	0
NM_033137	FGF1	2	0	2	0	-1	0	0	-1	0	0	0
NM_001144914	FGFR2	2	0	2	0	0	-1	0	0	-1	0	0
NM_022963	FGFR4	2	0	2	0	0	0	0	0	-1	-1	0
NM_005248	FGR	2	0	2	0	0	0	0	0	-1	-1	0
NM_001282793	FILIP1L	2	0	2	-1	0	0	0	0	0	0	-1
NM_020066	FMN2	2	0	2	0	0	-1	0	-1	0	0	0
NM_015033	FNBP1	2	0	2	-1	0	0	0	0	0	0	-1
NM_001171940	FNDC5	2	0	2	0	0	0	-1	-1	0	0	0
NM_144769	FOXI1	2	0	2	0	0	0	-1	-1	0	0	0
NM_001454	FOXJ1	2	0	2	0	0	0	0	-1	0	-1	0
NM_001005738	FPR2	2	0	2	0	0	0	0	0	-1	-1	0
NM_024919	FRMD1	2	0	2	0	-1	0	0	-1	0	0	0
NM_023037	FRY	2	0	2	0	0	0	0	0	0	-1	-1
NM_012296	GAB2	2	0	2	0	0	0	0	0	0	-1	-1
NM_000807	GABRA2	2	0	2	0	0	-1	0	-1	0	0	0
NM_001191320	GABRB3	2	0	2	0	0	-1	0	0	0	0	-1
NM_001286779	GARNL3	2	0	2	-1	0	0	0	0	0	0	-1
NM_139285	GAS2L2	2	0	2	0	0	0	0	0	-1	-1	0
NM_000820	GAS6	2	0	2	-1	0	0	0	0	0	0	-1
NM_003644	GAS7	2	0	2	-1	0	0	-1	0	0	0	0
NM_024307	GDPD3	2	0	2	0	0	-1	-1	0	0	0	0
NM_178312	GGTLC1	2	0	2	0	0	0	0	0	-1	-1	0
NM_018384	GIMAP5	2	0	2	-1	0	0	0	0	0	-1	0
NM_001244071	GIMAP6	2	0	2	0	0	0	0	0	-1	-1	0
NM_175571	GIMAP8	2	0	2	0	0	0	0	0	-1	-1	0
NM_020435	GJC2	2	0	2	-1	0	0	0	0	0	-1	0
NM_182536	GKN2	2	0	2	0	0	0	0	0	-1	-1	0
NM_000168	GLI3	2	0	2	0	0	-1	0	0	0	0	-1
NM_004246	GLP2R	2	0	2	-1	0	-1	0	0	0	0	0
NM_006877	GMPR	2	0	2	0	0	0	0	-1	0	-1	0
NM_001007242	GP2	2	0	2	0	0	-1	0	-1	0	0	0
NM_015141	GPD1L	2	0	2	0	0	0	-1	0	0	-1	0
NM_153840	GPR110	2	0	2	0	0	0	-1	-1	0	0	0
NM_032777	GPR124	2	0	2	-1	0	0	0	0	0	0	-1
NM_014696	GPRIN2	2	0	2	0	0	0	0	0	-1	-1	0
NM_005309	GPT	2	0	2	0	0	-1	-1	0	0	0	0
NM_001012642	GRAMD2	2	0	2	0	0	0	0	0	-1	-1	0
NM_001258023	GRIA1	2	0	2	0	0	0	0	0	-1	-1	0
NM_005308	GRK5	2	0	2	0	0	0	0	0	-1	-1	0
NM_198682	GYPE	2	0	2	0	0	0	0	0	-1	-1	0
NM_000519	HBD	2	0	2	0	0	0	0	0	-1	-1	0
NM_001945	HBEGF	2	0	2	-1	0	0	0	0	-1	0	0
NM_177551	HCAR2	2	0	2	0	-1	0	0	0	-1	0	0
NM_002112	HDC	2	0	2	-1	0	0	0	0	0	-1	0
NM_001010932	HGF	2	0	2	-1	0	0	0	0	0	-1	0
NM_022475	HHIP	2	0	2	0	0	0	0	0	-1	-1	0
NM_139211	HOPX	2	0	2	0	0	0	-1	0	0	-1	0
NM_019102	HOXA5	2	0	2	0	-1	0	0	0	0	-1	0
NM_006898	HOXD3	2	0	2	0	0	0	0	-1	0	0	-1
NM_001126102	HP	2	0	2	0	0	0	-1	0	0	-1	0
NM_002150	HPD	2	0	2	-1	0	0	0	-1	0	0	0
NM_181755	HSD11B1	2	0	2	0	-1	0	0	-1	0	0	0
NM_000196	HSD11B2	2	0	2	0	0	-1	0	-1	0	0	0
NM_002153	HSD17B2	2	0	2	0	-1	-1	0	0	0	0	0
NM_001197327	HSPA12B	2	0	2	0	0	0	0	0	-1	-1	0
NM_130770	HTR3C	2	0	2	0	0	0	0	0	-1	-1	0
NM_004970	IGFALS	2	0	2	0	0	0	0	0	-1	-1	0
NM_001277285	IGSF9B	2	0	2	-1	0	0	0	0	0	0	-1
NM_002181	IHH	2	0	2	0	0	0	0	0	-1	-1	0
NM_001172771	IL34	2	0	2	-1	0	0	-1	0	0	0	0
NM_001243099	IL5RA	2	0	2	0	0	0	0	0	-1	-1	0
NM_002207	ITGA9	2	0	2	-1	0	0	0	0	0	-1	0
NM_001205329	JAM3	2	0	2	-1	0	0	0	0	0	0	-1
NM_198471	KANK3	2	0	2	0	0	0	0	0	-1	-1	0
NM_172198	KCND3	2	0	2	-1	0	0	0	0	0	0	-1
NM_080671	KCNE4	2	0	2	-1	0	0	0	0	0	0	-1
NM_001034914	KCNIP3	2	0	2	-1	0	-1	0	0	0	0	0
NM_000890	KCNJ5	2	0	2	0	0	0	0	0	-1	-1	0
NM_004982	KCNJ8	2	0	2	0	0	0	0	0	0	-1	-1
NM_031460	KCNK17	2	0	2	0	0	0	0	0	-1	-1	0
NM_001278911	KCNMB2	2	0	2	0	0	0	0	-1	0	0	-1
NM_170782	KCNN3	2	0	2	-1	0	-1	0	0	0	0	0
NM_181798	KCNQ1	2	0	2	0	0	0	0	-1	0	-1	0
NM_001287819	KCNT2	2	0	2	0	0	0	0	0	-1	-1	0
NM_152688	KHDRBS2	2	0	2	0	0	0	0	0	-1	-1	0
NM_020848	KIAA1462	2	0	2	0	0	0	0	0	0	-1	-1
NM_001122819	KIF17	2	0	2	0	0	0	0	0	-1	-1	0
NM_015656	KIF26A	2	0	2	-1	0	0	0	0	0	0	-1
NM_152375	KLHDC7A	2	0	2	0	0	0	-1	0	0	-1	0
NM_152643	KNDC1	2	0	2	0	0	0	0	0	0	-1	-1
NM_019016	KRT24	2	0	2	-1	0	-1	0	0	0	0	0
NM_006059	LAMC3	2	0	2	-1	0	0	0	0	0	-1	0
NM_014398	LAMP3	2	0	2	0	0	0	0	0	-1	-1	0
NM_001001712	LCN10	2	0	2	-1	0	0	0	0	0	0	-1
NM_005564	LCN2	2	0	2	0	0	0	-1	-1	0	0	0
NM_001276392	LDLRAD1	2	0	2	0	0	0	0	0	-1	-1	0
NM_001172425	LEFTY2	2	0	2	0	0	0	0	0	-1	-1	0
NM_001134418	LEPREL1	2	0	2	0	0	-1	0	0	-1	0	0
NM_006498	LGALS2	2	0	2	0	0	-1	0	0	0	-1	0
NM_139278	LGI3	2	0	2	0	0	0	0	0	-1	-1	0
NM_001017404	LGR6	2	0	2	0	-1	0	-1	0	0	0	0
NM_199000	LHFPL3	2	0	2	0	0	0	0	0	-1	-1	0
NM_181985	LILRA5	2	0	2	0	0	0	0	0	-1	-1	0
NM_004664	LIN7A	2	0	2	0	0	0	0	0	-1	-1	0
NM_139248	LIPH	2	0	2	0	0	0	0	-1	0	-1	0
NM_001278795	LOC100996758	2	0	2	0	0	-1	0	0	0	-1	0
NM_015236	LPHN3	2	0	2	0	-1	-1	0	0	0	0	0
NM_001080457	LRRC4B	2	0	2	0	0	0	0	0	0	-1	-1
NM_144702	LRRC71	2	0	2	0	0	0	0	0	-1	-1	0
NM_201630	LRRN2	2	0	2	0	0	-1	0	-1	0	0	0
NM_145867	LTC4S	2	0	2	-1	0	0	0	0	0	-1	0
NM_001199149	LTF	2	0	2	0	0	0	-1	-1	0	0	0
NM_001135685	LTK	2	0	2	0	0	-1	0	0	0	-1	0
NM_012301	MAGI2	2	0	2	-1	0	0	0	0	0	0	-1
NM_002373	MAP1A	2	0	2	-1	0	0	0	0	0	0	-1
NM_001004343	MAP1LC3C	2	0	2	0	-1	0	0	0	0	-1	0
NM_001018047	MAP3K19	2	0	2	0	0	0	0	0	-1	-1	0
NM_016841	MAPT	2	0	2	0	0	-1	-1	0	0	0	0
NM_001040002	MEOX1	2	0	2	-1	-1	0	0	0	0	0	0
NM_001123364	METTL24	2	0	2	-1	0	-1	0	0	0	0	0
NM_003480	MFAP5	2	0	2	-1	0	-1	0	0	0	0	0
NM_001287808	MFSD2A	2	0	2	0	0	0	0	0	-1	-1	0
NM_152599	MFSD6L	2	0	2	0	0	0	-1	-1	0	0	0
NM_181723	MICU3	2	0	2	-1	-1	0	0	0	0	0	0
NM_007287	MME	2	0	2	0	-1	0	0	0	-1	0	0
NM_001278376	MPP2	2	0	2	0	0	-1	0	-1	0	0	0
NM_138409	MRAP2	2	0	2	0	-1	0	0	-1	0	0	0
NM_001100167	MRVI1	2	0	2	-1	0	0	0	0	0	0	-1
NM_005949	MT1F	2	0	2	0	0	-1	0	-1	0	0	0
NM_005951	MT1H	2	0	2	0	0	-1	0	-1	0	0	0
NM_005952	MT1X	2	0	2	0	-1	-1	0	0	0	0	0
NM_001282506	MUC20	2	0	2	0	0	0	-1	-1	0	0	0
NM_025107	MYCT1	2	0	2	0	0	0	0	0	-1	-1	0
NM_000258	MYL3	2	0	2	0	0	0	0	-1	0	-1	0
NM_001135940	MYOT	2	0	2	-1	0	-1	0	0	0	0	0
NM_001284423	MYRIP	2	0	2	0	0	0	-1	0	0	-1	0
NM_001146334	NACAD	2	0	2	0	0	-1	0	0	0	0	-1
NM_144653	NACC2	2	0	2	-1	0	0	0	0	0	0	-1
NM_178557	NAT8L	2	0	2	0	-1	0	0	-1	0	0	0
NM_001040627	NCALD	2	0	2	-1	-1	0	0	0	0	0	0
NM_207363	NCKAP5	2	0	2	0	0	0	0	0	-1	-1	0
NM_002487	NDN	2	0	2	0	0	-1	0	0	0	0	-1
NM_001282211	NDRG2	2	0	2	0	-1	0	-1	0	0	0	0
NM_005382	NEFM	2	0	2	0	0	-1	0	-1	0	0	0
NM_001167600	NEU4	2	0	2	0	0	-1	0	-1	0	0	0
NM_176677	NHLRC4	2	0	2	0	0	0	0	-1	0	-1	0
NM_153361	NIM1K	2	0	2	0	0	0	0	0	-1	-1	0
NM_001007531	NKAPL	2	0	2	-1	-1	0	0	0	0	0	0
NM_145285	NKX2_3	2	0	2	0	0	-1	-1	0	0	0	0
NM_003551	NME5	2	0	2	-1	0	0	0	0	0	-1	0
NM_052946	NOSTRIN	2	0	2	0	0	0	0	0	-1	-1	0
NM_002516	NOVA2	2	0	2	0	0	0	0	0	-1	-1	0
NM_006174	NPY5R	2	0	2	0	-1	0	0	-1	0	0	0
NM_001018076	NR3C1	2	0	2	0	0	-1	0	0	0	0	-1
NM_001276464	NR5A2	2	0	2	0	0	-1	0	0	0	-1	0
NM_006176	NRGN	2	0	2	0	0	0	0	0	-1	-1	0
NM_001102654	NTF3	2	0	2	-1	0	0	-1	0	0	0	0
NM_004822	NTN1	2	0	2	0	0	-1	0	-1	0	0	0
NM_001205254	OCLN	2	0	2	0	0	0	0	-1	0	-1	0
NM_006418	OLFM4	2	0	2	0	-1	0	0	-1	0	0	0
NM_020190	OLFML3	2	0	2	-1	0	0	0	0	0	0	-1
NM_183378	OVCH1	2	0	2	0	0	0	0	0	-1	-1	0
NM_198185	OVCH2	2	0	2	0	-1	0	0	-1	0	0	0
NM_001145028	PALM3	2	0	2	0	0	0	0	-1	0	-1	0
NM_017734	PALMD	2	0	2	0	-1	0	0	0	-1	0	0
NM_001282676	PAMR1	2	0	2	-1	-1	0	0	0	0	0	0
NM_002581	PAPPA	2	0	2	0	0	0	0	-1	0	0	-1
NM_057177	PARD3B	2	0	2	-1	0	0	0	0	0	-1	0
NM_015393	PARM1	2	0	2	-1	0	0	0	0	0	-1	0
NM_001204963	PBX1	2	0	2	0	0	0	-1	0	0	0	-1
NM_022843	PCDH20	2	0	2	0	0	0	0	-1	0	-1	0
NM_032457	PCDH7	2	0	2	-1	0	0	0	-1	0	0	0
NM_001102566	PCP4L1	2	0	2	0	0	-1	-1	0	0	0	0
NM_001288769	PDE1B	2	0	2	0	0	0	0	0	0	-1	-1
NM_001098818	PDE4C	2	0	2	0	0	0	0	0	-1	-1	0
NM_013377	PDZRN4	2	0	2	-1	0	-1	0	0	0	0	0
NM_000442	PECAM1	2	0	2	0	0	0	0	0	-1	-1	0
NM_001289863	PER3	2	0	2	0	0	-1	0	0	0	0	-1
NM_002630	PGC	2	0	2	0	0	0	0	0	-1	-1	0
NM_001242648	PHACTR1	2	0	2	0	0	0	0	0	-1	-1	0
NM_181643	PIFO	2	0	2	0	0	0	-1	0	0	-1	0
NM_004570	PIK3C2G	2	0	2	0	-1	0	0	-1	0	0	0
NM_001193622	PINLYP	2	0	2	0	0	-1	0	-1	0	0	0
NM_032562	PLA2G12B	2	0	2	0	0	0	0	0	-1	-1	0
NM_000928	PLA2G1B	2	0	2	0	0	0	0	0	-1	-1	0
NM_033011	PLAT	2	0	2	0	0	0	0	-1	0	0	-1
NM_001130035	PLEKHB1	2	0	2	0	0	0	0	-1	0	-1	0
NM_000301	PLG	2	0	2	0	0	0	0	-1	0	0	-1
NM_015993	PLLP	2	0	2	0	0	0	0	0	-1	-1	0
NM_001177304	PLSCR4	2	0	2	-1	0	0	0	0	0	0	-1
NM_020911	PLXNA4	2	0	2	0	-1	0	0	-1	0	0	0
NM_153322	PMP22	2	0	2	-1	0	0	0	0	0	0	-1
NM_001199082	PODN	2	0	2	-1	0	0	0	0	0	0	-1
NM_000940	PON3	2	0	2	0	0	0	0	-1	0	-1	0
NM_022135	POPDC2	2	0	2	-1	0	-1	0	0	0	0	0
NM_002704	PPBP	2	0	2	0	0	0	0	0	-1	-1	0
NM_001172735	PPP1R16B	2	0	2	0	-1	0	0	0	0	-1	0
NM_001170753	PPP1R32	2	0	2	0	0	0	0	0	-1	-1	0
NM_001166161	PPP1R9A	2	0	2	0	0	0	-1	0	0	-1	0
[truncated: 2,267 more rows]

## Sheet: SuppTable4
Supplementary Table 4 | Expression levels of lncRNAs that are up-regulated in a single cancer type.
Transcript ID	Gene Symbol	DE Cancer	Avg Tumor FPKM
TCONS_00011854		CRC	34.94
ENST00000609300	LINC00261	UCEC	23.72
TCONS_00000759		LUSC	17.8
NR_004855	HULC	CRC	17.07
ENST00000528245	MIR210HG	KIRC	14.38
TCONS_l2_00009500		KIRC	12.87
TCONS_l2_00017583	DGCR5	KIRC	12.32
ENST00000423943	LINC01133	LUSC	12.24
TCONS_l2_00004762		KIRC	12.19
ENST00000429578	LINC00887	KIRC	10.07
uc002idi.1		KIRC	9.15
TCONS_00029630		HNSC	9.05
TCONS_00026823	TINCR	BRCA	8.24
uc021qoj.1		HNSC	8.2
TCONS_00012775		LUSC	7.54
TCONS_00005419	LINC00506	KIRC	6.76
TCONS_00009975	PART1	LUSC	6.73
TCONS_l2_00000146		LUAD	6.57
ENST00000552324		HNSC	6.5
ENST00000420819		LUSC	6.37
TCONS_00022099		LUSC	6.32
TCONS_00010005		LUAD	6.13
ENST00000419745		HNSC	5.8
TCONS_l2_00018982		HNSC	5.66
TCONS_00006384	LINC00885	LUSC	5.6
TCONS_00012368		HNSC	5.41
TCONS_00024663	CRNDE	CRC	5.36
ENST00000453988	LINC01160	HNSC	5.29
ENST00000505089		KIRC	5.27
TCONS_00000698		HNSC	5.17
TCONS_00013382		HNSC	4.99
TCONS_00029315	LINC00162	HNSC	4.98
uc021set.1		LUAD	4.87
TCONS_00019179		CRC	4.71
TCONS_l2_00009437		LUSC	4.6
TCONS_00016903		LUSC	4.16
TCONS_l2_00017190		LUSC	4.14
TCONS_00022004		KIRC	3.92
TCONS_00028769		KIRC	3.88
TCONS_00029211	LINC00649	LUSC	3.87
NR_033863		KIRC	3.69
TCONS_l2_00000031		LUAD	3.64
ENST00000521586	CARLo-2	CRC	3.61
ENST00000413290		CRC	3.59
TCONS_00020179		CRC	3.46
ENST00000564830		BRCA	3.42
TCONS_00019632		HNSC	3.38
ENST00000515485	LINC01207	LUAD	3.33
ENST00000514519		LUSC	3.25
TCONS_00018589		BLCA	3.22
TCONS_l2_00014536		CRC	3.22
ENST00000583942		HNSC	3.2
TCONS_00079056_HOTAIR	HOTAIR	BRCA	3.17
TCONS_l2_00029447		LUSC	2.87
ENST00000560238		HNSC	2.75
ENST00000422022		CRC	2.71
uc003jnb.1		KIRC	2.67
TCONS_00025525	MAFG-AS1	CRC	2.6
NR_109758		LUSC	2.6
TCONS_00025523		CRC	2.58
TCONS_l2_00020587	LINC01094	KIRC	2.51
TCONS_00009259		KIRC	2.44
ENST00000599803		HNSC	2.43
NR_026690	LINC00035	KIRC	2.42
NR_033851	SERPINB9P1	KIRC	2.39
TCONS_l2_00005286		HNSC	2.32
ENST00000417483	LINC01010	LUSC	2.31
TCONS_00028417		LUSC	2.24
uc001vmb.1	SOX21-AS1	LUSC	2.23
ENST00000434309		KIRC	2.17
NR_038464	LINC00857	LUAD	2.12
ENST00000589440		LUSC	2.02
ENST00000433510		HNSC	1.97
ENST00000428647		LUSC	1.97
TCONS_00029603		LUSC	1.97
TCONS_l2_00019878	TMCC1-AS1	KIRC	1.95
TCONS_l2_00025276		LUSC	1.94
NR_033878	LINC00944	KIRC	1.82
ENST00000589662		LUSC	1.82
TCONS_00011510		LUSC	1.8
NR_029405		KIRC	1.77
TCONS_l2_00029084		CRC	1.76
TCONS_00011229	LINC01628	KIRC	1.76
TCONS_00013025		LUSC	1.68
ENST00000538734	LINC00925	LUSC	1.65
uc003luf.3		LUSC	1.63
NR_026873	LINC00174	HNSC	1.62
TCONS_00003611		LUAD	1.61
TCONS_00000870		HNSC	1.57
TCONS_00022096	LINC01232	KIRC	1.55
TCONS_00012897	NMX1-AS1	BLCA	1.45
uc001mjn.1		KIRC	1.39
NR_110468	HOXD-AS1	HNSC	1.35
TCONS_00017736		HNSC	1.32
ENST00000490357		KIRC	1.31
TCONS_00000008	LINC00626	LUSC	1.31
TCONS_00001307		LUSC	1.24
ENST00000609382		LUSC	1.21
ENST00000595135	KC6	LUSC	1.18
ENST00000591384		HNSC	1.1
ENST00000507296		HNSC	1.1
ENST00000453784		KIRC	1.07
TCONS_00028187		LUSC	1.06
TCONS_00006773		LUSC	1.04
uc002wsk.1		KIRC	1
ENST00000417112		LUSC	1
TCONS_00019368		CRC	0.99
TCONS_00028427		LUSC	0.95
NR_110278		LUSC	0.93
NR_027123	KTN1-AS1	LUSC	0.86
TCONS_00016354		LUSC	0.82
TCONS_00023756		LUSC	0.81
ENST00000400831		CRC	0.75
TCONS_00008682		HNSC	0.69
uc002jit.1	LINC01152	KIRC	0.69
ENST00000591629	LINC00669	LUSC	0.68
uc003poi.2	TSG1	KIRC	0.57

## Sheet: SuppTable5
Supplementary Table 5 | Onco-lncRNAs. List of 229 lncRNAs altered across multiple cancer types. Onco-lncRNAs are ordered by the number of altered cancer types. For each cancer, 1 = up-regulated, 2 = up-regulated and outlier, 3 = outlier, -1 = down-regulated, -2 = down-regulated and outlier, 0 = not significant. The "LCAL" column identifies lung cancer associated lncRNAs that were identified by Wh…
onco-lncRNA ID	Transcript ID	Gene Symbol	LCAL ID	hg19 Coordinates	Total Altered	Total Up DE	Total Down DE	Outliers	BLCA	BRCA	CRC	HNSC	KIRC	LUAD	LUSC	UCEC
onco-lncRNA-1	uc011ara.2		LCAL3	chr22:46726771-46729595	5	5	0	0	1	1	0	0	0	1	1	1
onco-lncRNA-2	ENST00000553153	DUXAP10	LCAL10	chr14:19880595-19925346	5	5	0	0	1	0	1	1	1	0	1	0
onco-lncRNA-3	NR_033849	FAM83H-AS1	LCAL7	chr8:144816309-144828507	5	4	0	1	0	1	1	3	0	1	1	0
onco-lncRNA-4	ENST00000594027		LCAL82	chr19:46692422-46706291	5	2	0	3	1	3	0	0	3	3	1	0
onco-lncRNA-5	NR_109779	LINC01279		chr3:112315640-112320816	5	0	5	0	-1	-1	-1	0	-1	0	0	-1
onco-lncRNA-6	TCONS_00019822		LCAL60	chr11:2357486-2363246	5	0	2	3	3	3	0	3	0	-1	-1	0
onco-lncRNA-7	ENST00000504082			chr4:106058436-106061776	5	0	1	5	3	0	3	3	-2	0	3	0
onco-lncRNA-8	TCONS_l2_00017848	BMS1P17/BMS1P18		chr22:16151706-16192967	4	4	0	0	1	0	1	1	0	0	1	0
onco-lncRNA-9	uc001vvk.1	DUXAP10		chr14:19650031-19684290	4	4	0	0	1	0	1	1	0	0	1	0
onco-lncRNA-10	ENST00000504531	CASC9	LCAL80	chr8:76135638-76190696	4	3	0	2	0	0	0	1	3	1	2	0
onco-lncRNA-11	ENST00000415479		LCAL4	chr2:216582765-216584147	4	3	0	1	0	3	0	1	0	1	1	0
onco-lncRNA-12	ENST00000457958	LINC00511	LCAL5	chr17:70399462-70588479	4	3	0	1	0	1	3	0	0	1	1	0
onco-lncRNA-13	TCONS_00011213			chr6:35307828-35308188	4	2	0	3	3	0	3	2	0	0	1	0
onco-lncRNA-14	TCONS_00019120	LINC00958	LCAL89	chr11:13001160-13011095	4	2	0	3	0	3	0	1	3	0	2	0
onco-lncRNA-15	NR_110468	HAGLR		chr2:177037916-177042857	4	1	3	0	0	0	-1	1	0	0	-1	-1
onco-lncRNA-16	TCONS_00026823	TINCR		chr19:5558184-5581226	4	1	2	2	0	1	-2	0	0	-1	0	3
onco-lncRNA-17	ENST00000609300	LINC00261	LCAL62	chr20:22541429-22544906	4	1	2	2	0	3	0	0	0	-1	-2	1
onco-lncRNA-18	ENST00000583942	LOC100505817		chr18:70993975-71016598	4	1	0	4	3	0	3	2	0	3	0	0
onco-lncRNA-19	TCONS_00008143		LCAL43	chr4:84009929-84010241	4	0	4	0	0	0	-1	-1	0	-1	-1	0
onco-lncRNA-20	TCONS_00014342	MAGI2-AS3		chr7:79088786-79093984	4	0	4	0	-1	-1	0	0	0	0	-1	-1
onco-lncRNA-21	ENST00000600553	FENDRR	LCAL18	chr16:86510729-86524487	4	0	4	0	-1	0	-1	0	0	-1	-1	0
onco-lncRNA-22	NR_026779	LINC00341		chr14:95873603-95876427	4	0	4	0	-1	-1	0	0	0	-1	-1	0
onco-lncRNA-23	TCONS_00024657			chr16:53073298-53078119	4	0	3	1	0	0	0	0	-1	-1	-1	3
onco-lncRNA-24	TCONS_00025560	LINC00675		chr17:10698226-10707020	4	0	2	2	0	0	0	-1	-1	3	3	0
onco-lncRNA-25	NR_026860	LINC00473		chr6:166352947-166401527	4	0	2	2	-1	3	0	0	-1	3	0	0
onco-lncRNA-26	TCONS_l2_00001826			chr1:226726130-226728853	4	0	1	4	0	3	0	0	-2	3	3	0
onco-lncRNA-27	TCONS_l2_00025426		LCAL1	chr6:80017385-80023101	3	3	0	0	0	0	0	1	0	1	1	0
onco-lncRNA-28	TCONS_00019596		LCAL86	chr11:27238616-27240219	3	3	0	0	0	0	1	1	0	0	1	0
onco-lncRNA-29	TCONS_00020864		LCAL79	chr12:89175622-89177236	3	3	0	0	1	0	0	1	0	0	1	0
onco-lncRNA-30	NR_103783	BLACAT1	LCAL6	chr1:205404013-205425214	3	3	0	0	0	0	1	0	0	1	1	0
onco-lncRNA-31	uc003njq.2	FKSG63		chr6:27793689-27794715	3	3	0	0	0	0	0	1	1	0	1	0
onco-lncRNA-32	ENST00000550223	LINC01234		chr12:114183508-114211468	3	3	0	0	0	0	1	1	0	0	1	0
onco-lncRNA-33	ENST00000601079	LOC284801		chr20:26168267-26190098	3	2	1	1	0	0	2	1	-1	0	0	0
onco-lncRNA-34	TCONS_00004507	LINC01116		chr2:177494331-177502323	3	2	1	0	0	0	0	1	0	0	1	-1
onco-lncRNA-35	TCONS_00018114	LINC00707		chr10:6836942-6884743	3	2	0	1	0	3	0	1	1	0	0	0
onco-lncRNA-36	TCONS_00026750	UCA1	LCAL52	chr19:15939756-15946230	3	2	0	1	0	0	1	0	0	3	1	0
onco-lncRNA-37	TCONS_00029745			chr22:50981205-50983413	3	2	0	1	0	0	0	1	3	1	0	0
onco-lncRNA-38	ENST00000440326			chr2:208104373-208110312	3	2	0	1	0	0	0	1	3	0	1	0
onco-lncRNA-39	ENST00000455984		LCAL77	chr3:27863088-27901683	3	2	0	1	0	0	0	1	0	3	1	0
onco-lncRNA-40	uc003ysa.2	CCAT1	LCAL85	chr8:128219628-128231333	3	2	0	1	0	0	1	0	0	3	1	0
onco-lncRNA-41	ENST00000509399			chr4:104472083-104480284	3	2	0	1	0	0	3	1	0	0	1	0
onco-lncRNA-42	TCONS_00009975	PART1	LCAL92	chr5:59784030-59785670	3	1	2	1	0	0	0	-1	-2	0	1	0
onco-lncRNA-43	TCONS_l2_00004762			chr11:112151438-112162440	3	1	2	0	-1	0	-1	0	1	0	0	0
onco-lncRNA-44	TCONS_00000759			chr1:231658262-231664302	3	1	1	2	0	0	3	0	-2	0	1	0
onco-lncRNA-45	TCONS_00000698			chr1:182709782-182710939	3	1	1	1	0	0	0	1	-1	0	0	3
onco-lncRNA-46	ENST00000400831	LOC441178		chr6:168080305-168084467	3	1	1	1	0	3	1	-1	0	0	0	0
onco-lncRNA-47	ENST00000433510			chr17:46713284-46724385	3	1	1	1	0	0	3	1	-1	0	0	0
onco-lncRNA-48	TCONS_00011854			chr6:71104616-71109055	3	1	0	3	3	0	2	0	0	0	3	0
onco-lncRNA-49	NR_004855	HULC		chr6:8652441-8654080	3	1	0	3	0	0	2	0	3	0	3	0
onco-lncRNA-50	ENST00000505089			chr4:14472088-14889793	3	1	0	3	0	3	0	0	2	0	0	3
onco-lncRNA-51	TCONS_00029630			chr22:50984903-50986244	3	1	0	2	0	3	0	1	0	0	3	0
onco-lncRNA-52	ENST00000519144	LINC00968	LCAL25	chr8:57408804-57472145	3	0	3	1	0	-2	0	0	0	-1	-1	0
onco-lncRNA-53	TCONS_00005695		LCAL63	chr3:193558616-193561016	3	0	3	0	0	0	0	0	-1	-1	-1	0
onco-lncRNA-54	TCONS_00007953		LCAL47	chr4:1546984-1551959	3	0	3	0	-1	0	0	0	0	-1	-1	0
onco-lncRNA-55	TCONS_00008319		LCAL31	chr4:171147776-171204866	3	0	3	0	0	0	-1	0	-1	0	-1	0
onco-lncRNA-56	TCONS_l2_00022885	LOC100506674		chr5:44742519-44808883	3	0	3	0	-1	0	-1	0	-1	0	0	0
onco-lncRNA-57	TCONS_00010138	MIR143HG		chr5:148801040-148806264	3	0	3	0	-1	-1	-1	0	0	0	0	0
onco-lncRNA-58	TCONS_l2_00029054			chr9:132048307-132049406	3	0	3	0	0	0	0	-1	-1	0	-1	0
onco-lncRNA-59	TCONS_00020243			chr12:40579810-40617605	3	0	3	0	0	0	0	0	-1	-1	-1	0
onco-lncRNA-60	TCONS_00021896	LINC00551		chr13:107279239-107284309	3	0	3	0	0	0	0	0	-1	-1	-1	0
onco-lncRNA-61	TCONS_00022428		LCAL61	chr14:24081353-24089221	3	0	3	0	0	0	0	0	-1	-1	-1	0
onco-lncRNA-62	TCONS_00023441	LOC102723344		chr15:63723373-63730499	3	0	3	0	0	0	-1	-1	-1	0	0	0
onco-lncRNA-63	TCONS_l2_00009224	LOC100996492		chr15:80487819-80544417	3	0	3	0	0	0	0	0	-1	-1	-1	0
onco-lncRNA-64	TCONS_00025721		LCAL36	chr17:59470732-59475416	3	0	3	0	0	0	0	0	-1	-1	-1	0
onco-lncRNA-65	TCONS_00026862		LCAL42	chr19:781567-786255	3	0	3	0	0	0	0	0	-1	-1	-1	0
onco-lncRNA-66	TCONS_l2_00012922			chr19:20929696-20933118	3	0	3	0	0	0	0	0	-1	-1	-1	0
onco-lncRNA-67	ENST00000597702	PCAT19	LCAL41	chr19:41961683-42006539	3	0	3	0	-1	0	0	0	0	-1	-1	0
onco-lncRNA-68	ENST00000457989		LCAL20	chr12:40550040-40561414	3	0	3	0	0	0	0	0	-1	-1	-1	0
onco-lncRNA-69	uc002rnf.1		LCAL45	chr2:30569524-30573024	3	0	3	0	0	0	0	0	-1	-1	-1	0
onco-lncRNA-70	NR_033957	LINC00842		chr10:47096453-47151400	3	0	3	0	0	-1	-1	0	0	-1	0	0
onco-lncRNA-71	NR_024283	LINC00961	LCAL40	chr9:35909479-35911617	3	0	3	0	0	-1	0	0	0	-1	-1	0
onco-lncRNA-72	uc010irg.3	DEIN		chr4:174451608-174462981	3	0	3	0	-1	0	-1	0	0	0	0	-1
onco-lncRNA-73	ENST00000453666		LCAL23	chr7:104558006-104567077	3	0	3	0	0	0	0	0	-1	-1	-1	0
onco-lncRNA-74	ENST00000580756		LCAL48	chr18:316736-319165	3	0	3	0	-1	0	0	0	0	-1	-1	0
onco-lncRNA-75	ENST00000551450		LCAL39	chr12:112250596-112251224	3	0	3	0	0	0	0	0	-1	-1	-1	0
onco-lncRNA-76	TCONS_00009908			chr5:25188426-25302376	3	0	2	2	0	-1	3	0	-2	0	0	0
onco-lncRNA-77	TCONS_00015968		LCAL26	chr9:35913870-35914639	3	0	2	2	0	0	3	0	-2	0	-1	0
onco-lncRNA-78	TCONS_00016890			chr9:136125806-136126767	3	0	2	2	0	0	3	0	-2	0	-1	0
onco-lncRNA-79	ENST00000439707	LINC00284		chr13:44482862-44604597	3	0	2	2	0	3	0	-1	-2	0	0	0
onco-lncRNA-80	NR_024371	LINC00982		chr1:2980635-2984289	3	0	2	2	0	0	0	0	-2	0	-1	3
onco-lncRNA-81	TCONS_00017929	SFTA1P	LCAL34	chr10:10828606-10836943	3	0	2	1	0	0	0	3	0	-1	-1	0
onco-lncRNA-82	ENST00000556266	DIO3OS		chr14:102023640-102025113	3	0	2	1	-1	3	0	0	0	0	-1	0
onco-lncRNA-83	ENST00000555928	MEG3		chr14:101297817-101327363	3	0	2	1	-1	-1	0	0	3	0	0	0
onco-lncRNA-84	TCONS_00018519			chr10:54785023-54789855	3	0	1	3	0	0	3	0	-2	0	0	3
onco-lncRNA-85	uc002hng.1			chr17:35289408-35293921	3	0	1	3	0	3	0	0	-2	0	0	3
onco-lncRNA-86	ENST00000563192			chr16:2204797-2205359	3	0	1	3	0	0	3	0	-2	0	0	3
onco-lncRNA-87	TCONS_00008501			chr4:69610450-69616639	3	0	1	2	3	0	0	0	-1	0	3	0
onco-lncRNA-88	TCONS_l2_00021326			chr4:142246033-142253508	3	0	1	2	0	0	0	3	-1	3	0	0
onco-lncRNA-89	TCONS_00015431			chr8:40161197-40200930	3	0	1	2	0	3	0	0	-1	0	3	0
onco-lncRNA-90	TCONS_00005366			chr2:242486215-242489374	3	0	0	3	3	0	3	3	0	0	0	0
onco-lncRNA-91	ENST00000457364			chr5:180751370-180755068	3	0	0	3	3	0	0	3	0	0	3	0
onco-lncRNA-92	TCONS_00017740		LCAL87	chr10:85926985-85931832	2	2	0	1	0	0	0	0	2	0	1	0
onco-lncRNA-93	TCONS_l2_00017159			chr21:19093367-19110972	2	2	0	1	0	0	0	2	0	0	1	0
onco-lncRNA-94	TCONS_00001511			chr1:61053728-61088212	2	2	0	0	0	0	1	0	0	0	1	0
onco-lncRNA-95	TCONS_l2_00001306			chr1:83485231-83568608	2	2	0	0	0	0	0	1	0	0	1	0
onco-lncRNA-96	TCONS_00000371	PCAN-R1		chr1:202780089-202781041	2	2	0	0	0	0	0	0	0	1	1	0
onco-lncRNA-97	TCONS_00007922			chr4:184653377-184658726	2	2	0	0	0	0	0	1	0	0	1	0
onco-lncRNA-98	TCONS_00012377			chr6:170470884-170475667	2	2	0	0	0	0	0	1	0	0	1	0
onco-lncRNA-99	TCONS_00014973		LCAL102	chr8:37264138-37351380	2	2	0	0	0	0	1	0	0	0	1	0
onco-lncRNA-100	TCONS_00015365	PVT1		chr8:129108058-129113473	2	2	0	0	0	0	1	0	1	0	0	0
onco-lncRNA-101	TCONS_00024510			chr16:88219180-88220350	2	2	0	0	0	0	0	1	0	0	1	0
onco-lncRNA-102	ENST00000443947			chr7:13141015-13142014	2	2	0	0	0	0	0	1	0	0	1	0
onco-lncRNA-103	uc021wad.1			chr20:4100588-4124836	2	2	0	0	0	0	0	1	0	0	1	0
onco-lncRNA-104	uc011bta.1			chr3:195375289-195378976	2	2	0	0	1	0	0	0	0	0	1	0
onco-lncRNA-105	ENST00000559321			chr15:97954484-97975324	2	2	0	0	0	0	1	0	0	0	1	0
onco-lncRNA-106	ENST00000512035			chr5:92265-139978	2	2	0	0	0	0	0	1	0	0	1	0
onco-lncRNA-107	NR_026878	FOXD2-AS1		chr1:47897806-47900313	2	2	0	0	1	0	0	1	0	0	0	0
onco-lncRNA-108	ENST00000444865	LINC00460	LCAL74	chr13:107029139-107029993	2	2	0	0	0	0	1	1	0	0	0	0
onco-lncRNA-109	NR_103756	LINC00491		chr5:101944195-102007168	2	2	0	0	0	0	0	1	0	0	1	0
onco-lncRNA-110	ENST00000557518	LINC00519	LCAL91	chr14:51771133-51795104	2	2	0	0	0	0	0	1	0	0	1	0
onco-lncRNA-111	NR_103549	SCAL1	LCAL51	chr5:90606730-90610219	2	2	0	0	0	0	0	0	1	1	0	0
onco-lncRNA-112	ENST00000537192			chr12:5399645-5487520	2	2	0	0	0	0	0	1	0	0	1	0
onco-lncRNA-113	ENST00000439804			chr3:191275112-191308145	2	2	0	0	0	0	0	1	0	0	1	0
onco-lncRNA-114	ENST00000433644			chr9:98177115-98189078	2	2	0	0	0	0	1	0	0	0	1	0
onco-lncRNA-115	ENST00000561705		LCAL9	chr4:76006911-76009927	2	2	0	0	0	0	0	0	0	1	1	0
onco-lncRNA-116	ENST00000546784			chr14:45846470-45858489	2	2	0	0	0	0	0	1	0	0	1	0
onco-lncRNA-117	ENST00000478294			chr10:5636953-5638081	2	2	0	0	0	0	0	1	0	0	1	0
onco-lncRNA-118	ENST00000554032			chr14:71276921-71282108	2	2	0	0	0	0	0	0	0	1	1	0
onco-lncRNA-119	TCONS_l2_00014536	LOC102723854		chr2:43255083-43256403	2	1	1	1	0	-2	1	0	0	0	0	0
onco-lncRNA-120	uc021qoj.1			chr11:85822164-85823166	2	1	1	1	0	0	0	2	-1	0	0	0
onco-lncRNA-121	ENST00000552324			chr12:70574117-70595784	2	1	1	1	0	0	0	1	-2	0	0	0
onco-lncRNA-122	ENST00000419745			chr3:186528668-186543310	2	1	1	1	0	0	0	2	-1	0	0	0
onco-lncRNA-123	TCONS_00016354			chr9:75705955-75726824	2	1	1	0	0	0	0	-1	0	0	1	0
onco-lncRNA-124	TCONS_00022099			chr13:100738208-100741196	2	1	1	0	0	0	0	0	-1	0	1	0
onco-lncRNA-125	TCONS_l2_00017190			chr21:29818611-29998954	2	1	1	0	-1	0	0	0	0	0	1	0
onco-lncRNA-126	uc002jit.1	LINC01152		chr17:70026956-70035822	2	1	1	0	0	-1	0	0	1	0	0	0
onco-lncRNA-127	NR_026690	ABHD11-AS1		chr7:73149398-73150330	2	1	1	0	0	0	0	0	1	0	-1	0
onco-lncRNA-128	TCONS_00005419	LINC00506		chr3:87138429-87147851	2	1	0	2	0	0	0	0	2	0	0	3
onco-lncRNA-129	ENST00000413290			chr2:196313255-196343649	2	1	0	2	0	0	2	0	0	0	3	0
onco-lncRNA-130	TCONS_00000008	LINC00626		chr1:168756178-168762120	2	1	0	1	0	0	0	0	3	0	1	0
onco-lncRNA-131	TCONS_l2_00018982			chr3:165178254-165209055	2	1	0	1	0	0	0	1	0	0	3	0
onco-lncRNA-132	TCONS_00012368	LINC01018		chr6:169558402-169562907	2	1	0	1	0	0	0	1	3	0	0	0
onco-lncRNA-133	TCONS_00017736			chr10:54210637-54215032	2	1	0	1	0	3	0	1	0	0	0	0
onco-lncRNA-134	TCONS_00019179			chr11:287701-288773	2	1	0	1	0	0	1	0	3	0	0	0
onco-lncRNA-135	TCONS_l2_00005286	LOC650368		chr11:3402190-3419300	2	1	0	1	0	3	0	1	0	0	0	0
onco-lncRNA-136	TCONS_l2_00009437			chr15:55219996-55358596	2	1	0	1	0	0	0	3	0	0	1	0
onco-lncRNA-137	TCONS_00024663	CRNDE		chr16:54952844-54962691	2	1	0	1	0	3	1	0	0	0	0	0
onco-lncRNA-138	TCONS_00029315	LINC00162		chr21:46419361-46420332	2	1	0	1	0	0	0	1	3	0	0	0
onco-lncRNA-139	ENST00000538734	LINC00925		chr15:89921346-89939471	2	1	0	1	0	0	0	0	0	0	1	3
onco-lncRNA-140	ENST00000589662			chr18:53388548-53455992	2	1	0	1	0	0	3	0	0	0	1	0
onco-lncRNA-141	ENST00000423943	LINC01133	LCAL100	chr1:159931013-159948851	2	1	0	1	0	3	0	0	0	0	1	0
onco-lncRNA-142	ENST00000448374	APCDD1L-AS1		chr20:57090554-57099784	2	0	2	2	0	-2	0	0	-2	0	0	0
onco-lncRNA-143	TCONS_00008505			chr4:76103903-76105665	2	0	2	1	0	0	-1	0	-2	0	0	0
onco-lncRNA-144	TCONS_00014250	LOC101927391		chr7:7591940-7606158	2	0	2	1	0	0	0	0	-2	0	-1	0
onco-lncRNA-145	TCONS_l2_00025701			chr7:20257233-20261304	2	0	2	1	0	0	0	-1	-2	0	0	0
onco-lncRNA-146	TCONS_00013633	WDR86-AS1		chr7:151109051-151110099	2	0	2	1	0	-2	0	0	0	0	-1	0
onco-lncRNA-147	ENST00000574086			chr8:121066918-121068440	2	0	2	1	0	0	0	-1	-2	0	0	0
onco-lncRNA-148	TCONS_00004835		LCAL58	chr2:85938745-85943145	2	0	2	0	0	0	0	0	0	-1	-1	0
onco-lncRNA-149	TCONS_00006644		LCAL11	chr3:127095086-127109446	2	0	2	0	0	0	0	0	0	-1	-1	0
onco-lncRNA-150	TCONS_00008694		LCAL27	chr4:185764499-185774699	2	0	2	0	0	0	0	0	0	-1	-1	0
onco-lncRNA-151	TCONS_00009526			chr5:141227142-141231803	2	0	2	0	0	0	0	0	-1	0	-1	0
onco-lncRNA-152	TCONS_l2_00024193		LCAL35	chr6:35512644-35514379	2	0	2	0	0	0	0	0	0	-1	-1	0
onco-lncRNA-153	TCONS_00012018			chr6:168152125-168152763	2	0	2	0	0	0	0	-1	-1	0	0	0
onco-lncRNA-154	TCONS_l2_00029287		LCAL49	chr9:43184316-43187301	2	0	2	0	0	0	0	0	-1	0	-1	0
onco-lncRNA-155	TCONS_l2_00029090	HMCN2		chr9:133244988-133251373	2	0	2	0	-1	0	-1	0	0	0	0	0
onco-lncRNA-156	TCONS_00016726		LCAL17	chr9:139541957-139543517	2	0	2	0	0	0	0	0	0	-1	-1	0
onco-lncRNA-157	TCONS_l2_00003114	ZNF503-AS1		chr10:77118801-77121383	2	0	2	0	0	0	0	-1	0	0	-1	0
onco-lncRNA-158	TCONS_l2_00004589			chr11:66176791-66184301	2	0	2	0	-1	0	-1	0	0	0	0	0
onco-lncRNA-159	TCONS_00020237			chr12:117147982-117150681	2	0	2	0	0	0	0	0	0	-1	-1	0
onco-lncRNA-160	TCONS_00022469		LCAL37	chr14:36690499-36704816	2	0	2	0	0	0	0	0	0	-1	-1	0
onco-lncRNA-161	TCONS_00022803			chr14:77540151-77542695	2	0	2	0	0	0	0	0	0	-1	-1	0
onco-lncRNA-162	TCONS_00023353			chr15:38276925-38317171	2	0	2	0	0	0	0	0	0	-1	-1	0
onco-lncRNA-163	TCONS_00024586	LOC101927311		chr16:14100905-14109857	2	0	2	0	0	0	0	0	0	-1	-1	0
onco-lncRNA-164	TCONS_00025599			chr17:26557601-26561264	2	0	2	0	0	0	0	0	-1	0	-1	0
onco-lncRNA-165	TCONS_l2_00011026			chr17:81054161-81055419	2	0	2	0	0	0	0	0	-1	0	-1	0
onco-lncRNA-166	TCONS_00027125	ZNF582-AS1		chr19:56905076-56910481	2	0	2	0	0	0	0	0	-1	0	-1	0
onco-lncRNA-167	TCONS_l2_00017555	TPTEP1		chr22:17082900-17095981	2	0	2	0	0	0	0	0	-1	0	-1	0
onco-lncRNA-168	ENST00000425887		LCAL15	chr2:96331831-96334463	2	0	2	0	0	0	0	0	0	-1	-1	0
onco-lncRNA-169	ENST00000423808			chr21:29462632-29475109	2	0	2	0	0	-1	0	-1	0	0	0	0
onco-lncRNA-170	ENST00000416553		LCAL54	chr11:131123316-131170666	2	0	2	0	0	0	0	0	0	-1	-1	0
onco-lncRNA-171	uc002tjx.4			chr2:114297631-114300242	2	0	2	0	-1	0	-1	0	0	0	0	0
onco-lncRNA-172	uc003gho.3			chr4:4034896-4076783	2	0	2	0	0	0	0	0	0	-1	-1	0
onco-lncRNA-173	NR_024129	LINC00092		chr9:98782013-98784037	2	0	2	0	0	0	0	0	0	-1	-1	0
onco-lncRNA-174	NR_024065	LINC00312		chr3:8613467-8616354	2	0	2	0	-1	0	0	0	0	0	0	-1
onco-lncRNA-175	NR_103859	LINC01082		chr16:86229786-86233324	2	0	2	0	-1	0	-1	0	0	0	0	0
onco-lncRNA-176	NR_110514	EP300-AS1		chr22:41581218-41593505	2	0	2	0	0	0	0	0	0	-1	-1	0
onco-lncRNA-177	NR_109861	LOC101929371	LCAL19	chr20:9966980-9987764	2	0	2	0	0	0	0	0	0	-1	-1	0
onco-lncRNA-178	NR_027086	LOC284578		chr1:205523400-205525763	2	0	2	0	0	-1	0	0	-1	0	0	0
onco-lncRNA-179	ENST00000573270		LCAL12	chr17:4513743-4520945	2	0	2	0	0	0	0	0	0	-1	-1	0
onco-lncRNA-180	ENST00000508512		LCAL22	chr5:66759636-66771305	2	0	2	0	0	0	0	0	0	-1	-1	0
onco-lncRNA-181	ENST00000577123			chr16:3126911-3128691	2	0	2	0	0	0	0	0	0	-1	-1	0
onco-lncRNA-182	ENST00000477643			chr3:108855687-108868973	2	0	2	0	0	0	-1	0	-1	0	0	0
onco-lncRNA-183	ENST00000531511			chr11:76365212-76367756	2	0	2	0	0	0	0	0	-1	0	-1	0
onco-lncRNA-184	TCONS_l2_00013871			chr2:105470368-105471665	2	0	1	2	0	0	0	0	-2	3	0	0
onco-lncRNA-185	TCONS_00009859		LCAL78	chr5:6586436-6587959	2	0	1	2	0	3	0	0	-2	0	0	0
onco-lncRNA-186	TCONS_l2_00029476			chr9:97109391-97109900	2	0	1	2	0	0	3	0	-2	0	0	0
onco-lncRNA-187	TCONS_00018618			chr10:121861758-121863424	2	0	1	2	0	3	0	0	-2	0	0	0
onco-lncRNA-188	TCONS_00019861			chr11:17402305-17403209	2	0	1	2	0	0	3	0	-2	0	0	0
onco-lncRNA-189	TCONS_l2_00007364			chr13:23477401-23493348	2	0	1	2	0	0	0	0	-2	0	0	3
onco-lncRNA-190	TCONS_00023109			chr14:55695907-55696519	2	0	1	2	0	0	3	0	-2	0	0	0
onco-lncRNA-191	TCONS_00029068			chr21:9826393-9827584	2	0	1	2	0	0	3	0	-2	0	0	0
onco-lncRNA-192	NR_047498	LINC00853		chr1:47644921-47646011	2	0	1	2	0	0	3	0	-2	0	0	0
onco-lncRNA-193	ENST00000567961	LMF1		chr16:1025760-1026912	2	0	1	2	0	-2	0	0	3	0	0	0
onco-lncRNA-194	ENST00000562549			chr16:46656772-46658355	2	0	1	2	0	0	3	0	-2	0	0	0
onco-lncRNA-195	NR_045196	SNHG18		chr5:9546311-9550409	2	0	1	2	0	0	3	0	-2	0	0	0
onco-lncRNA-196	TCONS_00002280	LINC00982		chr1:2976191-2977962	2	0	1	1	0	0	0	0	-1	0	0	3
onco-lncRNA-197	TCONS_l2_00014333			chr2:242627226-242633572	2	0	1	1	0	0	3	0	-1	0	0	0
onco-lncRNA-198	TCONS_00009133			chr4:145122622-145132014	2	0	1	1	0	0	0	0	-1	3	0	0
onco-lncRNA-199	TCONS_00010961			chr5:72542336-72570644	2	0	1	1	0	0	0	-1	3	0	0	0
onco-lncRNA-200	TCONS_00015190			chr8:144362881-144363898	2	0	1	1	0	0	3	0	-1	0	0	0
onco-lncRNA-201	TCONS_00023972	PCAT-56/PCAT-59		chr15:69856083-69863357	2	0	1	1	0	0	-1	0	0	0	3	0
onco-lncRNA-202	TCONS_00024399	LOC101927364		chr16:51788705-51837421	2	0	1	1	3	0	0	0	-1	0	0	0
onco-lncRNA-203	TCONS_00025378			chr17:37721023-37723729	2	0	1	1	0	0	3	0	-1	0	0	0
onco-lncRNA-204	TCONS_00026970			chr19:23740396-23741230	2	0	1	1	0	0	0	0	-1	3	0	0
onco-lncRNA-205	TCONS_00028348			chr20:24071566-24092596	2	0	1	1	0	0	0	0	-1	3	0	0
onco-lncRNA-206	TCONS_00028028			chr20:24911283-24913619	2	0	1	1	0	0	3	0	-1	0	0	0
onco-lncRNA-207	TCONS_00027985			chr20:62258602-62260060	2	0	1	1	0	0	3	0	-1	0	0	0
onco-lncRNA-208	TCONS_00029256		LCAL29	chr21:16115526-16116886	2	0	1	1	0	0	0	0	3	0	-1	0
onco-lncRNA-209	uc011abu.2			chr21:9711934-9769227	2	0	1	1	0	3	0	0	0	0	-1	0
onco-lncRNA-210	ENST00000478824			chr17:46782564-46784708	2	0	1	1	0	0	3	0	-1	0	0	0
onco-lncRNA-211	ENST00000595005			chr19:50990066-50990895	2	0	1	1	0	0	0	0	0	3	-1	0
onco-lncRNA-212	ENST00000580684	LINC00667		chr18:5238548-5243910	2	0	1	1	0	0	3	0	0	0	0	-1
onco-lncRNA-213	ENST00000599605	LINC00948		chr10:61496955-61504622	2	0	1	1	0	0	3	0	-1	0	0	0
onco-lncRNA-214	NR_103775	LOC100505984	LCAL109	chr2:161114229-161128406	2	0	1	1	0	0	0	3	0	0	-1	0
onco-lncRNA-215	NR_024418	LOC389332		chr5:135527155-135528851	2	0	1	1	0	0	-1	0	0	0	0	3
onco-lncRNA-216	ENST00000530759			chr11:76152381-76155618	2	0	1	1	0	0	3	0	-1	0	0	0
onco-lncRNA-217	ENST00000422780			chr12:8940852-8947093	2	0	1	1	0	0	0	3	0	0	-1	0
onco-lncRNA-218	TCONS_00006403			chr3:5732229-5741025	2	0	0	2	0	0	3	0	0	3	0	0
onco-lncRNA-219	TCONS_l2_00025696	LOC102659288		chr7:17490664-17506109	2	0	0	2	0	0	0	0	3	0	3	0
onco-lncRNA-220	TCONS_00013877			chr7:84568661-84569351	2	0	0	2	0	0	3	0	0	0	0	3
onco-lncRNA-221	TCONS_00014977			chr8:37455061-37456790	2	0	0	2	0	0	3	0	3	0	0	0
onco-lncRNA-222	TCONS_00020094			chr11:69290398-69291552	2	0	0	2	0	0	3	0	3	0	0	0
onco-lncRNA-223	TCONS_l2_00006118			chr12:9549678-9550529	2	0	0	2	0	3	0	3	0	0	0	0
onco-lncRNA-224	ENST00000449713			chr21:45905459-45910171	2	0	0	2	0	0	3	3	0	0	0	0
onco-lncRNA-225	ENST00000606706	LINC00458		chr13:54699129-54706954	2	0	0	2	0	0	3	0	0	0	0	3
onco-lncRNA-226	uc001lsz.3	MUC5AC	LCAL110	chr11:1213089-1222366	2	0	0	2	0	0	0	3	0	3	0	0
onco-lncRNA-227	ENST00000507644			chr4:187812122-187813520	2	0	0	2	0	0	3	0	0	0	3	0
onco-lncRNA-228	NR_034011	SNHG8		chr4:119199916-119200978	2	0	0	2	0	3	0	0	3	0	0	0
onco-lncRNA-229	ENST00000460130	TCL6		chr14:96116837-96120984	2	0	0	2	0	0	0	0	3	0	3	0

## Sheet: SuppTable6
Supplementary Table 6 | Onco-lncRNAs previously reported to be differentially expressed in various cancers and are potential clinical biomarkers.
Onco-lncRNA	HUGO	PMID	Cancer type
onco-lncRNA-15	HAGLR	25522241	neuroblastoma
onco-lncRNA-17	LINC00261	23801869	Gastric
Onco-lncRNA-21	FENDRR	25167886	Gastric
onco-lncRNA-27	LCAL1	25116943	Lung
onco-lncRNA-30	BLACAT1	23688781	Bladder
onco-lncRNA-32	LINC01234/ENST00000547963.1	24522499	Oesphageal
onco-lncRNA-36	UCA1	24332332	Tongue Squamous Cell
		25123267	Bladder
		24892958	Melanoma
onco-lncRNA-40	CCAT1	23416875	Colon
		25561974	Gastric
onco-lncRNA-42	PART1	10706094	Prostate
onco-lncRNA-49	HULC	23762823	Liver
onco-lncRNA-60	LINC00551	24906504	Lung
onco-lncRNA-67	PCAT19	21804560	Prostate
onco-lncRNA-72	DEIN	18171985	Neuroblastoma
onco-lncRNA-83	MEG3	23790166	Cervical
		23145177	Liver
onco-lncRNA-96	PCAN-R1/PCAT6	23728290	Prostate
onco-lncRNA-100	PVT1	24196785	Colon
onco-lncRNA-111	LUCAT1	23672216	Lung
onco-lncRNA-127	LINC00035/ABHD11-AS1	24984296	Gastric
onco-lncRNA-137	CRNDE	22393467	Colon
onco-lncRNA-174	LINC00312	12452030	Nasopharyngeal carcinoma
onco-lncRNA-201	PCAT-56/PCAT-59	21804560	Prostate
onco-lncRNA-229	TCL6	10851082	Leukemia

## Sheet: SuppTable7
Supplementary Table 7 | LncRNAs residing in copy number ampliflications. Correlation between lncRNA expression level (FPKM) and copy number value, along with significance as determined by a permutation test, are also reported.
Cohort	lncRNA	AmplifiedRegion	Correlation	P-value
COAD	NR_103783	chr1:120520716-249250621(probes 67639:128888)	0.295	0
READ	NR_103783	chr1:202853626-209439928(probes 99976:104200)	0.321	0
COAD	TCONS_00000759	chr1:120520716-249250621(probes 67639:128888)	0.265	0
KIRC	TCONS_00015365	chr8:118124777-146364022(probes 810667:827872)	0.183	0
BLCA	uc011bta.1	chr3:160803527-198022430(probes 347819:366157)	0.216	0.007
LUSC	ENST00000559321	chr15:92964429-102531392(probes 1272062:1277238)	0.089	0.083
HNSC	ENST00000512035	chr5:1-1416141(probes 468701:468809)	0.281	0
LUSC	ENST00000512035	chr5:1-1288018(probes 468701:468751)	0.262	0
READ	ENST00000444865	chr13:70926100-115169878(probes 1155919:1183538)	0.216	0.008
HNSC	ENST00000552324	chr12:65731265-71180536(probes 1087379:1091121)	0.081	0.072
READ	TCONS_00027985	chr20:62142103-63025520(probes 1458318:1458342)	0.206	0.008
READ	ENST00000521586	chr8:128401773-128415350(probes 817651:817665)	0.224	0.004
BRCA	TCONS_l2_00003637	chr10:80467192-82012440(probes 942102:942717)	0.324	0
HNSC	TCONS_00026239	chr18:3464044-3610409(probes 1356008:1356087)	0.089	0.06
COAD	TCONS_l2_00016266	chr20:41541403-61678336(probes 1444643:1458201)	0.681	0

## Sheet: SuppTable8
Supplementary Table 8 | LncRNAs residing in copy number deletions. Correlation between lncRNA expression level (FPKM) and copy number value, along with significance as determined by a permutation test, are also reported.
Cohort	lncRNA	DeletedRegion	Correlation	P-value
BRCA	NR_026779	chr14:81998189-107349540(probes 1218444:1232853)	0.016	0.332
LUAD	NR_026779	chr14:94758047-107349540(probes 1226208:1232853)	0.136	0.004
BLCA	NR_026860	chr6:119669222-171115067(probes 634651:665299)	0.076	0.198
HNSC	TCONS_00009975	chr5:58145167-59787985(probes 499631:500651)	0.045	0.218
BLCA	TCONS_l2_00004762	chr11:89321214-135006516(probes 1024266:1053327)	0.201	0.012
COAD	TCONS_l2_00004762	chr11:104939777-115045236(probes 1033791:1040124)	0.104	0.026
READ	TCONS_l2_00004762	chr7:110725672-111366370(probes 721540:721583)	0.247	0.001
LUAD	TCONS_00005695	chr3:184770395-198022430(probes 359236:366157)	-0.023	0.655
KIRC	TCONS_00008319	chr4:146049535-191154276(probes 445894:468700)	-0.036	0.764
LUSC	TCONS_00008319	chr4:124851511-186507186(probes 434770:467318)	0.063	0.177
LUAD	NR_033957	chr10:38987241-135534747(probes 921674:976269)	0.043	0.224
BLCA	uc010irg.3	chr4:160279363-191154276(probes 453924:468700)	-0.113	0.909
LUAD	ENST00000551450	chr12:77271314-133851895(probes 1094545:1127041)	-0.091	0.939
HNSC	ENST00000439707	chr13:33635940-73639691(probes 1135662:1157585)	-0.029	0.684
LUSC	NR_024371	chr1:1-27737334(probes 1:12874)	0.098	0.073
BRCA	ENST00000555928	chr14:81998189-107349540(probes 1218444:1232853)	0.074	0.029
LUAD	TCONS_00008694	chr4:176920228-191154276(probes 462926:468700)	0.096	0.049
LUSC	TCONS_00008694	chr4:124851511-186507186(probes 434770:467318)	0.151	0.012
LUSC	TCONS_00009526	chr5:65475684-180915260(probes 503470:569029)	0.088	0.101
LUSC	TCONS_l2_00029287	chr9:38619152-71152237(probes 850912:851146)	-0.114	0.962
LUAD	TCONS_00020237	chr12:77271314-133851895(probes 1094545:1127041)	0.135	0.017
LUSC	TCONS_00020237	chr12:113904794-133851895(probes 1116912:1127041)	0.147	0.013
LUAD	TCONS_00023353	chr15:1-49031144(probes 1232854:1245622)	-0.111	0.978
LUSC	TCONS_00023353	chr15:1-42274460(probes 1232854:1242000)	-0.044	0.738
LUSC	TCONS_l2_00011026	chr17:80443432-81195210(probes 1354456:1354728)	0.018	0.41
LUSC	TCONS_l2_00017555	chr22:1-22096801(probes 1478880:1479630)	0.201	0.001
LUAD	ENST00000416553	chr11:106886059-135006516(probes 1034970:1053327)	0.095	0.05
LUSC	ENST00000508512	chr5:65475684-180915260(probes 503470:569029)	-0.057	0.816
LUSC	ENST00000577123	chr16:1-7388343(probes 1277239:1279953)	0.118	0.034
KIRC	TCONS_00002280	chr1:1-29140747(probes 1:13403)	0.026	0.274
KIRC	TCONS_l2_00014333	chr2:237489905-243199373(probes 257084:259977)	0.042	0.191
LUSC	uc011abu.2	chr21:1-15482604(probes 1458343:1458385)	0.09	0.074
COAD	TCONS_00001555	chr1:58714075-119426205(probes 30038:66946)	0.068	0.083
READ	TCONS_00001555	chr1:49193395-50514967(probes 24270:24843)	0.052	0.289
KIRC	TCONS_l2_00001801	chr1:211603844-249250621(probes 105756:128888)	0.015	0.353
KIRC	TCONS_l2_00002788	chr1:211603844-249250621(probes 105756:128888)	-0.026	0.701
KIRC	TCONS_00000416	chr1:211603844-249250621(probes 105756:128888)	0.02	0.332
KIRC	TCONS_00002272	chr1:211603844-249250621(probes 105756:128888)	0.036	0.226
KIRC	TCONS_00003525	chr2:237489905-243199373(probes 257084:259977)	0.057	0.09
KIRC	TCONS_00006505	chr3:41907780-49872166(probes 283725:287535)	-0.013	0.608
KIRC	TCONS_00008904	chr4:146049535-191154276(probes 445894:468700)	0.083	0.036
KIRC	TCONS_00008951	chr4:146049535-191154276(probes 445894:468700)	0.067	0.068
LUAD	TCONS_l2_00024517	chr6:144513002-171115067(probes 649666:665299)	0.123	0.012
LUAD	TCONS_00015672	chr9:38619152-71152237(probes 850912:851146)	0.029	0.315
KIRC	TCONS_l2_00003833	chr10:108922700-135534747(probes 959220:976269)	0.028	0.241
COAD	TCONS_00019766	chr11:104939777-115045236(probes 1033791:1040124)	0.087	0.047
READ	TCONS_00019766	chr7:110725672-111366370(probes 721540:721583)	-0.01	0.524
HNSC	TCONS_00019767	chr11:105849158-118315445(probes 1034298:1042448)	0.136	0.007
READ	TCONS_00020754	chr8:15092726-16024383(probes 753502:754128)	0.03	0.375
READ	TCONS_00020613	chr8:15092726-16024383(probes 753502:754128)	-0.161	0.964
READ	TCONS_00020991	chr8:15092726-16024383(probes 753502:754128)	-0.131	0.929
BRCA	TCONS_00021458	chr12:118808682-133851895(probes 1120198:1127041)	-0.105	0.997
KIRC	TCONS_00021645	chr13:1-64946542(probes 1127042:1152876)	0.021	0.334
KIRC	TCONS_l2_00007167	chr13:1-64946542(probes 1127042:1152876)	0.026	0.269
BLCA	TCONS_00023882	chr15:24927774-32934882(probes 1233383:1236077)	0.106	0.111
BLCA	TCONS_00023883	chr15:24927774-32934882(probes 1233383:1236077)	0.112	0.091
BLCA	TCONS_00023320	chr15:24927774-32934882(probes 1233383:1236077)	0.141	0.041
READ	TCONS_00025506	chr14:69062324-107349540(probes 1210237:1232853)	0.124	0.097
READ	TCONS_00028106	chr16:78129058-79627770(probes 1310350:1311702)	0.123	0.086
BLCA	TCONS_00029612	chr22:39186413-51304566(probes 1489472:1495722)	-0.285	1
COAD	ENST00000497872	chr14:69062324-107349540(probes 1210237:1232853)	-0.054	0.872
COAD	uc010miz.3	chr9:21383194-23690570(probes 840953:842404)	0.016	0.357
HNSC	NR_038433	chr13:33635940-73639691(probes 1135662:1157585)	-0.105	0.972
KIRC	NR_037847	chr1:1-29140747(probes 1:13403)	0.075	0.056
BLCA	uc022asc.1	chr8:1-13434226(probes 746488:752229)	0.374	0
BRCA	ENST00000411798	chr1:86620210-114935947(probes 47595:64165)	0.089	0.017
COAD	ENST00000610223	chr4:184363857-185675132(probes 466749:467159)	0.038	0.211
READ	ENST00000610223	chr2:231563535-243199373(probes 253670:259977)	0.161	0.031
KIRC	ENST00000507152	chr4:146049535-191154276(probes 445894:468700)	-0.024	0.691
KIRC	NR_110614	chr1:211603844-249250621(probes 105756:128888)	0.005	0.485
KIRC	ENST00000505053	chr4:146049535-191154276(probes 445894:468700)	0.011	0.422
READ	ENST00000524613	chr6:161693099-163153207(probes 660906:661553)	0.103	0.143
KIRC	ENST00000417705	chr1:1-29140747(probes 1:13403)	0.132	0.005
READ	ENST00000551421	chr8:15092726-16024383(probes 753502:754128)	0.091	0.147
KIRC	ENST00000482617	chr3:79814918-84688247(probes 305633:308067)	0.041	0.204
LUAD	ENST00000433614	chr9:38619152-71152237(probes 850912:851146)	0.035	0.278
READ	ENST00000417299	chr16:78129058-79627770(probes 1310350:1311702)	0.269	0.001
LUSC	ENST00000448624	chr1:1-27737334(probes 1:12874)	0.104	0.041
LUSC	uc001tvs.2	chr12:113904794-133851895(probes 1116912:1127041)	-0.037	0.726
READ	ENST00000299997	chr16:5144019-7771745(probes 1278894:1280371)	-0.066	0.762

## Sheet: SuppTable9
Supplementary Table 9 | Significant association between lncRNA expression and mutations. Also reported are the mutational frequency and p-value and false discovery rate (FDR) of the association between lncRNA expression (FPKM) and mutational status. Fold changes are reported as the mean FPKM of the mutated samples relative to the mean FPKM of the wild type samples.
Cancer	lncRNA	Oncolnc ID	MutatedGene	MutationFreq	p-value	FDR	FoldChange
BRCA	uc011ara.2	onco-lncRNA-1	TP53	0.341108	3.7362e-36	1.23295e-33	2.293
LUAD	uc011ara.2	onco-lncRNA-1	TP53	0.503356	0.000136811	0.0458865	1.68163
UCEC	uc011ara.2	onco-lncRNA-1	TP53	0.22695	2.90291e-06	0.00295817	1.64804
CRC	ENST00000553153	onco-lncRNA-2	TP53	0.515	7.34383e-05	0.0203805	1.86074
HNSC	ENST00000553153	onco-lncRNA-2	TP53	0.71	1.1049e-06	8.4974e-05	1.70323
BRCA	NR_033849	onco-lncRNA-3	TP53	0.341108	4.26333e-06	6.69951e-05	1.20792
HNSC	NR_033849	onco-lncRNA-3	NOTCH1	0.206667	0.00155111	0.044026	0.780253
LUAD	NR_033849	onco-lncRNA-3	KEAP1	0.187919	2.12037e-05	0.0171621	1.53895
BRCA	ENST00000594027	onco-lncRNA-4	GATA3	0.102041	1.19549e-05	0.000151735	0.338771
BRCA	ENST00000594027	onco-lncRNA-4	TP53	0.341108	5.45733e-06	7.83008e-05	3.53121
LUAD	TCONS_00019822	onco-lncRNA-6	TP53	0.503356	0.000100011	0.0458865	0.542433
CRC	ENST00000504082	onco-lncRNA-7	ACVR2A	0.115	0.000333854	0.0413979	1.50192
HNSC	ENST00000504082	onco-lncRNA-7	NSD1	0.11	0.000397591	0.0156135	1.51528
HNSC	ENST00000504082	onco-lncRNA-7	TP53	0.71	2.49272e-05	0.001658	1.4757
HNSC	TCONS_l2_00017848	onco-lncRNA-8	TP53	0.71	0.000399697	0.0156135	1.44245
BRCA	ENST00000457958	onco-lncRNA-12	TP53	0.341108	1.96888e-22	3.24865e-20	4.00592
CRC	ENST00000457958	onco-lncRNA-12	ACVR2A	0.115	0.00038531	0.0428389	0.680876
CRC	ENST00000457958	onco-lncRNA-12	TGFBR2	0.11	0.000406893	0.0428389	0.678059
HNSC	TCONS_00011213	onco-lncRNA-13	CDKN2A	0.216667	0.000140766	0.0070699	1.42722
HNSC	TCONS_00011213	onco-lncRNA-13	TP53	0.71	4.968e-15	1.22262e-11	2.20261
BRCA	TCONS_00019120	onco-lncRNA-14	CDH1	0.0772595	0.00321028	0.0220707	1.05934
BRCA	TCONS_00019120	onco-lncRNA-14	TP53	0.341108	2.79195e-05	0.000317704	1.18956
CRC	NR_110468	onco-lncRNA-15	APC	0.77	0.000238089	0.0349615	0.508997
BRCA	TCONS_00026823	onco-lncRNA-16	TP53	0.341108	4.11261e-06	6.69951e-05	1.47346
BRCA	ENST00000609300	onco-lncRNA-17	TP53	0.341108	0.00493227	0.0319147	131.695
UCEC	ENST00000609300	onco-lncRNA-17	PTEN	0.737589	5.02237e-06	0.00295817	3.38625
HNSC	ENST00000583942	onco-lncRNA-18	AJUBA	0.0566667	0.000733799	0.0231523	3.74285
HNSC	ENST00000583942	onco-lncRNA-18	TP53	0.71	5.6485e-07	4.48418e-05	2.44352
HNSC	TCONS_00008143	onco-lncRNA-19	TP53	0.71	5.83611e-09	6.52849e-07	0.181052
BRCA	TCONS_00014342	onco-lncRNA-20	TP53	0.341108	1.72675e-07	3.79886e-06	0.773021
CRC	ENST00000600553	onco-lncRNA-21	ACVR2A	0.115	0.000370671	0.0428389	0.560216
CRC	ENST00000600553	onco-lncRNA-21	FBXW7	0.185	8.28987e-05	0.0203805	0.65742
CRC	ENST00000600553	onco-lncRNA-21	TGFBR2	0.11	9.54258e-05	0.0203805	0.606974
BRCA	NR_026779	onco-lncRNA-22	TP53	0.341108	0.000757444	0.0060965	0.84687
LUAD	NR_026860	onco-lncRNA-25	STK11	0.107383	5.928e-06	0.00994126	8.0842
HNSC	TCONS_l2_00025426	onco-lncRNA-27	CDKN2A	0.216667	0.000180473	0.0083801	2.3589
HNSC	TCONS_l2_00025426	onco-lncRNA-27	NFE2L2	0.0566667	0.000505541	0.0185692	1.90069
HNSC	TCONS_l2_00025426	onco-lncRNA-27	TP53	0.71	3.80389e-07	3.22806e-05	2.81288
LUSC	TCONS_l2_00025426	onco-lncRNA-27	NFE2L2	0.141243	3.59655e-06	0.0163967	2.52223
HNSC	TCONS_00020864	onco-lncRNA-29	MLL2	0.183333	0.00134183	0.0402288	1.58768
HNSC	TCONS_00020864	onco-lncRNA-29	NAV3	0.0966667	0.000112884	0.00603931	2.06701
HNSC	TCONS_00020864	onco-lncRNA-29	NSD1	0.11	3.56642e-06	0.000265969	2.16385
HNSC	TCONS_00020864	onco-lncRNA-29	TP53	0.71	0.000102076	0.00570931	1.62308
HNSC	uc003njq.2	onco-lncRNA-31	CDKN2A	0.216667	0.000784512	0.024439	1.31784
HNSC	uc003njq.2	onco-lncRNA-31	TP53	0.71	4.26896e-12	7.50423e-10	1.89483
HNSC	ENST00000550223	onco-lncRNA-32	TP53	0.71	1.88682e-09	2.32173e-07	5.06571
LUSC	ENST00000550223	onco-lncRNA-32	CDKN2A	0.152542	2.00728e-05	0.0450762	3.54937
BRCA	TCONS_00018114	onco-lncRNA-35	GATA3	0.102041	8.84149e-05	0.000895279	0.0502489
BRCA	TCONS_00018114	onco-lncRNA-35	TP53	0.341108	4.76739e-05	0.000507496	5.53096
HNSC	TCONS_00018114	onco-lncRNA-35	NOTCH1	0.206667	0.000661435	0.0216066	1.35989
CRC	TCONS_00026750	onco-lncRNA-36	APC	0.77	0.000542751	0.0498733	1.80319
HNSC	ENST00000440326	onco-lncRNA-38	TP53	0.71	1.90805e-07	1.67704e-05	1.5088
HNSC	ENST00000455984	onco-lncRNA-39	TP53	0.71	9.22294e-05	0.00527853	1.33679
CRC	uc003ysa.2	onco-lncRNA-40	APC	0.77	0.000311687	0.0395276	1.4727
LUAD	uc003ysa.2	onco-lncRNA-40	KEAP1	0.187919	0.000114683	0.0458865	3.87923
CRC	ENST00000509399	onco-lncRNA-41	MLL3	0.07	0.000466898	0.0473689	3.29321
CRC	ENST00000509399	onco-lncRNA-41	USP9X	0.055	0.000542067	0.0498733	1.47818
HNSC	ENST00000509399	onco-lncRNA-41	NSD1	0.11	0.00138945	0.0402288	1.71336
HNSC	ENST00000509399	onco-lncRNA-41	TP53	0.71	9.41094e-06	0.000661723	2.04692
CRC	TCONS_l2_00004762	onco-lncRNA-43	ATR	0.08	0.000403473	0.0428389	0.562709
CRC	TCONS_l2_00004762	onco-lncRNA-43	EPHA3	0.095	0.000291408	0.0378153	0.536393
HNSC	TCONS_00000698	onco-lncRNA-45	CDKN2A	0.216667	0.00066725	0.0216066	1.36614
HNSC	TCONS_00000698	onco-lncRNA-45	TP53	0.71	1.53551e-13	4.72363e-11	2.14019
BRCA	ENST00000400831	onco-lncRNA-46	PIK3CA	0.33965	0.00573403	0.036389	0.082366
BRCA	ENST00000400831	onco-lncRNA-46	TP53	0.341108	5.96906e-08	1.51522e-06	19.9634
CRC	ENST00000400831	onco-lncRNA-46	TP53	0.515	0.00025672	0.0351416	1.31964
BRCA	ENST00000505089	onco-lncRNA-50	CDH1	0.0772595	0.00330901	0.0222852	1.2171
BRCA	ENST00000505089	onco-lncRNA-50	MAP3K1	0.0714286	0.00104247	0.0081908	1.17646
BRCA	ENST00000505089	onco-lncRNA-50	PIK3CA	0.33965	0.000505993	0.00438948	1.10613
BRCA	ENST00000505089	onco-lncRNA-50	TP53	0.341108	1.31243e-21	1.44367e-19	0.703475
HNSC	TCONS_00029630	onco-lncRNA-51	NSD1	0.11	2.19226e-05	0.00149865	1.96766
BRCA	TCONS_00010138	onco-lncRNA-57	TP53	0.341108	2.42706e-10	1.14418e-08	0.668717
HNSC	TCONS_l2_00029054	onco-lncRNA-58	AJUBA	0.0566667	0.00013402	0.0068713	0.315379
LUAD	TCONS_00020243	onco-lncRNA-59	TP53	0.503356	3.39877e-05	0.0189991	0.437643
BRCA	NR_033957	onco-lncRNA-70	GATA3	0.102041	0.00169804	0.0121816	0.265507
KIRC	ENST00000453666	onco-lncRNA-73	BAP1	0.0966767	5.29124e-09	3.78853e-06	0.245987
LUAD	ENST00000580756	onco-lncRNA-74	KEAP1	0.187919	2.55845e-05	0.0171621	0.426535
BRCA	ENST00000439707	onco-lncRNA-79	TP53	0.341108	1.57183e-09	5.18703e-08	6.71839
LUAD	TCONS_00017929	onco-lncRNA-81	TP53	0.503356	1.54938e-06	0.00519663	0.548277
BRCA	ENST00000556266	onco-lncRNA-82	CDH1	0.0772595	0.000518756	0.00438948	2.57338
BRCA	ENST00000556266	onco-lncRNA-82	MAP3K1	0.0714286	0.00138658	0.0101683	1.47251
BRCA	ENST00000556266	onco-lncRNA-82	PIK3CA	0.33965	1.61684e-05	0.000191083	0.820912
BRCA	ENST00000556266	onco-lncRNA-82	TP53	0.341108	4.96298e-06	7.44447e-05	0.750548
BRCA	ENST00000555928	onco-lncRNA-83	TP53	0.341108	0.00318946	0.0220707	0.872776
KIRC	uc002hng.1	onco-lncRNA-85	PBRM1	0.335347	1.86163e-05	0.00571254	0.231307
CRC	ENST00000563192	onco-lncRNA-86	ACVR2A	0.115	0.000486913	0.0485174	1.55108
CRC	ENST00000563192	onco-lncRNA-86	AXIN2	0.07	0.000168572	0.0285041	1.74302
HNSC	TCONS_00005366	onco-lncRNA-90	NSD1	0.11	7.98189e-08	7.27535e-06	18.0063
HNSC	ENST00000457364	onco-lncRNA-91	TP53	0.71	2.29921e-10	3.14353e-08	2.0995
HNSC	TCONS_l2_00017159	onco-lncRNA-93	CDKN2A	0.216667	0.000361945	0.0148458	1.55513
HNSC	TCONS_l2_00017159	onco-lncRNA-93	TP53	0.71	2.75694e-13	6.78483e-11	2.39641
HNSC	TCONS_00007922	onco-lncRNA-97	TP53	0.71	6.90394e-10	8.94242e-08	1.77705
HNSC	TCONS_00024510	onco-lncRNA-101	TP53	0.71	0.00138163	0.0402288	1.55026
HNSC	ENST00000443947	onco-lncRNA-102	CDKN2A	0.216667	0.000171778	0.00828914	1.50668
HNSC	ENST00000443947	onco-lncRNA-102	TP53	0.71	1.13379e-14	1.39513e-11	2.15754
HNSC	ENST00000512035	onco-lncRNA-106	TP53	0.71	2.35118e-08	2.31451e-06	2.03785
CRC	ENST00000444865	onco-lncRNA-108	KRAS	0.415	0.000246311	0.0351416	2.45683
HNSC	ENST00000444865	onco-lncRNA-108	TP53	0.71	0.000131479	0.0068713	1.87042
HNSC	ENST00000557518	onco-lncRNA-110	TP53	0.71	0.000533319	0.0189156	1.48721
HNSC	ENST00000439804	onco-lncRNA-113	NSD1	0.11	2.90193e-11	4.7611e-09	9.48091
HNSC	ENST00000439804	onco-lncRNA-113	TP53	0.71	0.000214655	0.0097827	2.1301
HNSC	ENST00000546784	onco-lncRNA-116	CDKN2A	0.216667	0.000337884	0.0148458	1.55011
HNSC	ENST00000546784	onco-lncRNA-116	TP53	0.71	2.1599e-12	4.08886e-10	2.33662
HNSC	ENST00000478294	onco-lncRNA-117	TP53	0.71	0.000648605	0.0215705	1.54312
HNSC	uc021qoj.1	onco-lncRNA-120	CDKN2A	0.216667	0.000344016	0.0148458	1.41884
HNSC	uc021qoj.1	onco-lncRNA-120	TP53	0.71	1.49279e-13	4.72363e-11	2.183
HNSC	ENST00000552324	onco-lncRNA-121	TP53	0.71	6.38267e-14	2.61796e-11	2.19601
HNSC	ENST00000419745	onco-lncRNA-122	CDKN2A	0.216667	0.000432305	0.0163677	1.42221
HNSC	ENST00000419745	onco-lncRNA-122	TP53	0.71	5.6509e-14	2.61796e-11	2.14602
BRCA	uc002jit.1	onco-lncRNA-126	PIK3CA	0.33965	0.00683457	0.0425549	0.578405
HNSC	TCONS_l2_00018982	onco-lncRNA-131	NOTCH1	0.206667	5.48643e-05	0.00346208	1.48176
HNSC	TCONS_00012368	onco-lncRNA-132	CDKN2A	0.216667	0.00041507	0.0159607	1.22147
HNSC	TCONS_00012368	onco-lncRNA-132	TP53	0.71	4.08558e-07	3.35154e-05	1.82953
BRCA	TCONS_00017736	onco-lncRNA-133	TP53	0.341108	9.91173e-09	2.72573e-07	2.80114
HNSC	TCONS_00017736	onco-lncRNA-133	CDKN2A	0.216667	0.00157026	0.044026	1.53007
HNSC	TCONS_00017736	onco-lncRNA-133	TP53	0.71	3.87044e-09	4.53578e-07	2.54094
BRCA	TCONS_l2_00005286	onco-lncRNA-135	TP53	0.341108	0.00704472	0.043051	1.13457
HNSC	TCONS_l2_00005286	onco-lncRNA-135	CDKN2A	0.216667	0.000538031	0.0189156	1.39031
HNSC	TCONS_l2_00005286	onco-lncRNA-135	NSD1	0.11	0.000963167	0.0292636	1.4247
HNSC	TCONS_l2_00005286	onco-lncRNA-135	TP53	0.71	4.86396e-13	1.0882e-10	1.96904
HNSC	TCONS_l2_00009437	onco-lncRNA-136	TP53	0.71	1.24814e-10	1.80687e-08	2.04695
BRCA	TCONS_00024663	onco-lncRNA-137	TP53	0.341108	8.40805e-09	2.52242e-07	0.799275
HNSC	TCONS_00029315	onco-lncRNA-138	NSD1	0.11	2.75813e-05	0.00178625	1.88692
LUSC	ENST00000589662	onco-lncRNA-140	TP53	0.824859	2.27623e-05	0.0450762	1.84399
BRCA	ENST00000423943	onco-lncRNA-141	GATA3	0.102041	0.000119436	0.00115923	0.140857
BRCA	ENST00000423943	onco-lncRNA-141	TP53	0.341108	4.47738e-13	3.69384e-11	3.77979
HNSC	TCONS_l2_00025701	onco-lncRNA-145	TP53	0.71	0.000280489	0.0125506	0.727104
HNSC	ENST00000574086	onco-lncRNA-147	AJUBA	0.0566667	0.000357368	0.0148458	0.280799
LUAD	TCONS_00004835	onco-lncRNA-148	TP53	0.503356	1.00426e-05	0.0112276	0.421507
HNSC	TCONS_l2_00003114	onco-lncRNA-157	CDKN2A	0.216667	0.00058931	0.0199546	0.307529
HNSC	TCONS_l2_00003114	onco-lncRNA-157	TP53	0.71	0.000835371	0.0256981	0.369817
BRCA	ENST00000423808	onco-lncRNA-169	TP53	0.341108	3.85466e-06	6.69493e-05	0.556061
HNSC	ENST00000423808	onco-lncRNA-169	EP300	0.08	0.000372741	0.015038	0.17022
CRC	ENST00000477643	onco-lncRNA-182	ACVR2A	0.115	1.8423e-05	0.0093455	0.308678
CRC	ENST00000477643	onco-lncRNA-182	ARID1A	0.115	0.00015008	0.0270144	0.411367
CRC	ENST00000477643	onco-lncRNA-182	BRAF	0.105	6.89181e-05	0.0203805	0.420077
CRC	ENST00000477643	onco-lncRNA-182	TGFBR2	0.11	0.000235581	0.0349615	0.366412
LUAD	TCONS_l2_00013871	onco-lncRNA-184	EGFR	0.161074	0.000131872	0.0458865	0.0703345
BRCA	TCONS_00009859	onco-lncRNA-185	TP53	0.341108	0.00137167	0.0101683	3.29143
CRC	TCONS_l2_00029476	onco-lncRNA-186	ACVR2A	0.115	0.000200614	0.0324092	1.29551
CRC	NR_045196	onco-lncRNA-195	ACVR2A	0.115	0.000279158	0.0370881	0.460787
CRC	NR_045196	onco-lncRNA-195	TGFBR2	0.11	0.000500668	0.0490127	0.473856
BRCA	uc011abu.2	onco-lncRNA-209	CDH1	0.0772595	0.000294428	0.00277603	0.883048
BRCA	uc011abu.2	onco-lncRNA-209	TP53	0.341108	7.45899e-10	3.07683e-08	0.432567
CRC	ENST00000580684	onco-lncRNA-212	ACVR2A	0.115	6.10733e-06	0.00567982	0.518747
CRC	ENST00000580684	onco-lncRNA-212	BRAF	0.105	7.34578e-06	0.00585564	0.494162
CRC	NR_024418	onco-lncRNA-215	ACVR2A	0.115	3.87231e-05	0.0180063	0.273187
CRC	NR_024418	onco-lncRNA-215	BRAF	0.105	0.000537724	0.0498733	0.367673
HNSC	ENST00000422780	onco-lncRNA-217	NSD1	0.11	8.50372e-09	8.71985e-07	12.0907
CRC	TCONS_00014977	onco-lncRNA-221	TGFBR2	0.11	0.000378471	0.0428389	0.39711
BRCA	TCONS_l2_00006118	onco-lncRNA-223	GATA3	0.102041	2.42392e-06	4.44385e-05	0.277509
BRCA	TCONS_l2_00006118	onco-lncRNA-223	PIK3CA	0.33965	0.000355518	0.00325892	0.381813
BRCA	TCONS_l2_00006118	onco-lncRNA-223	TP53	0.341108	1.36249e-12	8.99245e-11	3.60306
HNSC	uc001lsz.3	onco-lncRNA-226	NSD1	0.11	0.00136195	0.0402288	1.61289
BRCA	NR_034011	onco-lncRNA-228	CDH1	0.0772595	8.95279e-05	0.000895279	1.24133
BRCA	NR_034011	onco-lncRNA-228	TP53	0.341108	3.12165e-07	6.4384e-06	0.896582
LUSC	ENST00000420819		NFE2L2	0.141243	1.75006e-07	0.00159571	2.72863
CRC	ENST00000422022		TP53	0.515	1.44127e-05	0.00804231	1.47212
KIRC	ENST00000429578		PBRM1	0.335347	1.95479e-10	4.19889e-07	1.37085
HNSC	ENST00000434593		TP53	0.71	6.90811e-13	1.41674e-10	2.27276
KIRC	ENST00000451478		BAP1	0.0966767	5.33055e-06	0.00190834	0.282579
HNSC	ENST00000453988		CDKN2A	0.216667	0.000531918	0.0189156	1.33427
HNSC	ENST00000453988		TP53	0.71	8.23295e-09	8.71985e-07	1.76306
HNSC	ENST00000507296		CDKN2A	0.216667	6.96617e-05	0.0041814	1.51655
HNSC	ENST00000507296		TP53	0.71	2.84459e-14	1.75014e-11	2.18886
KIRC	ENST00000508564		PBRM1	0.335347	7.77251e-10	8.34767e-07	0.587307
CRC	ENST00000542586		ACVR2A	0.115	1.31194e-09	7.32064e-06	0.417326
CRC	ENST00000542586		APC	0.77	0.000554043	0.0498733	1.35679
CRC	ENST00000542586		ARID1A	0.115	0.000390953	0.0428389	0.630234
CRC	ENST00000542586		ATR	0.08	9.71741e-05	0.0203805	0.5625
CRC	ENST00000542586		BRAF	0.105	9.40103e-05	0.0203805	0.592906
CRC	ENST00000542586		EP300	0.07	5.71012e-05	0.0199141	0.488873
CRC	ENST00000542586		NCOR1	0.06	5.09761e-05	0.0189631	0.468617
CRC	ENST00000542586		SMC1A	0.05	0.000163437	0.0284992	0.439253
CRC	ENST00000542586		TGFBR2	0.11	1.17131e-05	0.0074302	0.552742
HNSC	ENST00000560238		TP53	0.71	3.83164e-06	0.000277343	1.77382
BRCA	ENST00000564830		PIK3CA	0.33965	4.30528e-12	2.36791e-10	1.62796
BRCA	ENST00000573341		MAP3K1	0.0714286	0.000731337	0.00603353	1.06041
BRCA	ENST00000573341		TP53	0.341108	4.82741e-07	9.37085e-06	0.944638
HNSC	ENST00000578285		TP53	0.71	0.000452758	0.0168824	0.624015
BRCA	ENST00000579012		GATA3	0.102041	0.00370285	0.0244388	0.00962359
BRCA	ENST00000579012		TP53	0.341108	8.44634e-08	1.99092e-06	0.772431
CRC	ENST00000582780		ACVR2A	0.115	9.27477e-05	0.0203805	0.401849
HNSC	ENST00000599803		CDKN2A	0.216667	0.000360693	0.0148458	1.38711
HNSC	ENST00000599803		TP53	0.71	1.72512e-14	1.41517e-11	2.25468
HNSC	NR_038433		TP53	0.71	0.000108943	0.00595798	0.216018
HNSC	NR_047508		NOTCH1	0.206667	0.000569415	0.019737	0.387383
HNSC	TCONS_00000870		TP53	0.71	5.06642e-08	4.79557e-06	1.63023
KIRC	TCONS_00000975		BAP1	0.0966767	0.000209312	0.0499558	0.213936
BRCA	TCONS_00010317		TP53	0.341108	1.19877e-09	4.3955e-08	0.460134
HNSC	TCONS_00013382		CDKN2A	0.216667	5.83231e-05	0.00358833	1.59444
HNSC	TCONS_00013382		TP53	0.71	1.00956e-10	1.55283e-08	2.02623
HNSC	TCONS_00019383		NOTCH1	0.206667	0.000178924	0.0083801	0.523044
HNSC	TCONS_00019632		CDKN2A	0.216667	0.000154102	0.00758492	1.53672
HNSC	TCONS_00019632		TP53	0.71	2.10127e-13	5.7458e-11	2.37562
CRC	TCONS_00019766		ACVR2A	0.115	0.000554147	0.0498733	0.285279
HNSC	TCONS_00019767		NSD1	0.11	9.18036e-05	0.00527853	0.51705
CRC	TCONS_00020991		ACVR2A	0.115	1.19842e-05	0.0074302	0.239484
CRC	TCONS_00020991		TGFBR2	0.11	0.000102268	0.0203805	0.30532
BRCA	TCONS_00021458		TP53	0.341108	7.06606e-06	9.71583e-05	0.853557
HNSC	TCONS_00022475		NOTCH1	0.206667	0.000685635	0.0219136	0.544067
CRC	TCONS_00023060		TGFBR2	0.11	0.000203283	0.0324092	0.423359
CRC	TCONS_00025506		ACVR2A	0.115	9.39455e-05	0.0203805	0.132743
CRC	TCONS_00025506		ARID1A	0.115	6.22847e-05	0.0203805	0.229102
CRC	TCONS_00025506		EPHA3	0.095	0.000219096	0.0339599	0.339075
CRC	TCONS_00025506		FBXW7	0.185	0.000403439	0.0428389	0.343074
CRC	TCONS_00025506		LRRK2	0.085	0.000355045	0.0428389	0.100588
CRC	TCONS_00025506		TGFBR2	0.11	0.000131774	0.02451	0.13351
LUSC	TCONS_00025791		NFE2L2	0.141243	3.01089e-05	0.0457554	0.303577
BRCA	TCONS_00079056_HOTAIR		CDH1	0.0772595	0.0012997	0.00997444	1.51091
BRCA	TCONS_00079056_HOTAIR		PIK3CA	0.33965	1.62131e-05	0.000191083	1.40948
BRCA	TCONS_00079056_HOTAIR		TP53	0.341108	3.58534e-05	0.000394388	1.23335
BRCA	TCONS_l2_00003637		CDH1	0.0772595	0.000457264	0.0040783	1.1877
CRC	TCONS_l2_00016266		ACVR2A	0.115	1.30893e-08	3.65193e-05	0.314145
CRC	TCONS_l2_00016266		ARID1A	0.115	0.000429556	0.0443874	0.599418
CRC	TCONS_l2_00016266		ATR	0.08	9.99191e-05	0.0203805	0.37695
CRC	TCONS_l2_00016266		BRAF	0.105	4.88673e-05	0.0189631	0.469145
CRC	TCONS_l2_00016266		EP300	0.07	0.000126614	0.0243622	0.365871
CRC	TCONS_l2_00016266		FBXW7	0.185	4.60879e-07	0.000642926	0.494028
CRC	TCONS_l2_00016266		MLL2	0.08	9.44993e-05	0.0203805	0.367813
CRC	TCONS_l2_00016266		PIK3CA	0.195	0.000258209	0.0351416	0.563794
CRC	TCONS_l2_00016266		TGFBR2	0.11	1.26261e-06	0.00140907	0.368035
CRC	TCONS_l2_00016266		TP53	0.515	2.93407e-08	5.45738e-05	1.74585
HNSC	TCONS_l2_00017132		TP53	0.71	0.000591908	0.0199546	0.544827
HNSC	TCONS_l2_00019587		NAV3	0.0966667	0.00157427	0.044026	0.222022
KIRC	TCONS_l2_00025081		BAP1	0.0966767	6.66558e-07	0.000286353	0.313767
CRC	TCONS_l2_00029136		TP53	0.515	4.40889e-05	0.0189243	0.648615
BRCA	uc001iun.2		TP53	0.341108	7.99447e-06	0.000105527	1.25939
KIRC	uc001ldf.3		BAP1	0.0966767	2.83546e-07	0.000152264	0.406109
KIRC	uc001ldf.3		PBRM1	0.335347	0.000154933	0.0415996	1.30549
LUSC	uc002zbk.2		NFE2L2	0.141243	2.47183e-05	0.0450762	0.279657

## Sheet: SuppTable10
Supplementary Table 10 | Transcription Factor Binding Sites (TFBS) within 500 nt upstream of onco-lncRNAs that are significantly associated with at least one mutation.
Onco-lncRNA ID	Transcript ID	hg19 Coordinates	Strand	TFBS	TFBS Coordinates	TFBS Strand
onco-lncRNA-1	uc011ara.2	chr22:46726771-46729595	+	OCT1	chr22:46726601-46726613	+
onco-lncRNA-1	uc011ara.2	chr22:46726771-46729595	+	CDC5	chr22:46726664-46726676	+
onco-lncRNA-3	NR_033849	chr8:144816309-144828507	+	SRF	chr8:144815853-144815868	+
onco-lncRNA-3	NR_033849	chr8:144816309-144828507	+	PAX5	chr8:144815895-144815923	+
onco-lncRNA-3	NR_033849	chr8:144816309-144828507	+	AP2	chr8:144815909-144815921	+
onco-lncRNA-3	NR_033849	chr8:144816309-144828507	+	AP2	chr8:144815980-144815992	+
onco-lncRNA-3	NR_033849	chr8:144816309-144828507	+	RREB1	chr8:144815987-144816001	+
onco-lncRNA-3	NR_033849	chr8:144816309-144828507	+	COUP	chr8:144816264-144816278	+
onco-lncRNA-3	NR_033849	chr8:144816309-144828507	+	ELK1	chr8:144816271-144816285	+
onco-lncRNA-3	NR_033849	chr8:144816309-144828507	+	CETS1P54	chr8:144816274-144816284	+
onco-lncRNA-3	NR_033849	chr8:144816309-144828507	+	NRF2	chr8:144816274-144816284	+
onco-lncRNA-3	NR_033849	chr8:144816309-144828507	+	RFX1	chr8:144816307-144816324	+
onco-lncRNA-3	NR_033849	chr8:144816309-144828507	+	MIF1	chr8:144816307-144816325	+
onco-lncRNA-11	ENST00000415479.1	chr2:216582765-216584147	+	GATA1	chr2:216582306-216582319	+
onco-lncRNA-11	ENST00000415479.1	chr2:216582765-216584147	+	LMO2COM	chr2:216582308-216582317	+
onco-lncRNA-11	ENST00000415479.1	chr2:216582765-216584147	+	FOXJ2	chr2:216582346-216582360	+
onco-lncRNA-11	ENST00000415479.1	chr2:216582765-216584147	+	MEIS1AHOXA9	chr2:216582350-216582364	+
onco-lncRNA-11	ENST00000415479.1	chr2:216582765-216584147	+	STAT	chr2:216582368-216582377	+
onco-lncRNA-11	ENST00000415479.1	chr2:216582765-216584147	+	FOXO3	chr2:216582690-216582704	+
onco-lncRNA-11	ENST00000415479.1	chr2:216582765-216584147	+	FOXO4	chr2:216582690-216582704	+
onco-lncRNA-15	NR_110468	chr2:177037916-177042857	-	MEF2	chr2:177043100-177043122	-
onco-lncRNA-15	NR_110468	chr2:177037916-177042857	-	NKX25	chr2:177043105-177043113	-
onco-lncRNA-15	NR_110468	chr2:177037916-177042857	-	E2F	chr2:177043135-177043150	-
onco-lncRNA-15	NR_110468	chr2:177037916-177042857	-	MYOGNF1	chr2:177043184-177043213	-
onco-lncRNA-17	ENST00000609300	chr20:22541429-22544906	-	OLF1	chr20:22545053-22545075	-
onco-lncRNA-17	ENST00000609300	chr20:22541429-22544906	-	COUP	chr20:22545079-22545093	-
onco-lncRNA-23	TCONS_00024657	chr16:53073298-53078119	-	CEBPB	chr16:53078579-53078593	-
onco-lncRNA-24	TCONS_00025560	chr17:10698226-10707020	-	IK3	chr17:10707141-10707154	-
onco-lncRNA-24	TCONS_00025560	chr17:10698226-10707020	-	E47	chr17:10707299-10707314	-
onco-lncRNA-24	TCONS_00025560	chr17:10698226-10707020	-	AREB6	chr17:10707301-10707313	-
onco-lncRNA-24	TCONS_00025560	chr17:10698226-10707020	-	BRACH	chr17:10707305-10707329	-
onco-lncRNA-24	TCONS_00025560	chr17:10698226-10707020	-	P300	chr17:10707306-10707320	-
onco-lncRNA-24	TCONS_00025560	chr17:10698226-10707020	-	MYCMAX	chr17:10707418-10707438	-
onco-lncRNA-24	TCONS_00025560	chr17:10698226-10707020	-	XBP1	chr17:10707419-10707436	-
onco-lncRNA-24	TCONS_00025560	chr17:10698226-10707020	-	GR	chr17:10707419-10707438	-
onco-lncRNA-24	TCONS_00025560	chr17:10698226-10707020	-	ARNT	chr17:10707420-10707436	-
onco-lncRNA-24	TCONS_00025560	chr17:10698226-10707020	-	MAX	chr17:10707421-10707435	-
onco-lncRNA-24	TCONS_00025560	chr17:10698226-10707020	-	NMYC	chr17:10707422-10707434	-
onco-lncRNA-24	TCONS_00025560	chr17:10698226-10707020	-	USF	chr17:10707424-10707432	-
onco-lncRNA-24	TCONS_00025560	chr17:10698226-10707020	-	HNF1	chr17:10707464-10707481	-
onco-lncRNA-24	TCONS_00025560	chr17:10698226-10707020	-	HFH1	chr17:10707506-10707518	-
onco-lncRNA-24	TCONS_00025560	chr17:10698226-10707020	-	AREB6	chr17:10707507-10707516	-
onco-lncRNA-25	NR_026860	chr6:166352947-166401527	-	RFX1	chr6:166401628-166401646	-
onco-lncRNA-25	NR_026860	chr6:166352947-166401527	-	CREBP1	chr6:166401684-166401696	-
onco-lncRNA-25	NR_026860	chr6:166352947-166401527	-	TAXCREB	chr6:166401685-166401700	-
onco-lncRNA-25	NR_026860	chr6:166352947-166401527	-	CREBP1CJUN	chr6:166401686-166401694	-
onco-lncRNA-25	NR_026860	chr6:166352947-166401527	-	PAX5	chr6:166401725-166401753	-
onco-lncRNA-25	NR_026860	chr6:166352947-166401527	-	P300	chr6:166401733-166401747	-
onco-lncRNA-25	NR_026860	chr6:166352947-166401527	-	EGR1	chr6:166401736-166401748	-
onco-lncRNA-25	NR_026860	chr6:166352947-166401527	-	EGR2	chr6:166401736-166401748	-
onco-lncRNA-25	NR_026860	chr6:166352947-166401527	-	EGR3	chr6:166401736-166401748	-
onco-lncRNA-25	NR_026860	chr6:166352947-166401527	-	NGFIC	chr6:166401736-166401748	-
onco-lncRNA-25	NR_026860	chr6:166352947-166401527	-	ARNT	chr6:166401738-166401758	-
onco-lncRNA-25	NR_026860	chr6:166352947-166401527	-	HMX1	chr6:166401741-166401751	-
onco-lncRNA-25	NR_026860	chr6:166352947-166401527	-	CMYB	chr6:166401741-166401759	-
onco-lncRNA-25	NR_026860	chr6:166352947-166401527	-	LMO2COM	chr6:166401742-166401754	-
onco-lncRNA-25	NR_026860	chr6:166352947-166401527	-	PAX4	chr6:166401829-166401859	-
onco-lncRNA-25	NR_026860	chr6:166352947-166401527	-	RSRFC4	chr6:166401872-166401888	-
onco-lncRNA-25	NR_026860	chr6:166352947-166401527	-	HNF3B	chr6:166401874-166401889	-
onco-lncRNA-28	TCONS_00019596	chr11:27238616-27240219	-	HSF2	chr11:27240285-27240295	-
onco-lncRNA-29	TCONS_00020864	chr12:89175622-89177236	-	POU3F2	chr12:89177298-89177312	-
onco-lncRNA-29	TCONS_00020864	chr12:89175622-89177236	-	LHX3	chr12:89177681-89177691	-
onco-lncRNA-30	NR_103783	chr1:205404013-205425214	-	NFY	chr1:205425246-205425260	-
onco-lncRNA-30	NR_103783	chr1:205404013-205425214	-	CDPCR1	chr1:205425251-205425261	-
onco-lncRNA-30	NR_103783	chr1:205404013-205425214	-	PPARG	chr1:205425271-205425292	-
onco-lncRNA-30	NR_103783	chr1:205404013-205425214	-	CART1	chr1:205425334-205425352	-
onco-lncRNA-30	NR_103783	chr1:205404013-205425214	-	STAT	chr1:205425376-205425385	-
onco-lncRNA-34	TCONS_00004507	chr2:177494331-177502323	-	HMX1	chr2:177502623-177502633	-
onco-lncRNA-38	ENST00000440326	chr2:208104373-208110312	+	CEBP	chr2:208104030-208104043	+
onco-lncRNA-38	ENST00000440326	chr2:208104373-208110312	+	AML1	chr2:208104032-208104038	+
onco-lncRNA-38	ENST00000440326	chr2:208104373-208110312	+	COMP1	chr2:208104052-208104076	+
onco-lncRNA-38	ENST00000440326	chr2:208104373-208110312	+	BACH1	chr2:208104072-208104087	+
onco-lncRNA-38	ENST00000440326	chr2:208104373-208110312	+	BRN2	chr2:208104072-208104088	+
onco-lncRNA-38	ENST00000440326	chr2:208104373-208110312	+	BACH2	chr2:208104074-208104085	+
onco-lncRNA-38	ENST00000440326	chr2:208104373-208110312	+	PBX1	chr2:208104075-208104084	+
onco-lncRNA-38	ENST00000440326	chr2:208104373-208110312	+	NFE2	chr2:208104343-208104354	+
onco-lncRNA-40	uc003ysa.2	chr8:128219628-128231333	-	FREAC2	chr8:128231359-128231375	-
onco-lncRNA-40	uc003ysa.2	chr8:128219628-128231333	-	FREAC3	chr8:128231359-128231375	-
onco-lncRNA-40	uc003ysa.2	chr8:128219628-128231333	-	FREAC4	chr8:128231359-128231375	-
onco-lncRNA-40	uc003ysa.2	chr8:128219628-128231333	-	P53	chr8:128231512-128231522	-
onco-lncRNA-40	uc003ysa.2	chr8:128219628-128231333	-	MEF2	chr8:128231648-128231664	-
onco-lncRNA-40	uc003ysa.2	chr8:128219628-128231333	-	SOX5	chr8:128231652-128231662	-
onco-lncRNA-42	TCONS_00009975	chr5:59784030-59785670	+	PBX1	chr5:59783666-59783675	+
onco-lncRNA-42	TCONS_00009975	chr5:59784030-59785670	+	42278	chr5:59783839-59783854	+
onco-lncRNA-42	TCONS_00009975	chr5:59784030-59785670	+	NFY	chr5:59783945-59783956	+
onco-lncRNA-47	ENST00000433510.2	chr17:46713284-46724385	-	BRACH	chr17:46724703-46724727	-
onco-lncRNA-47	ENST00000433510.2	chr17:46713284-46724385	-	HOXA3	chr17:46724784-46724793	-
onco-lncRNA-47	ENST00000433510.2	chr17:46713284-46724385	-	SPZ1	chr17:46724817-46724832	-
onco-lncRNA-51	TCONS_00029630	chr22:50984903-50986244	+	SRF	chr22:50984561-50984576	+
onco-lncRNA-51	TCONS_00029630	chr22:50984903-50986244	+	E2F	chr22:50984807-50984819	+
onco-lncRNA-51	TCONS_00029630	chr22:50984903-50986244	+	PAX2	chr22:50984867-50984886	+
onco-lncRNA-56	TCONS_l2_00022885	chr5:44742519-44808883	-	NFY	chr5:44808906-44808917	-
onco-lncRNA-56	TCONS_l2_00022885	chr5:44742519-44808883	-	CDPCR1	chr5:44808990-44809000	-
onco-lncRNA-56	TCONS_l2_00022885	chr5:44742519-44808883	-	NFY	chr5:44808990-44809001	-
onco-lncRNA-56	TCONS_l2_00022885	chr5:44742519-44808883	-	YY1	chr5:44809054-44809074	-
onco-lncRNA-56	TCONS_l2_00022885	chr5:44742519-44808883	-	TCF11	chr5:44809206-44809219	-
onco-lncRNA-56	TCONS_l2_00022885	chr5:44742519-44808883	-	PAX5	chr5:44809254-44809282	-
onco-lncRNA-56	TCONS_l2_00022885	chr5:44742519-44808883	-	AHRARNT	chr5:44809255-44809274	-
onco-lncRNA-56	TCONS_l2_00022885	chr5:44742519-44808883	-	AHRARNT	chr5:44809271-44809287	-
onco-lncRNA-60	TCONS_00021896	chr13:107279239-107284309	+	FOXO1	chr13:107278786-107278800	+
onco-lncRNA-62	TCONS_00023441	chr15:63723373-63730499	+	POU3F2	chr15:63723056-63723066	+
onco-lncRNA-62	TCONS_00023441	chr15:63723373-63730499	+	HNF3B	chr15:63723154-63723169	+
onco-lncRNA-62	TCONS_00023441	chr15:63723373-63730499	+	FOXO1	chr15:63723155-63723169	+
onco-lncRNA-62	TCONS_00023441	chr15:63723373-63730499	+	FOXO3	chr15:63723155-63723169	+
onco-lncRNA-62	TCONS_00023441	chr15:63723373-63730499	+	HFH1	chr15:63723156-63723168	+
onco-lncRNA-62	TCONS_00023441	chr15:63723373-63730499	+	HFH3	chr15:63723156-63723169	+
onco-lncRNA-62	TCONS_00023441	chr15:63723373-63730499	+	CREBP1	chr15:63723162-63723170	+
onco-lncRNA-62	TCONS_00023441	chr15:63723373-63730499	+	OCT1	chr15:63723194-63723209	+
onco-lncRNA-63	TCONS_l2_00009224	chr15:80487819-80544417	-	PPARG	chr15:80544571-80544588	-
onco-lncRNA-63	TCONS_l2_00009224	chr15:80487819-80544417	-	TATA	chr15:80544573-80544588	-
onco-lncRNA-63	TCONS_l2_00009224	chr15:80487819-80544417	-	TATA	chr15:80544579-80544589	-
onco-lncRNA-64	TCONS_00025721	chr17:59470732-59475416	-	CHOP	chr17:59475855-59475868	-
onco-lncRNA-68	ENST00000457989	chr12:40550040-40561414	+	MEF2	chr12:40549569-40549585	+
onco-lncRNA-68	ENST00000457989	chr12:40550040-40561414	+	AREB6	chr12:40549937-40549949	+
onco-lncRNA-68	ENST00000457989	chr12:40550040-40561414	+	E47	chr12:40550007-40550022	+
onco-lncRNA-71	NR_024283	chr9:35909479-35911617	+	GATA1	chr9:35909356-35909370	+
onco-lncRNA-71	NR_024283	chr9:35909479-35911617	+	E47	chr9:35909443-35909459	+
onco-lncRNA-71	NR_024283	chr9:35909479-35911617	+	AP4	chr9:35909446-35909456	+
onco-lncRNA-72	uc010irg.3	chr4:174451608-174462981	+	CDC5	chr4:174451398-174451410	+
onco-lncRNA-72	uc010irg.3	chr4:174451608-174462981	+	HNF1	chr4:174451399-174451414	+
onco-lncRNA-72	uc010irg.3	chr4:174451608-174462981	+	SP1	chr4:174451445-174451458	+
onco-lncRNA-72	uc010irg.3	chr4:174451608-174462981	+	FOXJ2	chr4:174451469-174451483	+
onco-lncRNA-72	uc010irg.3	chr4:174451608-174462981	+	FOXO1	chr4:174451482-174451496	+
onco-lncRNA-72	uc010irg.3	chr4:174451608-174462981	+	FOXO4	chr4:174451482-174451496	+
onco-lncRNA-72	uc010irg.3	chr4:174451608-174462981	+	XBP1	chr4:174451485-174451502	+
onco-lncRNA-72	uc010irg.3	chr4:174451608-174462981	+	EVI1	chr4:174451541-174451552	+
onco-lncRNA-80	NR_024371	chr1:2980635-2984289	-	ZIC3	chr1:2984554-2984563	-
onco-lncRNA-80	NR_024371	chr1:2980635-2984289	-	E47	chr1:2984654-2984670	-
onco-lncRNA-80	NR_024371	chr1:2980635-2984289	-	LMO2COM	chr1:2984656-2984668	-
onco-lncRNA-80	NR_024371	chr1:2980635-2984289	-	MYOD	chr1:2984656-2984668	-
onco-lncRNA-80	NR_024371	chr1:2980635-2984289	-	LMO2COM	chr1:2984688-2984700	-
onco-lncRNA-82	ENST00000556266	chr14:102023640-102025113	-	LYF1	chr14:102025448-102025457	-
onco-lncRNA-83	ENST00000555928	chr14:101297817-101327363	+	P53	chr14:101297771-101297781	+
onco-lncRNA-85	uc002hng.1	chr17:35289408-35293921	-	NFY	chr17:35294012-35294023	-
onco-lncRNA-85	uc002hng.1	chr17:35289408-35293921	-	CREBP1CJUN	chr17:35294033-35294041	-
onco-lncRNA-85	uc002hng.1	chr17:35289408-35293921	-	AP2	chr17:35294036-35294048	-
onco-lncRNA-85	uc002hng.1	chr17:35289408-35293921	-	ARP1	chr17:35294064-35294080	-
onco-lncRNA-85	uc002hng.1	chr17:35289408-35293921	-	CMYB	chr17:35294078-35294096	-
onco-lncRNA-85	uc002hng.1	chr17:35289408-35293921	-	E2F	chr17:35294221-35294233	-
onco-lncRNA-85	uc002hng.1	chr17:35289408-35293921	-	GFI1	chr17:35294365-35294389	-
onco-lncRNA-86	ENST00000563192.1	chr16:2204797-2205359	-	STAT5A	chr16:2205475-2205490	-
onco-lncRNA-86	ENST00000563192.1	chr16:2204797-2205359	-	PPARG	chr16:2205752-2205769	-
onco-lncRNA-86	ENST00000563192.1	chr16:2204797-2205359	-	ELK1	chr16:2205756-2205772	-
onco-lncRNA-86	ENST00000563192.1	chr16:2204797-2205359	-	CETS1P54	chr16:2205759-2205769	-
onco-lncRNA-86	ENST00000563192.1	chr16:2204797-2205359	-	NRF2	chr16:2205759-2205769	-
onco-lncRNA-93	TCONS_l2_00017159	chr21:19093367-19110972	-	EVI1	chr21:19111439-19111455	-
onco-lncRNA-94	TCONS_00001511	chr1:61053728-61088212	-	EVI1	chr1:61088454-61088469	-
onco-lncRNA-95	TCONS_l2_00001306	chr1:83485231-83568608	-	ISRE	chr1:83568687-83568702	-
onco-lncRNA-95	TCONS_l2_00001306	chr1:83485231-83568608	-	OCT1	chr1:83568690-83568704	-
onco-lncRNA-95	TCONS_l2_00001306	chr1:83485231-83568608	-	NKX61	chr1:83568779-83568792	-
onco-lncRNA-95	TCONS_l2_00001306	chr1:83485231-83568608	-	MEF2	chr1:83568960-83568982	-
onco-lncRNA-96	TCONS_00000371	chr1:202780089-202781041	+	HOX13	chr1:202779700-202779730	+
onco-lncRNA-96	TCONS_00000371	chr1:202780089-202781041	+	EGR1	chr1:202779916-202779928	+
onco-lncRNA-96	TCONS_00000371	chr1:202780089-202781041	+	EGR2	chr1:202779916-202779928	+
onco-lncRNA-96	TCONS_00000371	chr1:202780089-202781041	+	PAX5	chr1:202780019-202780047	+
onco-lncRNA-96	TCONS_00000371	chr1:202780089-202781041	+	EGR1	chr1:202780026-202780038	+
onco-lncRNA-96	TCONS_00000371	chr1:202780089-202781041	+	SP1	chr1:202780029-202780042	+
onco-lncRNA-96	TCONS_00000371	chr1:202780089-202781041	+	MAZR	chr1:202780030-202780043	+
onco-lncRNA-96	TCONS_00000371	chr1:202780089-202781041	+	OLF1	chr1:202780070-202780092	+
onco-lncRNA-96	TCONS_00000371	chr1:202780089-202781041	+	HEN1	chr1:202780081-202780103	+
onco-lncRNA-96	TCONS_00000371	chr1:202780089-202781041	+	MIF1	chr1:202780086-202780104	+
onco-lncRNA-99	TCONS_00014973	chr8:37264138-37351380	-	GATA1	chr8:37351587-37351601	-
onco-lncRNA-103	uc021wad.1	chr20:4100588-4124836	+	CEBPB	chr20:4100374-4100388	+
onco-lncRNA-103	uc021wad.1	chr20:4100588-4124836	+	PAX2	chr20:4100579-4100588	+
onco-lncRNA-105	ENST00000559321	chr15:97954484-97975324	+	E4BP4	chr15:97954058-97954070	+
onco-lncRNA-105	ENST00000559321	chr15:97954484-97975324	+	HFH3	chr15:97954075-97954088	+
onco-lncRNA-105	ENST00000559321	chr15:97954484-97975324	+	PBX1	chr15:97954199-97954214	+
onco-lncRNA-105	ENST00000559321	chr15:97954484-97975324	+	CEBPB	chr15:97954212-97954226	+
onco-lncRNA-105	ENST00000559321	chr15:97954484-97975324	+	CREBP1	chr15:97954262-97954274	+
onco-lncRNA-105	ENST00000559321	chr15:97954484-97975324	+	FREAC7	chr15:97954344-97954360	+
onco-lncRNA-105	ENST00000559321	chr15:97954484-97975324	+	CEBPB	chr15:97954370-97954384	+
onco-lncRNA-105	ENST00000559321	chr15:97954484-97975324	+	PBX1	chr15:97954392-97954407	+
onco-lncRNA-105	ENST00000559321	chr15:97954484-97975324	+	NKX61	chr15:97954411-97954424	+
onco-lncRNA-105	ENST00000559321	chr15:97954484-97975324	+	EVI1	chr15:97954434-97954445	+
onco-lncRNA-105	ENST00000559321	chr15:97954484-97975324	+	HNF3B	chr15:97954475-97954490	+
onco-lncRNA-107	NR_026878	chr1:47897806-47900313	-	MEIS1AHOXA9	chr1:47900586-47900600	-
onco-lncRNA-111	NR_103549	chr5:90606730-90610219	-	FREAC4	chr5:90610235-90610251	-
onco-lncRNA-111	NR_103549	chr5:90606730-90610219	-	BACH1	chr5:90610260-90610275	-
onco-lncRNA-111	NR_103549	chr5:90606730-90610219	-	BACH2	chr5:90610262-90610273	-
onco-lncRNA-111	NR_103549	chr5:90606730-90610219	-	NFE2	chr5:90610263-90610274	-
onco-lncRNA-116	ENST00000546784.2	chr14:45846470-45858489	+	OCT1	chr14:45846285-45846300	+
onco-lncRNA-116	ENST00000546784.2	chr14:45846470-45858489	+	E4BP4	chr14:45846375-45846387	+
onco-lncRNA-117	ENST00000478294.1	chr10:5636953-5638081	-	BACH2	chr10:5638131-5638142	-
onco-lncRNA-117	ENST00000478294.1	chr10:5636953-5638081	-	AP1	chr10:5638132-5638141	-
onco-lncRNA-118	ENST00000554032	chr14:71276921-71282108	+	E47	chr14:71276557-71276572	+
onco-lncRNA-124	TCONS_00022099	chr13:100738208-100741196	-	TAXCREB	chr13:100741379-100741394	-
onco-lncRNA-126	uc002jit.1	chr17:70026956-70035822	+	PPARG	chr17:70026629-70026650	+
onco-lncRNA-126	uc002jit.1	chr17:70026956-70035822	+	SPZ1	chr17:70026743-70026758	+
onco-lncRNA-126	uc002jit.1	chr17:70026956-70035822	+	STAT1	chr17:70026758-70026779	+
onco-lncRNA-127	NR_026690	chr7:73149398-73150330	+	IK3	chr7:73149308-73149321	+
onco-lncRNA-129	ENST00000413290.1	chr2:196313255-196343649	+	LHX3	chr2:196312761-196312771	+
onco-lncRNA-137	TCONS_00024663	chr16:54952844-54962691	-	CREBP1	chr16:54963146-54963154	-
onco-lncRNA-137	TCONS_00024663	chr16:54952844-54962691	-	CREB	chr16:54963146-54963154	-
onco-lncRNA-139	ENST00000538734	chr15:89921346-89939471	+	AML1	chr15:89921136-89921142	+
onco-lncRNA-144	TCONS_00014250	chr7:7591940-7606158	-	SP1	chr7:7606456-7606469	-
onco-lncRNA-144	TCONS_00014250	chr7:7591940-7606158	-	ER	chr7:7606587-7606606	-
onco-lncRNA-144	TCONS_00014250	chr7:7591940-7606158	-	AP2	chr7:7606639-7606651	-
onco-lncRNA-145	TCONS_l2_00025701	chr7:20257233-20261304	+	SEF1	chr7:20256912-20256931	+
onco-lncRNA-145	TCONS_l2_00025701	chr7:20257233-20261304	+	MRF2	chr7:20257129-20257143	+
onco-lncRNA-145	TCONS_l2_00025701	chr7:20257233-20261304	+	PAX4	chr7:20257131-20257161	+
onco-lncRNA-148	TCONS_00004835	chr2:85938745-85943145	+	SRY	chr2:85938486-85938493	+
onco-lncRNA-153	TCONS_00012018	chr6:168152125-168152763	+	HLF	chr6:168151965-168151975	+
onco-lncRNA-153	TCONS_00012018	chr6:168152125-168152763	+	CREBP1	chr6:168151966-168151974	+
onco-lncRNA-157	TCONS_l2_00003114	chr10:77118801-77121383	+	SPZ1	chr10:77118321-77118336	+
onco-lncRNA-157	TCONS_l2_00003114	chr10:77118801-77121383	+	ROAZ	chr10:77118569-77118583	+
onco-lncRNA-157	TCONS_l2_00003114	chr10:77118801-77121383	+	NFAT	chr10:77118691-77118703	+
onco-lncRNA-157	TCONS_l2_00003114	chr10:77118801-77121383	+	SRF	chr10:77118786-77118800	+
onco-lncRNA-157	TCONS_l2_00003114	chr10:77118801-77121383	+	HMX1	chr10:77118789-77118799	+
onco-lncRNA-158	TCONS_l2_00004589	chr11:66176791-66184301	+	ZID	chr11:66176433-66176446	+
onco-lncRNA-158	TCONS_l2_00004589	chr11:66176791-66184301	+	CREB	chr11:66176515-66176527	+
onco-lncRNA-158	TCONS_l2_00004589	chr11:66176791-66184301	+	ATF	chr11:66176516-66176530	+
onco-lncRNA-158	TCONS_l2_00004589	chr11:66176791-66184301	+	CREBP1	chr11:66176517-66176529	+
onco-lncRNA-158	TCONS_l2_00004589	chr11:66176791-66184301	+	CREBP1CJUN	chr11:66176519-66176527	+
onco-lncRNA-158	TCONS_l2_00004589	chr11:66176791-66184301	+	MIF1	chr11:66176621-66176639	+
onco-lncRNA-158	TCONS_l2_00004589	chr11:66176791-66184301	+	MYB	chr11:66176630-66176640	+
onco-lncRNA-160	TCONS_00022469	chr14:36690499-36704816	+	MEF2	chr14:36690145-36690167	+
onco-lncRNA-160	TCONS_00022469	chr14:36690499-36704816	+	CEBP	chr14:36690156-36690170	+
onco-lncRNA-160	TCONS_00022469	chr14:36690499-36704816	+	HNF3B	chr14:36690327-36690342	+
onco-lncRNA-160	TCONS_00022469	chr14:36690499-36704816	+	HOXA3	chr14:36690330-36690339	+
onco-lncRNA-160	TCONS_00022469	chr14:36690499-36704816	+	CREBP1	chr14:36690424-36690432	+
onco-lncRNA-160	TCONS_00022469	chr14:36690499-36704816	+	FAC1	chr14:36690431-36690445	+
onco-lncRNA-160	TCONS_00022469	chr14:36690499-36704816	+	MRF2	chr14:36690431-36690445	+
onco-lncRNA-160	TCONS_00022469	chr14:36690499-36704816	+	SOX5	chr14:36690474-36690484	+
onco-lncRNA-160	TCONS_00022469	chr14:36690499-36704816	+	RFX1	chr14:36690483-36690501	+
onco-lncRNA-161	TCONS_00022803	chr14:77540151-77542695	-	GRE	chr14:77542785-77542801	-
onco-lncRNA-161	TCONS_00022803	chr14:77540151-77542695	-	CREB	chr14:77542861-77542873	-
onco-lncRNA-163	TCONS_00024586	chr16:14100905-14109857	-	AP1	chr16:14110000-14110013	-
onco-lncRNA-168	ENST00000425887.2	chr2:96331831-96334463	+	SRY	chr2:96331464-96331476	+
onco-lncRNA-170	ENST00000416553	chr11:131123316-131170666	+	MIF1	chr11:131123155-131123173	+
onco-lncRNA-170	ENST00000416553	chr11:131123316-131170666	+	CEBP	chr11:131123204-131123217	+
onco-lncRNA-170	ENST00000416553	chr11:131123316-131170666	+	AML1	chr11:131123256-131123262	+
onco-lncRNA-170	ENST00000416553	chr11:131123316-131170666	+	AML1	chr11:131123285-131123291	+
onco-lncRNA-173	NR_024129	chr9:98782013-98784037	-	NF1	chr9:98784341-98784359	-
onco-lncRNA-173	NR_024129	chr9:98782013-98784037	-	RFX1	chr9:98784482-98784499	-
onco-lncRNA-173	NR_024129	chr9:98782013-98784037	-	CDP	chr9:98784508-98784523	-
onco-lncRNA-174	NR_024065	chr3:8613467-8616354	+	HOX13	chr3:8613111-8613141	+
onco-lncRNA-174	NR_024065	chr3:8613467-8616354	+	CREBP1	chr3:8613309-8613317	+
onco-lncRNA-175	NR_103859	chr16:86229786-86233324	+	SRF	chr16:86229457-86229475	+
onco-lncRNA-175	NR_103859	chr16:86229786-86233324	+	TATA	chr16:86229613-86229623	+
onco-lncRNA-175	NR_103859	chr16:86229786-86233324	+	AP4	chr16:86229675-86229685	+
onco-lncRNA-177	NR_109861	chr20:9966980-9987764	+	OCT	chr20:9966660-9966673	+
onco-lncRNA-177	NR_109861	chr20:9966980-9987764	+	CEBPB	chr20:9966669-9966683	+
onco-lncRNA-179	ENST00000573270.1	chr17:4513743-4520945	+	MSX1	chr17:4513252-4513261	+
onco-lncRNA-180	ENST00000508512	chr5:66759636-66771305	-	RORA2	chr5:66771415-66771428	-
onco-lncRNA-180	ENST00000508512	chr5:66759636-66771305	-	GFI1	chr5:66771420-66771444	-
onco-lncRNA-180	ENST00000508512	chr5:66759636-66771305	-	FOXJ2	chr5:66771695-66771709	-
onco-lncRNA-180	ENST00000508512	chr5:66759636-66771305	-	OCT1	chr5:66771741-66771760	-
onco-lncRNA-182	ENST00000477643	chr3:108855687-108868973	+	HNF4	chr3:108855504-108855523	+
onco-lncRNA-195	NR_045196	chr5:9546311-9550409	+	PAX5	chr5:9546103-9546131	+
onco-lncRNA-195	NR_045196	chr5:9546311-9550409	+	PAX4	chr5:9546104-9546116	+
onco-lncRNA-195	NR_045196	chr5:9546311-9550409	+	SP1	chr5:9546221-9546231	+
onco-lncRNA-195	NR_045196	chr5:9546311-9550409	+	RREB1	chr5:9546277-9546291	+
onco-lncRNA-199	TCONS_00010961	chr5:72542336-72570644	-	MEF2	chr5:72570650-72570666	-
onco-lncRNA-199	TCONS_00010961	chr5:72542336-72570644	-	FREAC2	chr5:72570653-72570669	-
onco-lncRNA-199	TCONS_00010961	chr5:72542336-72570644	-	FREAC4	chr5:72570653-72570669	-
onco-lncRNA-199	TCONS_00010961	chr5:72542336-72570644	-	GATA1	chr5:72570656-72570670	-
onco-lncRNA-199	TCONS_00010961	chr5:72542336-72570644	-	LMO2COM	chr5:72571056-72571068	-
onco-lncRNA-202	TCONS_00024399	chr16:51788705-51837421	+	FOXJ2	chr16:51788279-51788297	+
onco-lncRNA-202	TCONS_00024399	chr16:51788705-51837421	+	FREAC2	chr16:51788280-51788296	+
onco-lncRNA-202	TCONS_00024399	chr16:51788705-51837421	+	FREAC4	chr16:51788280-51788296	+
onco-lncRNA-203	TCONS_00025378	chr17:37721023-37723729	+	RFX1	chr17:37720612-37720630	+
onco-lncRNA-203	TCONS_00025378	chr17:37721023-37723729	+	CEBP	chr17:37720706-37720724	+
onco-lncRNA-203	TCONS_00025378	chr17:37721023-37723729	+	ER	chr17:37720780-37720799	+
onco-lncRNA-203	TCONS_00025378	chr17:37721023-37723729	+	RFX1	chr17:37720874-37720891	+
onco-lncRNA-203	TCONS_00025378	chr17:37721023-37723729	+	EVI1	chr17:37720927-37720938	+
onco-lncRNA-203	TCONS_00025378	chr17:37721023-37723729	+	RSRFC4	chr17:37720965-37720981	+
onco-lncRNA-203	TCONS_00025378	chr17:37721023-37723729	+	MYOD	chr17:37721010-37721020	+
onco-lncRNA-207	TCONS_00027985	chr20:62258602-62260060	+	CREBP1	chr20:62258131-62258143	+
onco-lncRNA-207	TCONS_00027985	chr20:62258602-62260060	+	CREB	chr20:62258131-62258143	+
onco-lncRNA-207	TCONS_00027985	chr20:62258602-62260060	+	CREB	chr20:62258147-62258159	+
onco-lncRNA-207	TCONS_00027985	chr20:62258602-62260060	+	ATF	chr20:62258148-62258162	+
onco-lncRNA-207	TCONS_00027985	chr20:62258602-62260060	+	CREBP1	chr20:62258149-62258161	+
onco-lncRNA-207	TCONS_00027985	chr20:62258602-62260060	+	PAX3	chr20:62258210-62258223	+
onco-lncRNA-207	TCONS_00027985	chr20:62258602-62260060	+	AREB6	chr20:62258301-62258314	+
onco-lncRNA-207	TCONS_00027985	chr20:62258602-62260060	+	EGR1	chr20:62258362-62258374	+
onco-lncRNA-207	TCONS_00027985	chr20:62258602-62260060	+	EGR3	chr20:62258362-62258374	+
onco-lncRNA-207	TCONS_00027985	chr20:62258602-62260060	+	NGFIC	chr20:62258362-62258374	+
onco-lncRNA-207	TCONS_00027985	chr20:62258602-62260060	+	E2F	chr20:62258506-62258514	+
onco-lncRNA-210	ENST00000478824.1	chr17:46782564-46784708	+	FREAC3	chr17:46782175-46782191	+
onco-lncRNA-210	ENST00000478824.1	chr17:46782564-46784708	+	FREAC4	chr17:46782175-46782191	+
onco-lncRNA-210	ENST00000478824.1	chr17:46782564-46784708	+	RORA1	chr17:46782182-46782195	+
onco-lncRNA-210	ENST00000478824.1	chr17:46782564-46784708	+	GFI1	chr17:46782380-46782404	+
onco-lncRNA-210	ENST00000478824.1	chr17:46782564-46784708	+	TAL1ALPHAE47	chr17:46782418-46782434	+
onco-lncRNA-210	ENST00000478824.1	chr17:46782564-46784708	+	TAL1BETAE47	chr17:46782418-46782434	+
onco-lncRNA-210	ENST00000478824.1	chr17:46782564-46784708	+	TAL1BETAITF2	chr17:46782418-46782434	+
onco-lncRNA-214	NR_103775	chr2:161114229-161128406	-	FOXD3	chr2:161128713-161128725	-
onco-lncRNA-214	NR_103775	chr2:161114229-161128406	-	FOXO4	chr2:161128779-161128793	-
onco-lncRNA-214	NR_103775	chr2:161114229-161128406	-	MEF2	chr2:161128791-161128807	-
onco-lncRNA-215	NR_024418	chr5:135527155-135528851	-	BACH2	chr5:135528984-135528995	-
onco-lncRNA-216	ENST00000530759	chr11:76152381-76155618	-	PAX3	chr11:76155716-76155729	-
onco-lncRNA-216	ENST00000530759	chr11:76152381-76155618	-	NFY	chr11:76155750-76155761	-
onco-lncRNA-216	ENST00000530759	chr11:76152381-76155618	-	E2F	chr11:76156005-76156013	-
onco-lncRNA-216	ENST00000530759	chr11:76152381-76155618	-	PAX5	chr11:76156029-76156057	-
onco-lncRNA-216	ENST00000530759	chr11:76152381-76155618	-	FOXO1	chr11:76156093-76156107	-
onco-lncRNA-216	ENST00000530759	chr11:76152381-76155618	-	FOXO4	chr11:76156093-76156107	-
onco-lncRNA-221	TCONS_00014977	chr8:37455061-37456790	-	CHX10	chr8:37457270-37457284	-
onco-lncRNA-222	TCONS_00020094	chr11:69290398-69291552	-	SOX9	chr11:69291561-69291575	-
onco-lncRNA-222	TCONS_00020094	chr11:69290398-69291552	-	SRY	chr11:69291562-69291574	-
onco-lncRNA-222	TCONS_00020094	chr11:69290398-69291552	-	SOX5	chr11:69291563-69291573	-
onco-lncRNA-222	TCONS_00020094	chr11:69290398-69291552	-	FREAC4	chr11:69291563-69291579	-
onco-lncRNA-222	TCONS_00020094	chr11:69290398-69291552	-	HOXA3	chr11:69291575-69291584	-
onco-lncRNA-222	TCONS_00020094	chr11:69290398-69291552	-	IK1	chr11:69291689-69291702	-
onco-lncRNA-222	TCONS_00020094	chr11:69290398-69291552	-	IK3	chr11:69291689-69291702	-
onco-lncRNA-222	TCONS_00020094	chr11:69290398-69291552	-	IK2	chr11:69291690-69291702	-
onco-lncRNA-225	ENST00000606706	chr13:54699129-54706954	-	MEIS1	chr13:54707307-54707319	-
onco-lncRNA-228	NR_034011	chr4:119199916-119200978	+	TATA	chr4:119199880-119199890	+

[truncated: 5 more sheets: SuppTable11, SuppTable12, SuppTable13, SuppTable14, SuppTable15]
